# Supplementary material for: Diversity of Cell Wall Related Proteins in Human Pathogenic Fungi
Source: MDPI journal article supplement (doi:10.3390/jof4010006), 2017-12-29

Tree scale: 1

### Colored ranges

- 1,3,4 glucanase
- 1,6 glucan synthase
- beta\_glucanase
- Chitin transglycosylase

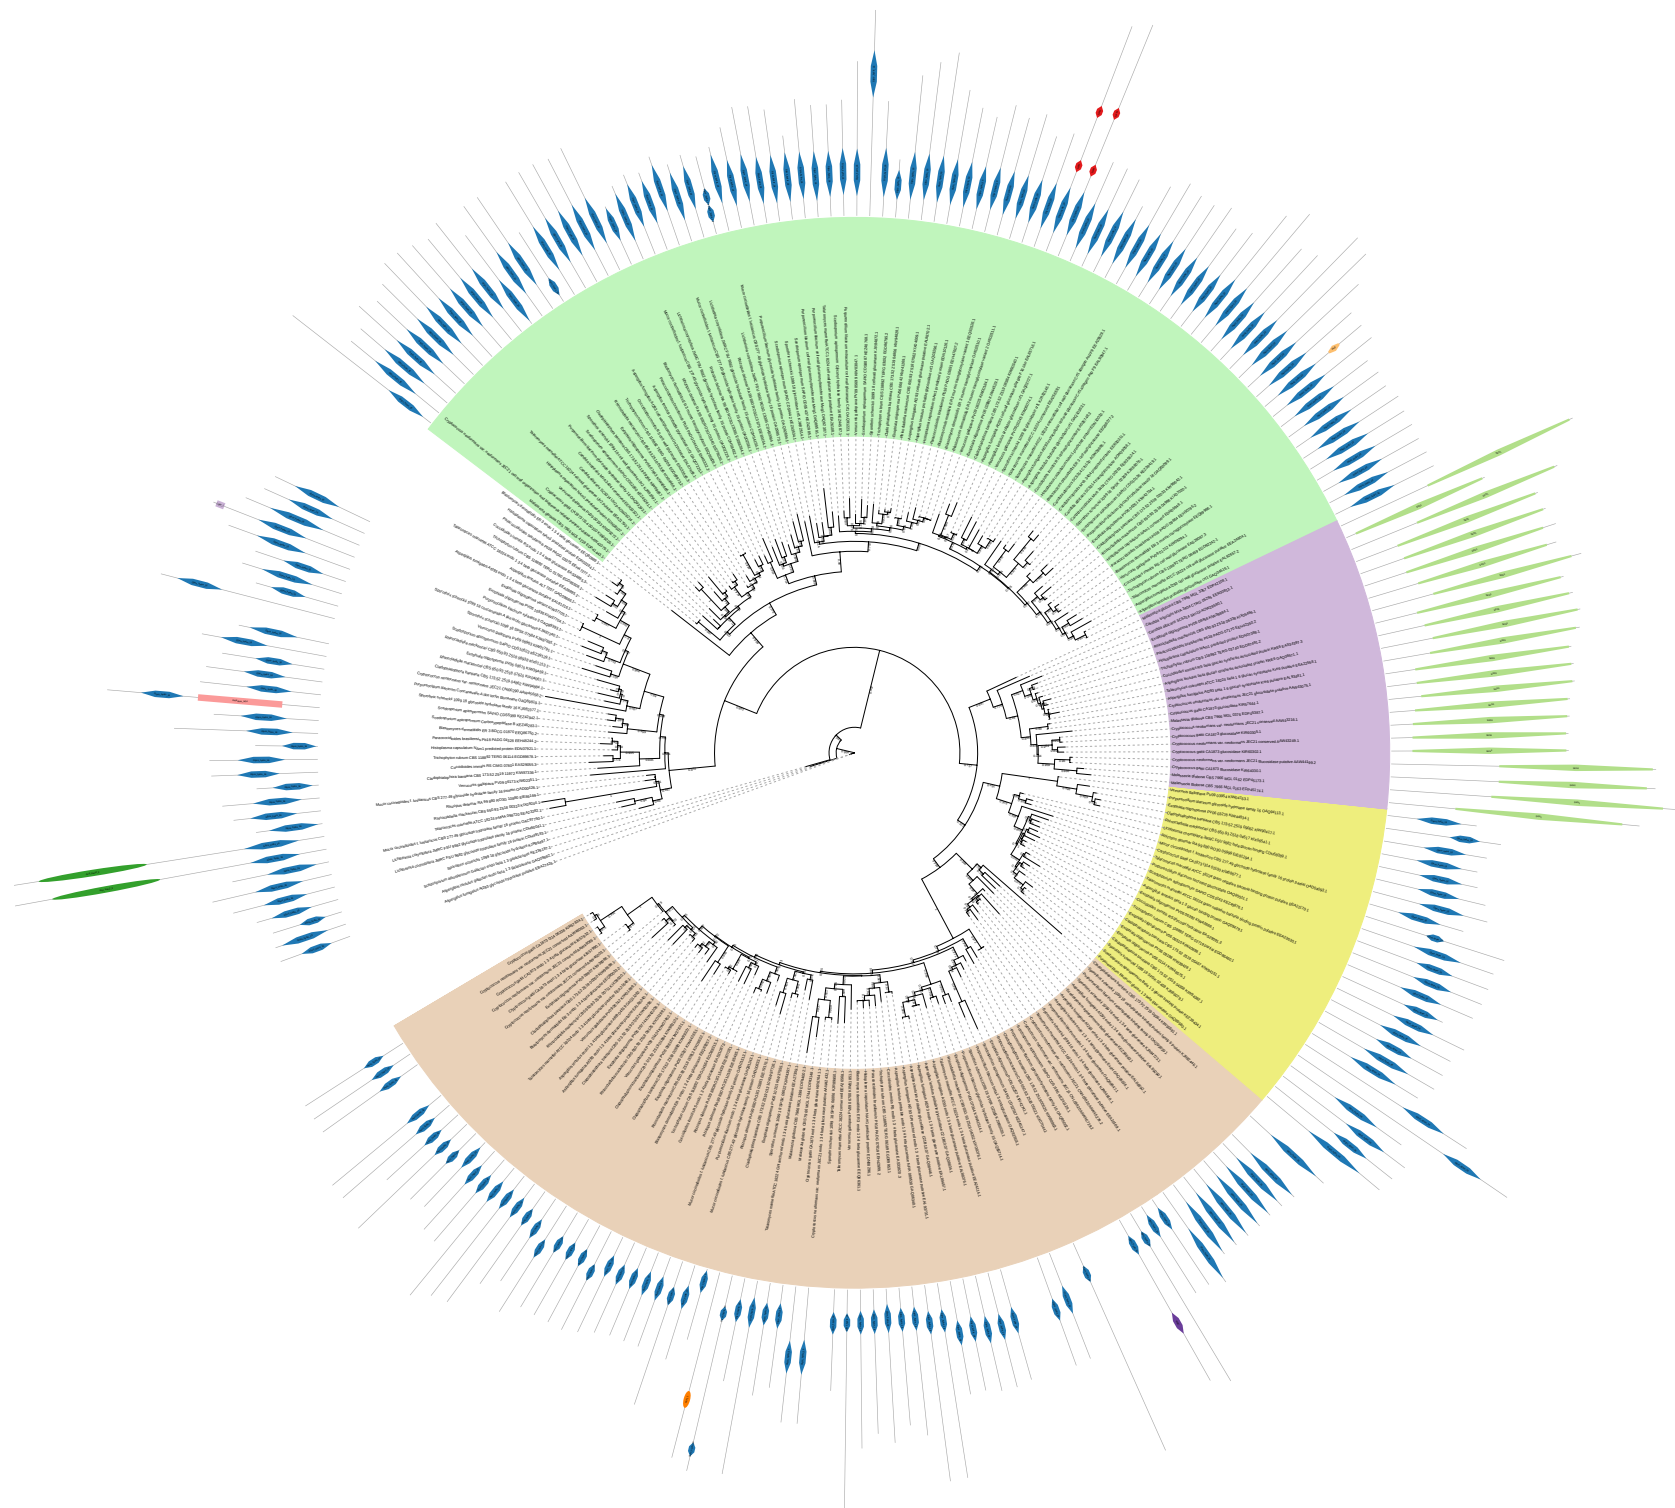

Supplement: s1 [file s1]
