# Supplementary figures and images for: Diversity of Cell Wall Related Proteins in Human Pathogenic Fungi
Source: MDPI journal article supplement (doi:10.3390/jof4010006), 2017-12-29

Tree scale: 1

Colored ranges

alg14

UDPglucosyl transferase

ALG13

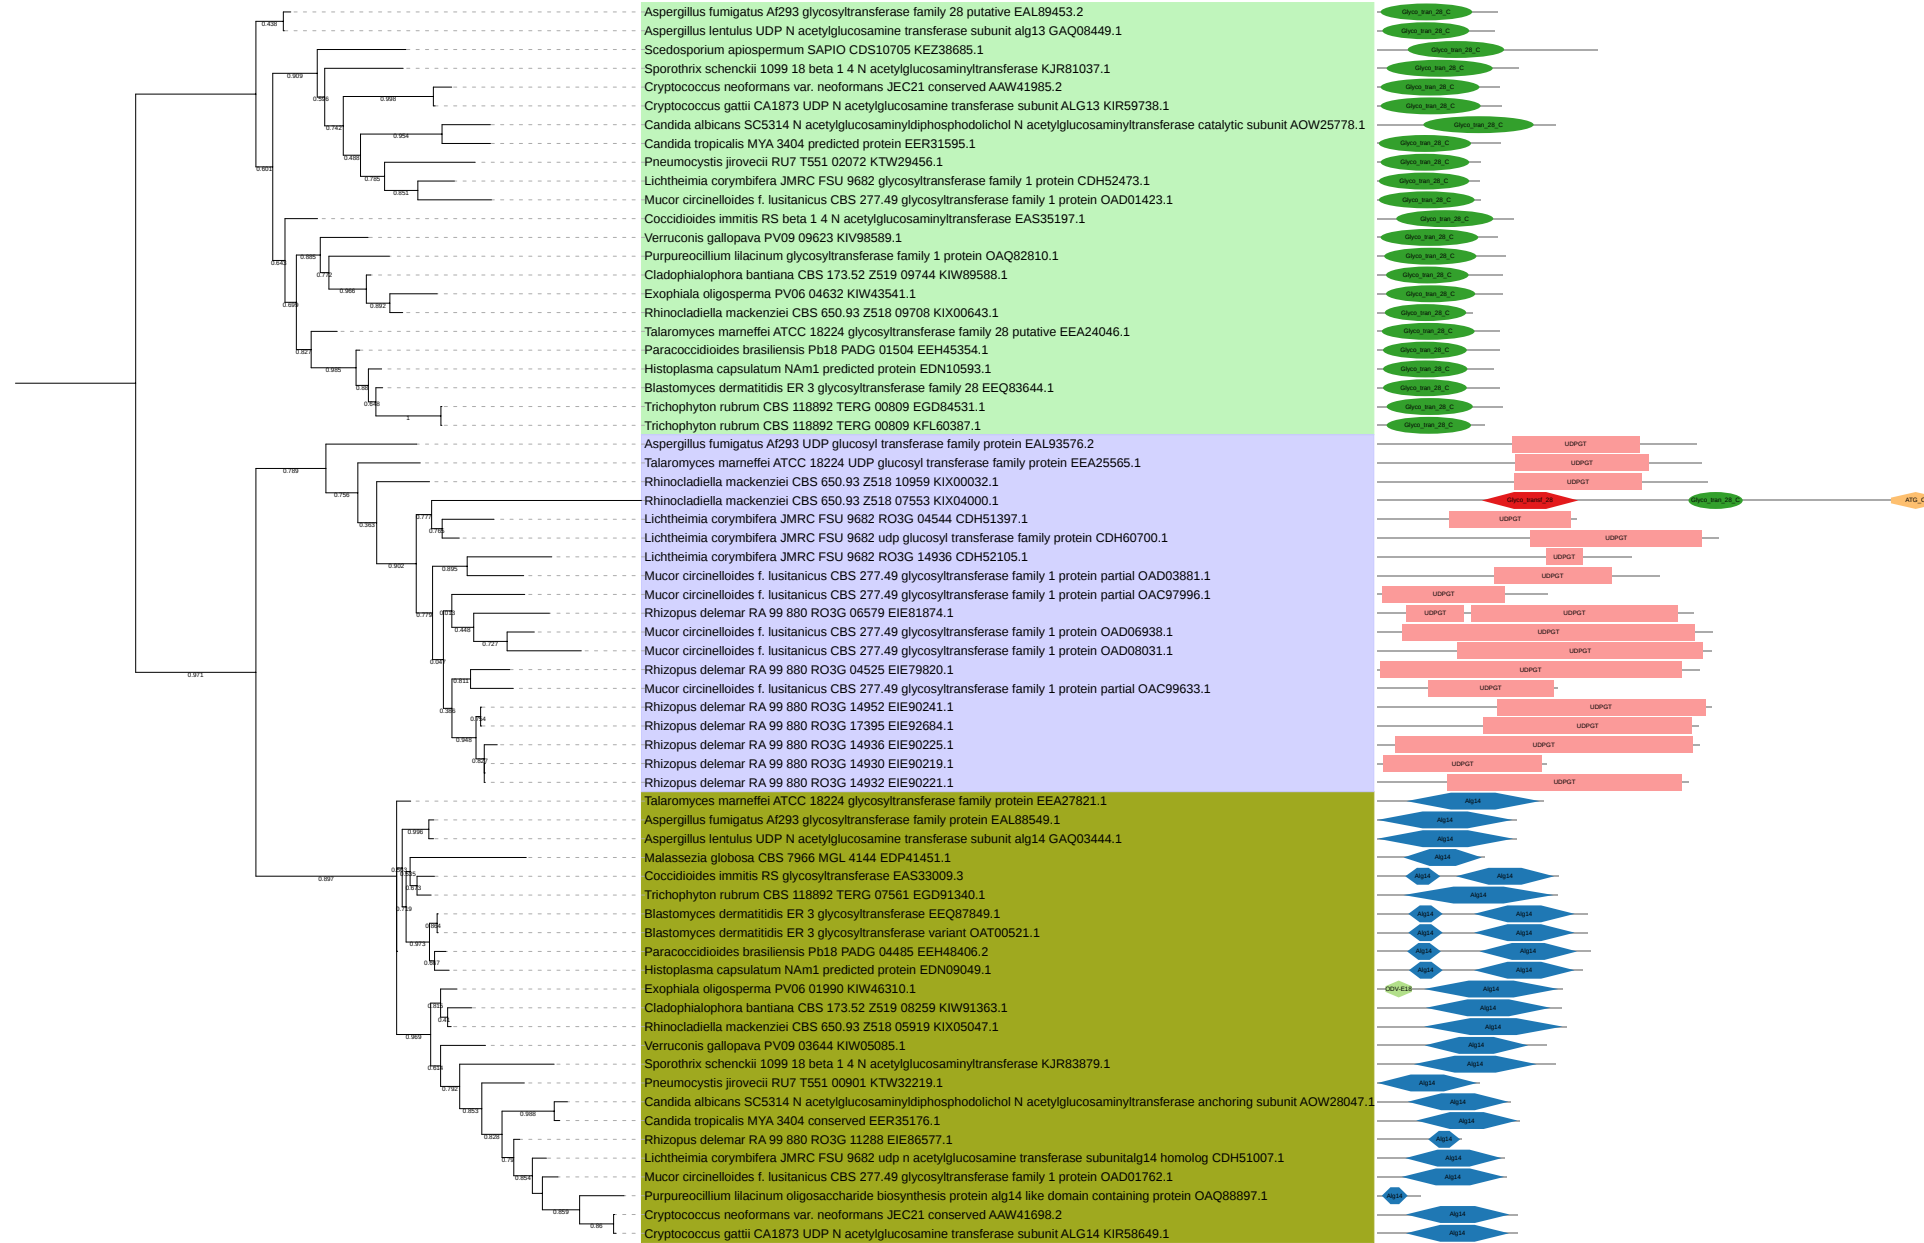

Supplement: s1 [file s1]

Tree scale: 0.1

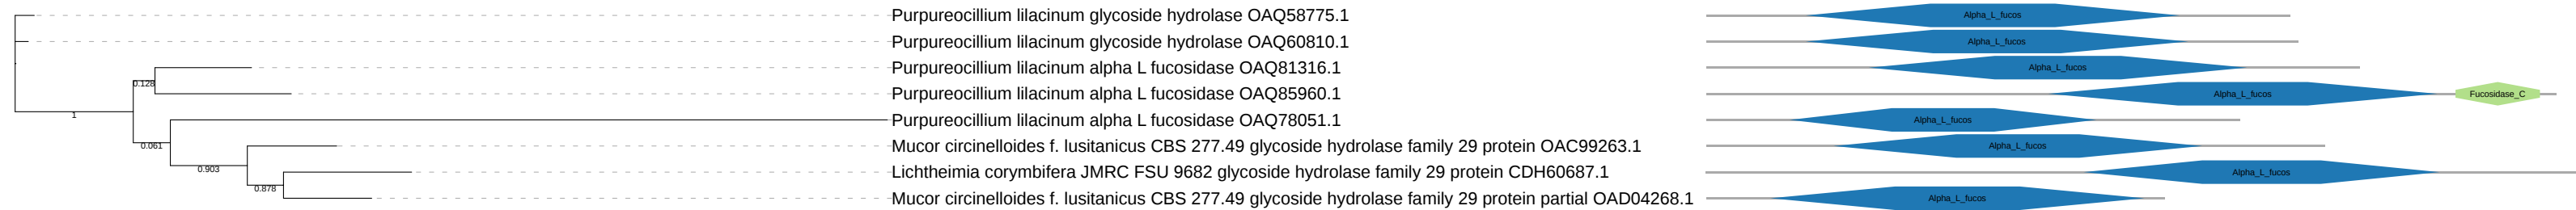

Supplement: s1 [file s1]

Tree scale: 0.1

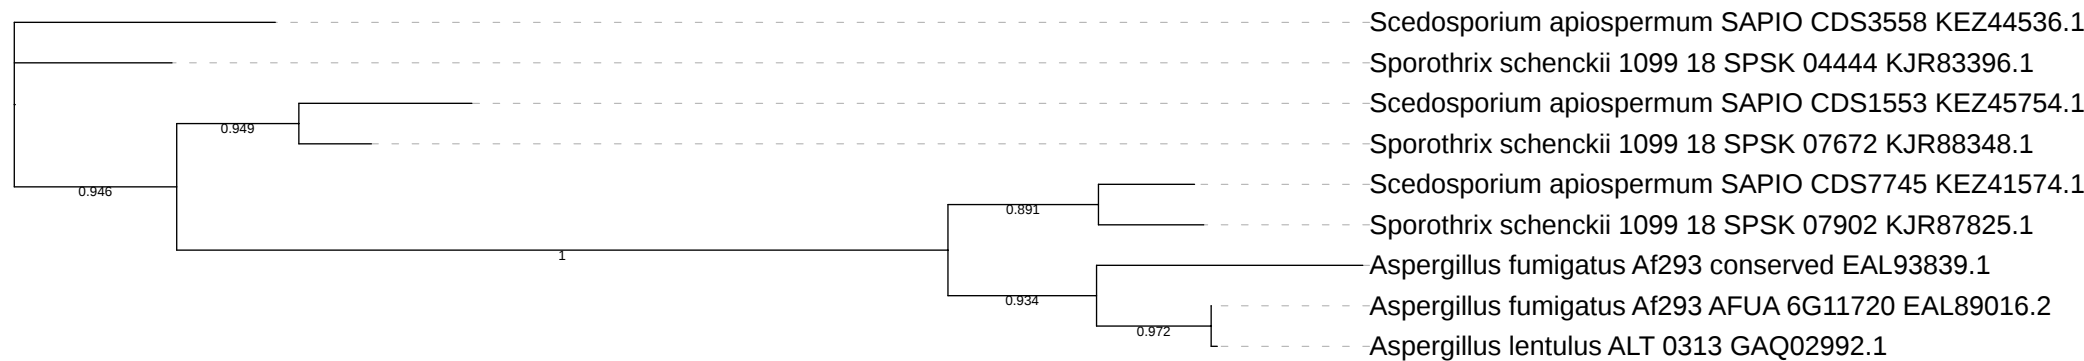

Supplement: s1 [file s1]

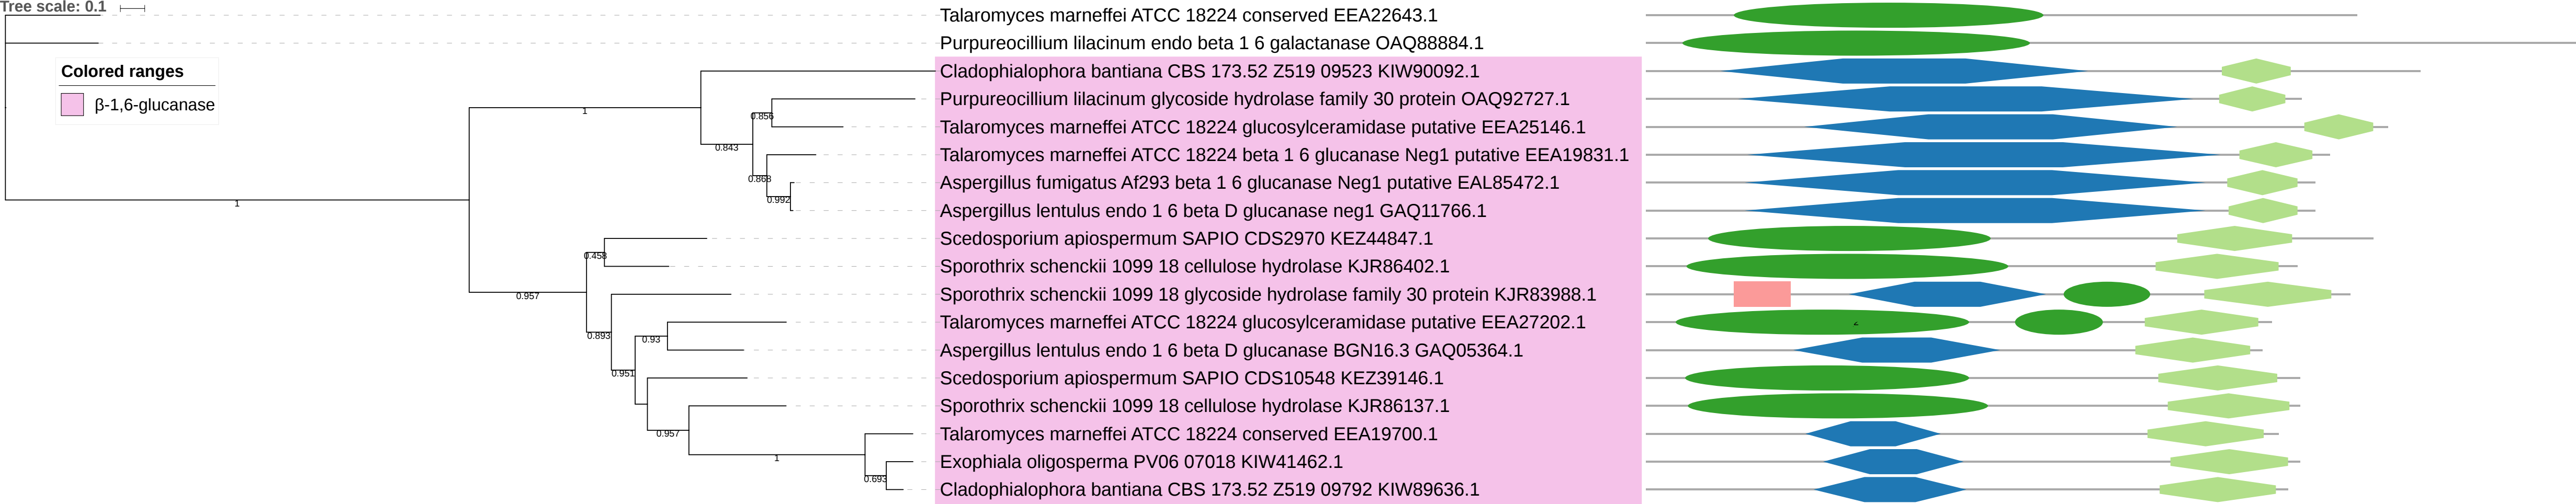

Supplement: s1 [file s1]

Tree scale: 0.1

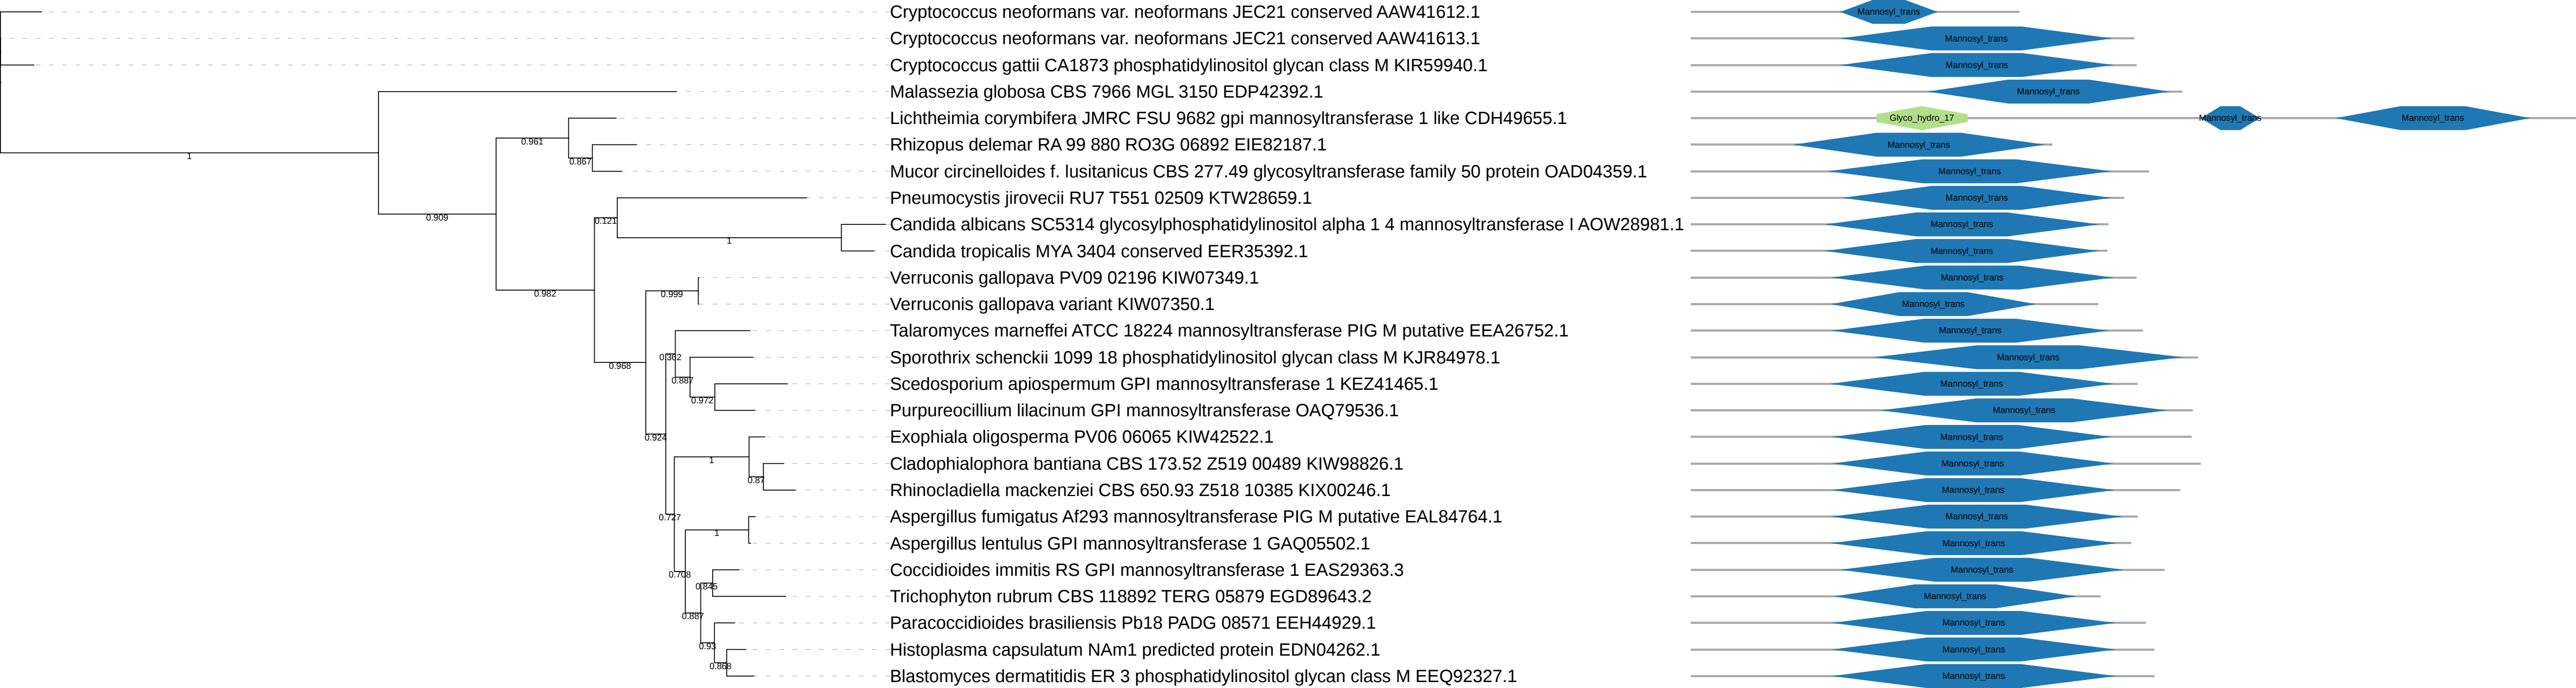

Supplement: s1 [file s1]

Tree scale: 0.1

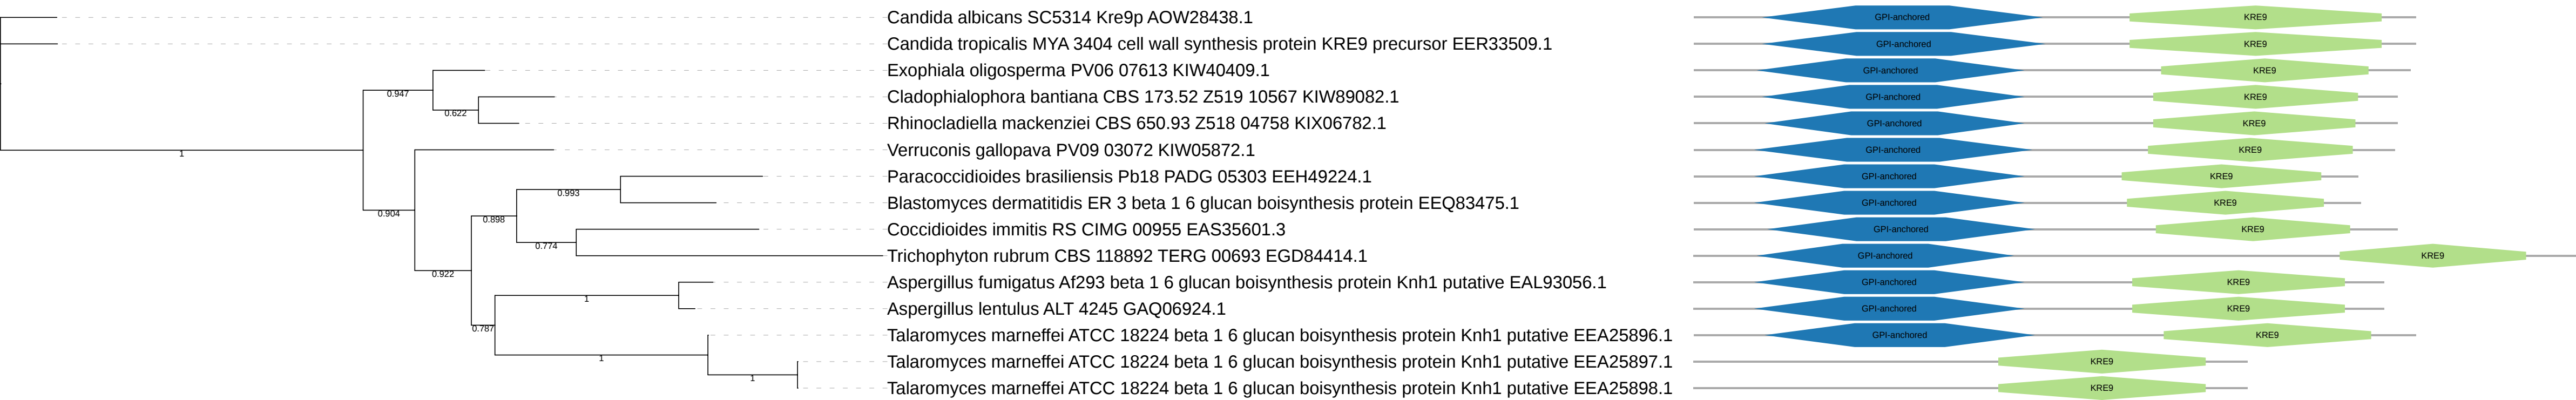

Supplement: s1 [file s1]

Tree scale: 0.1

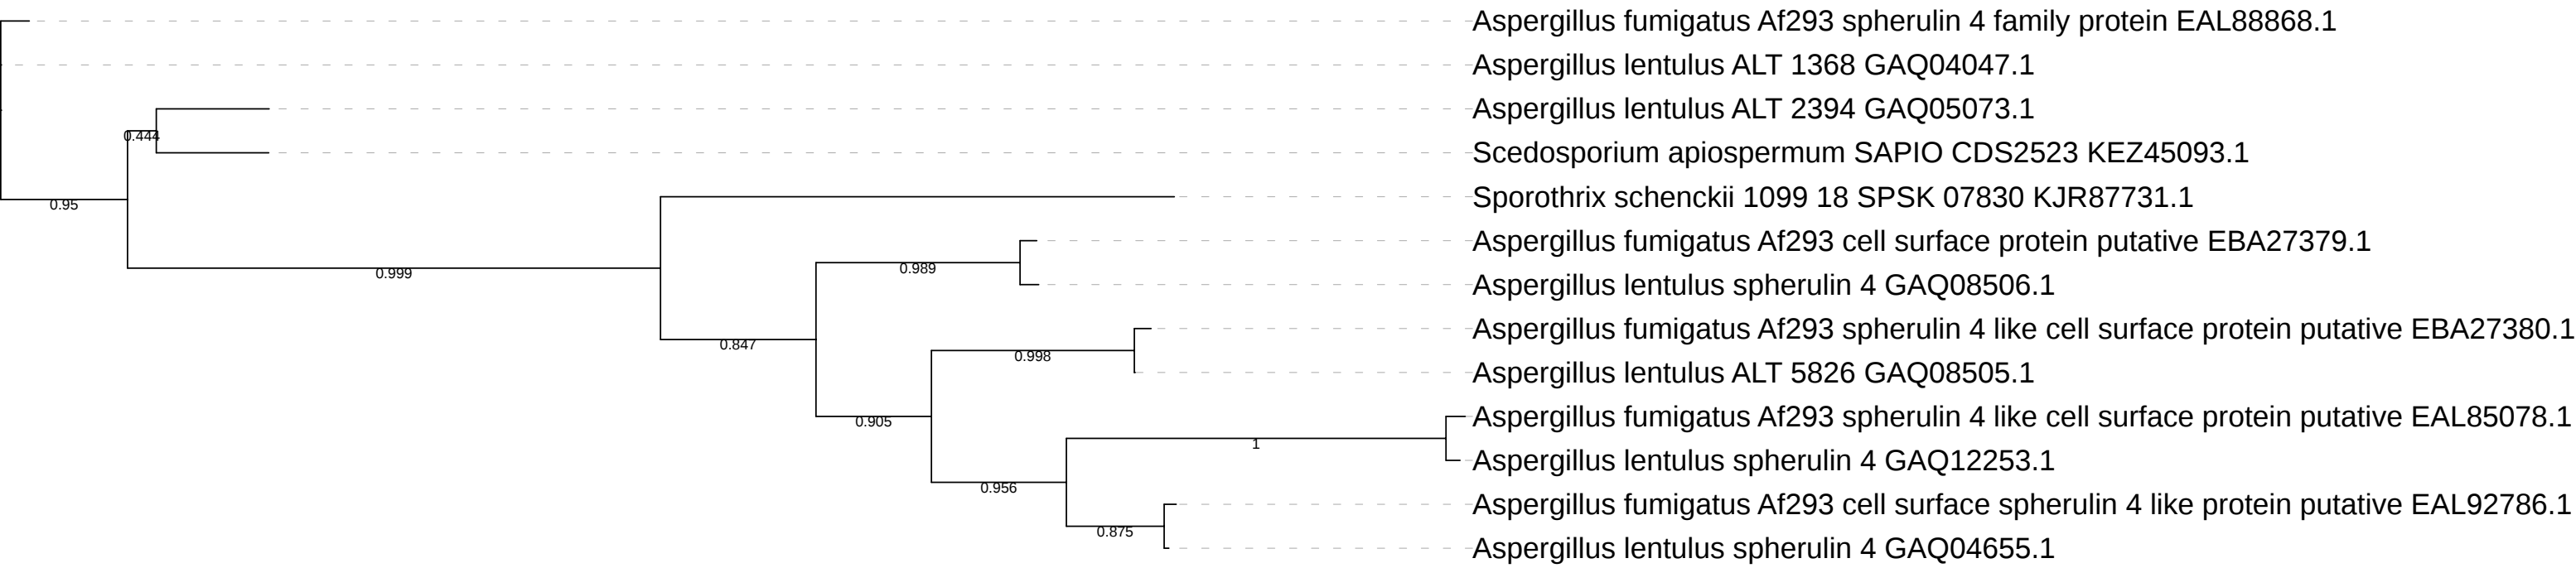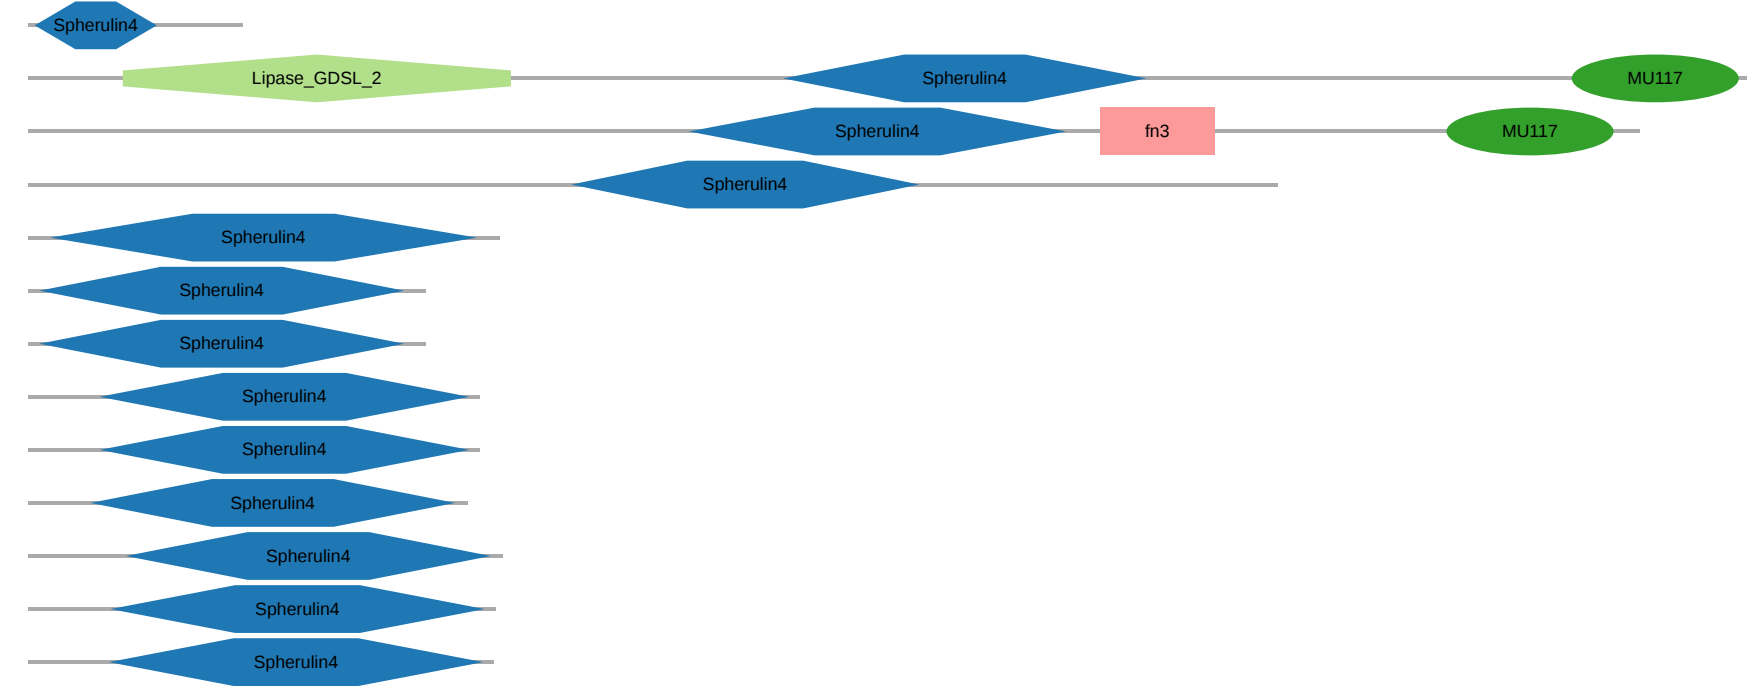

Supplement: s1 [file s1]

Tree scale: 1 

## Colored ranges

 Nacetylglucosaminyltransferase

 Mannosyltransferase

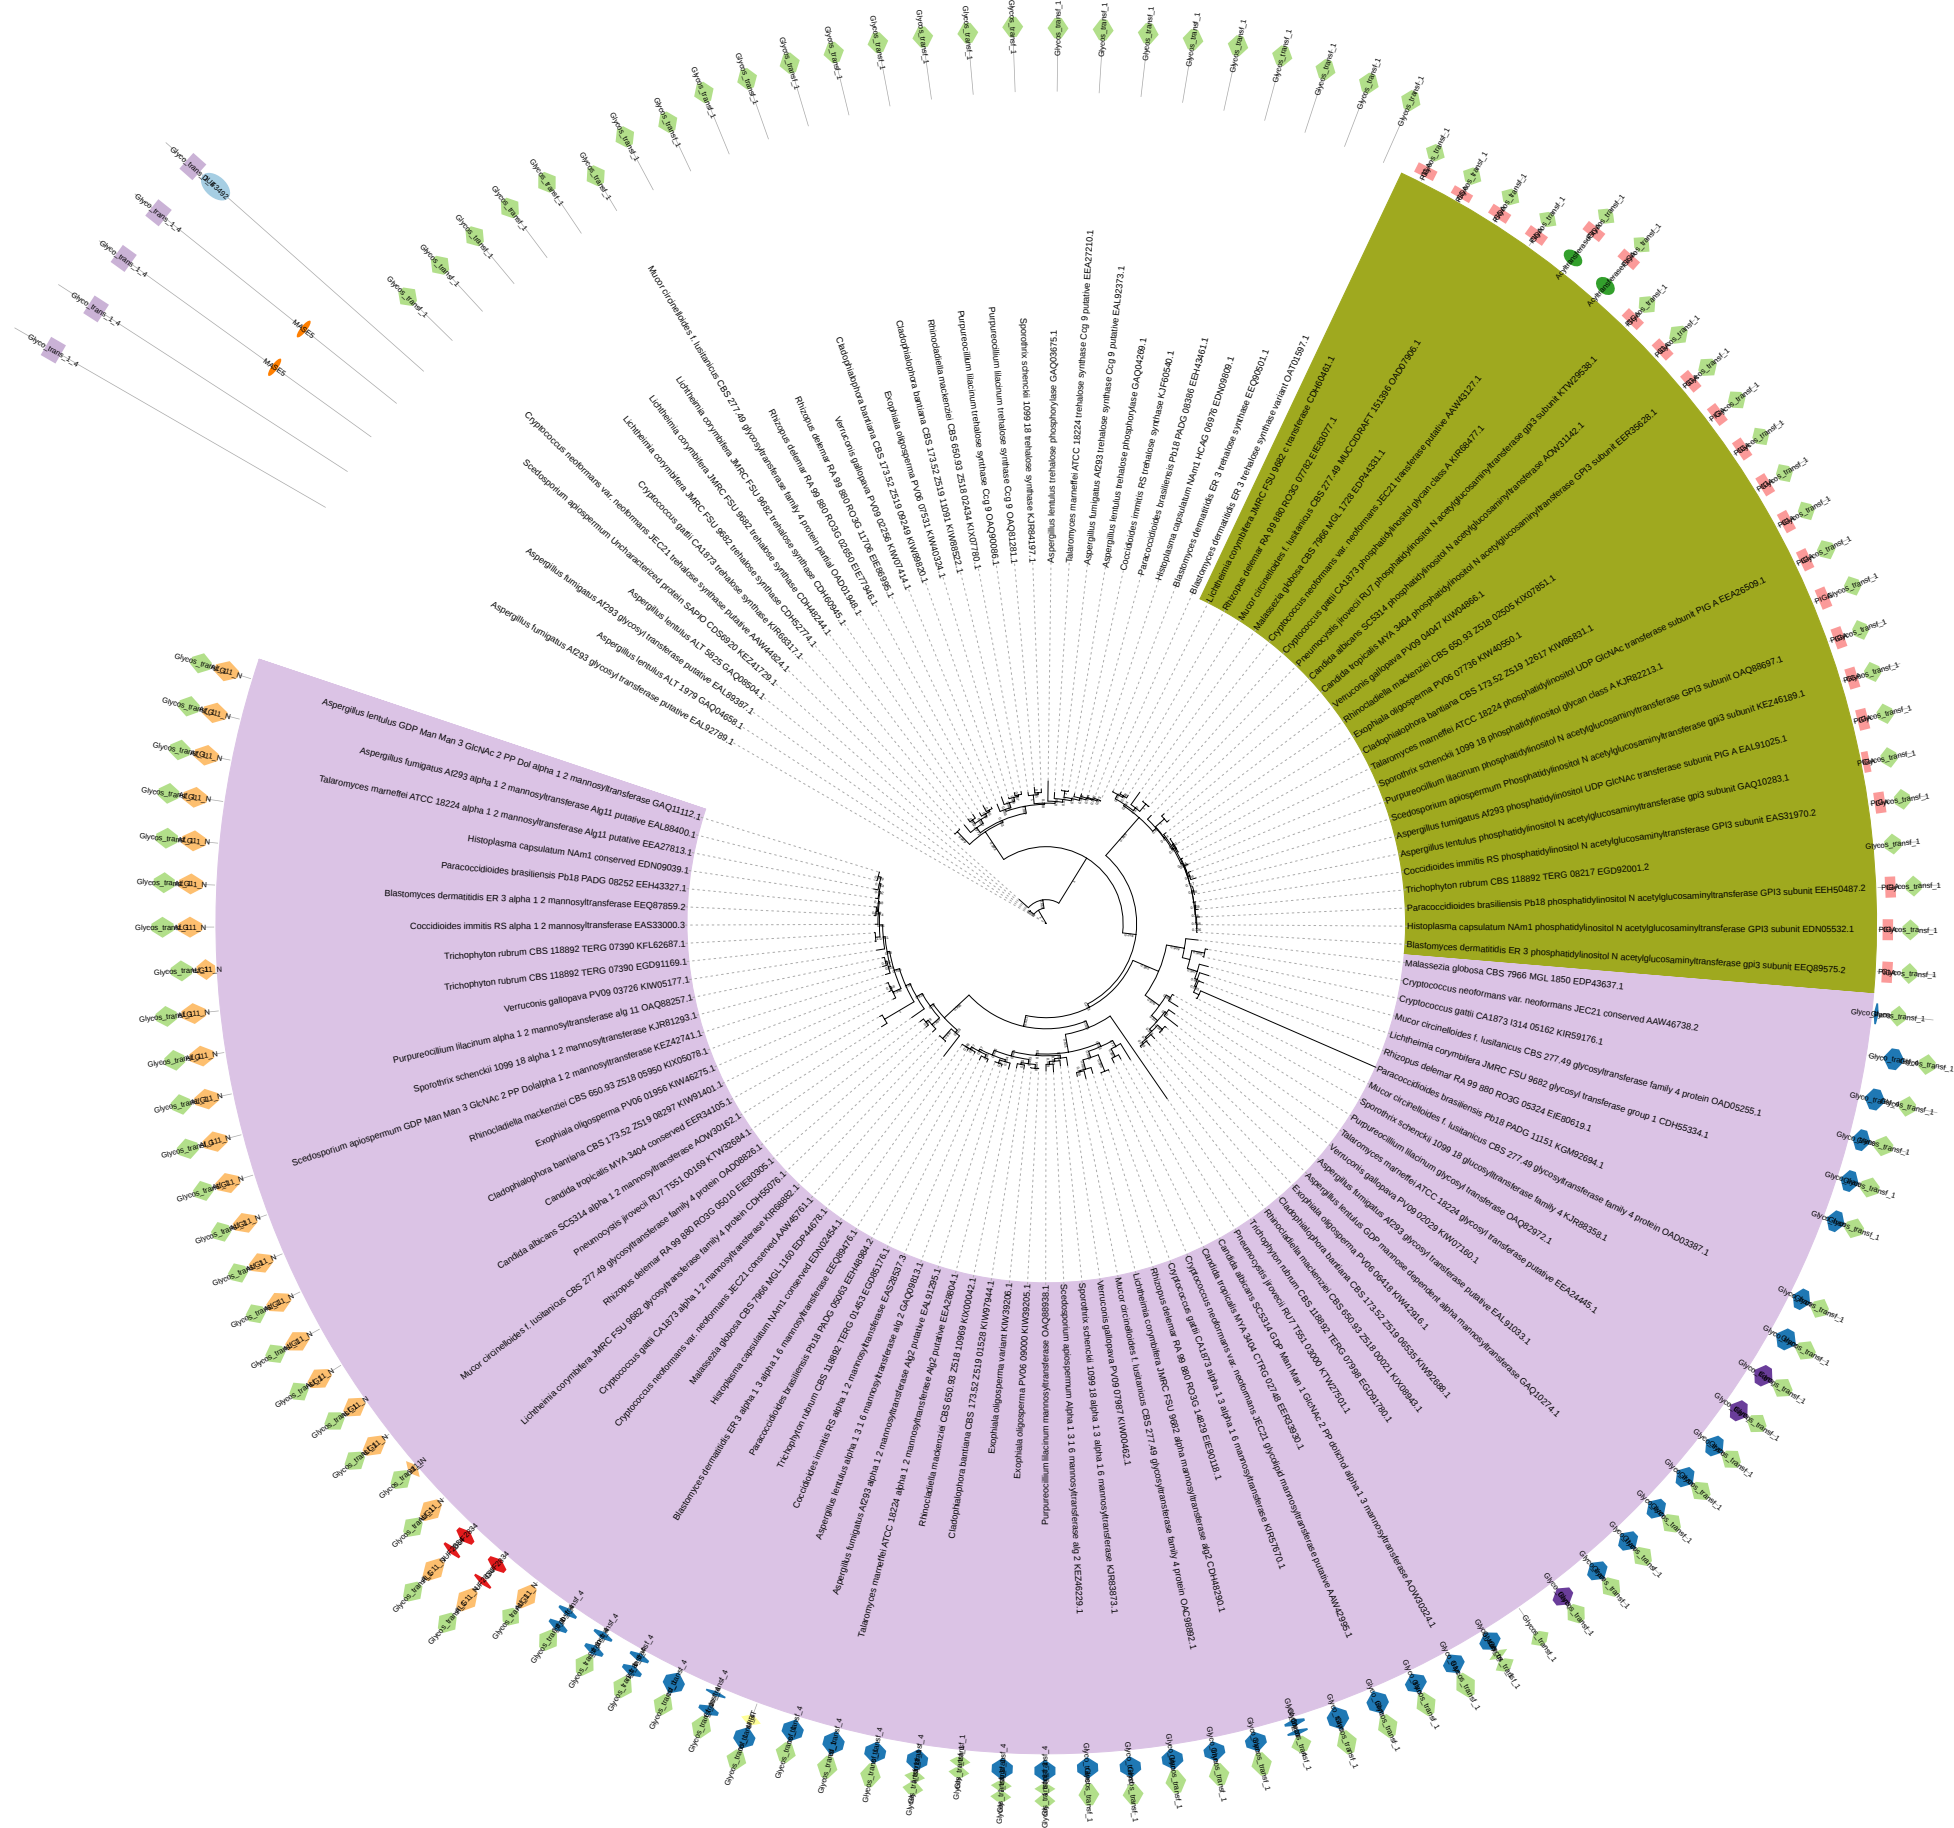

Supplement: s1 [file s1]

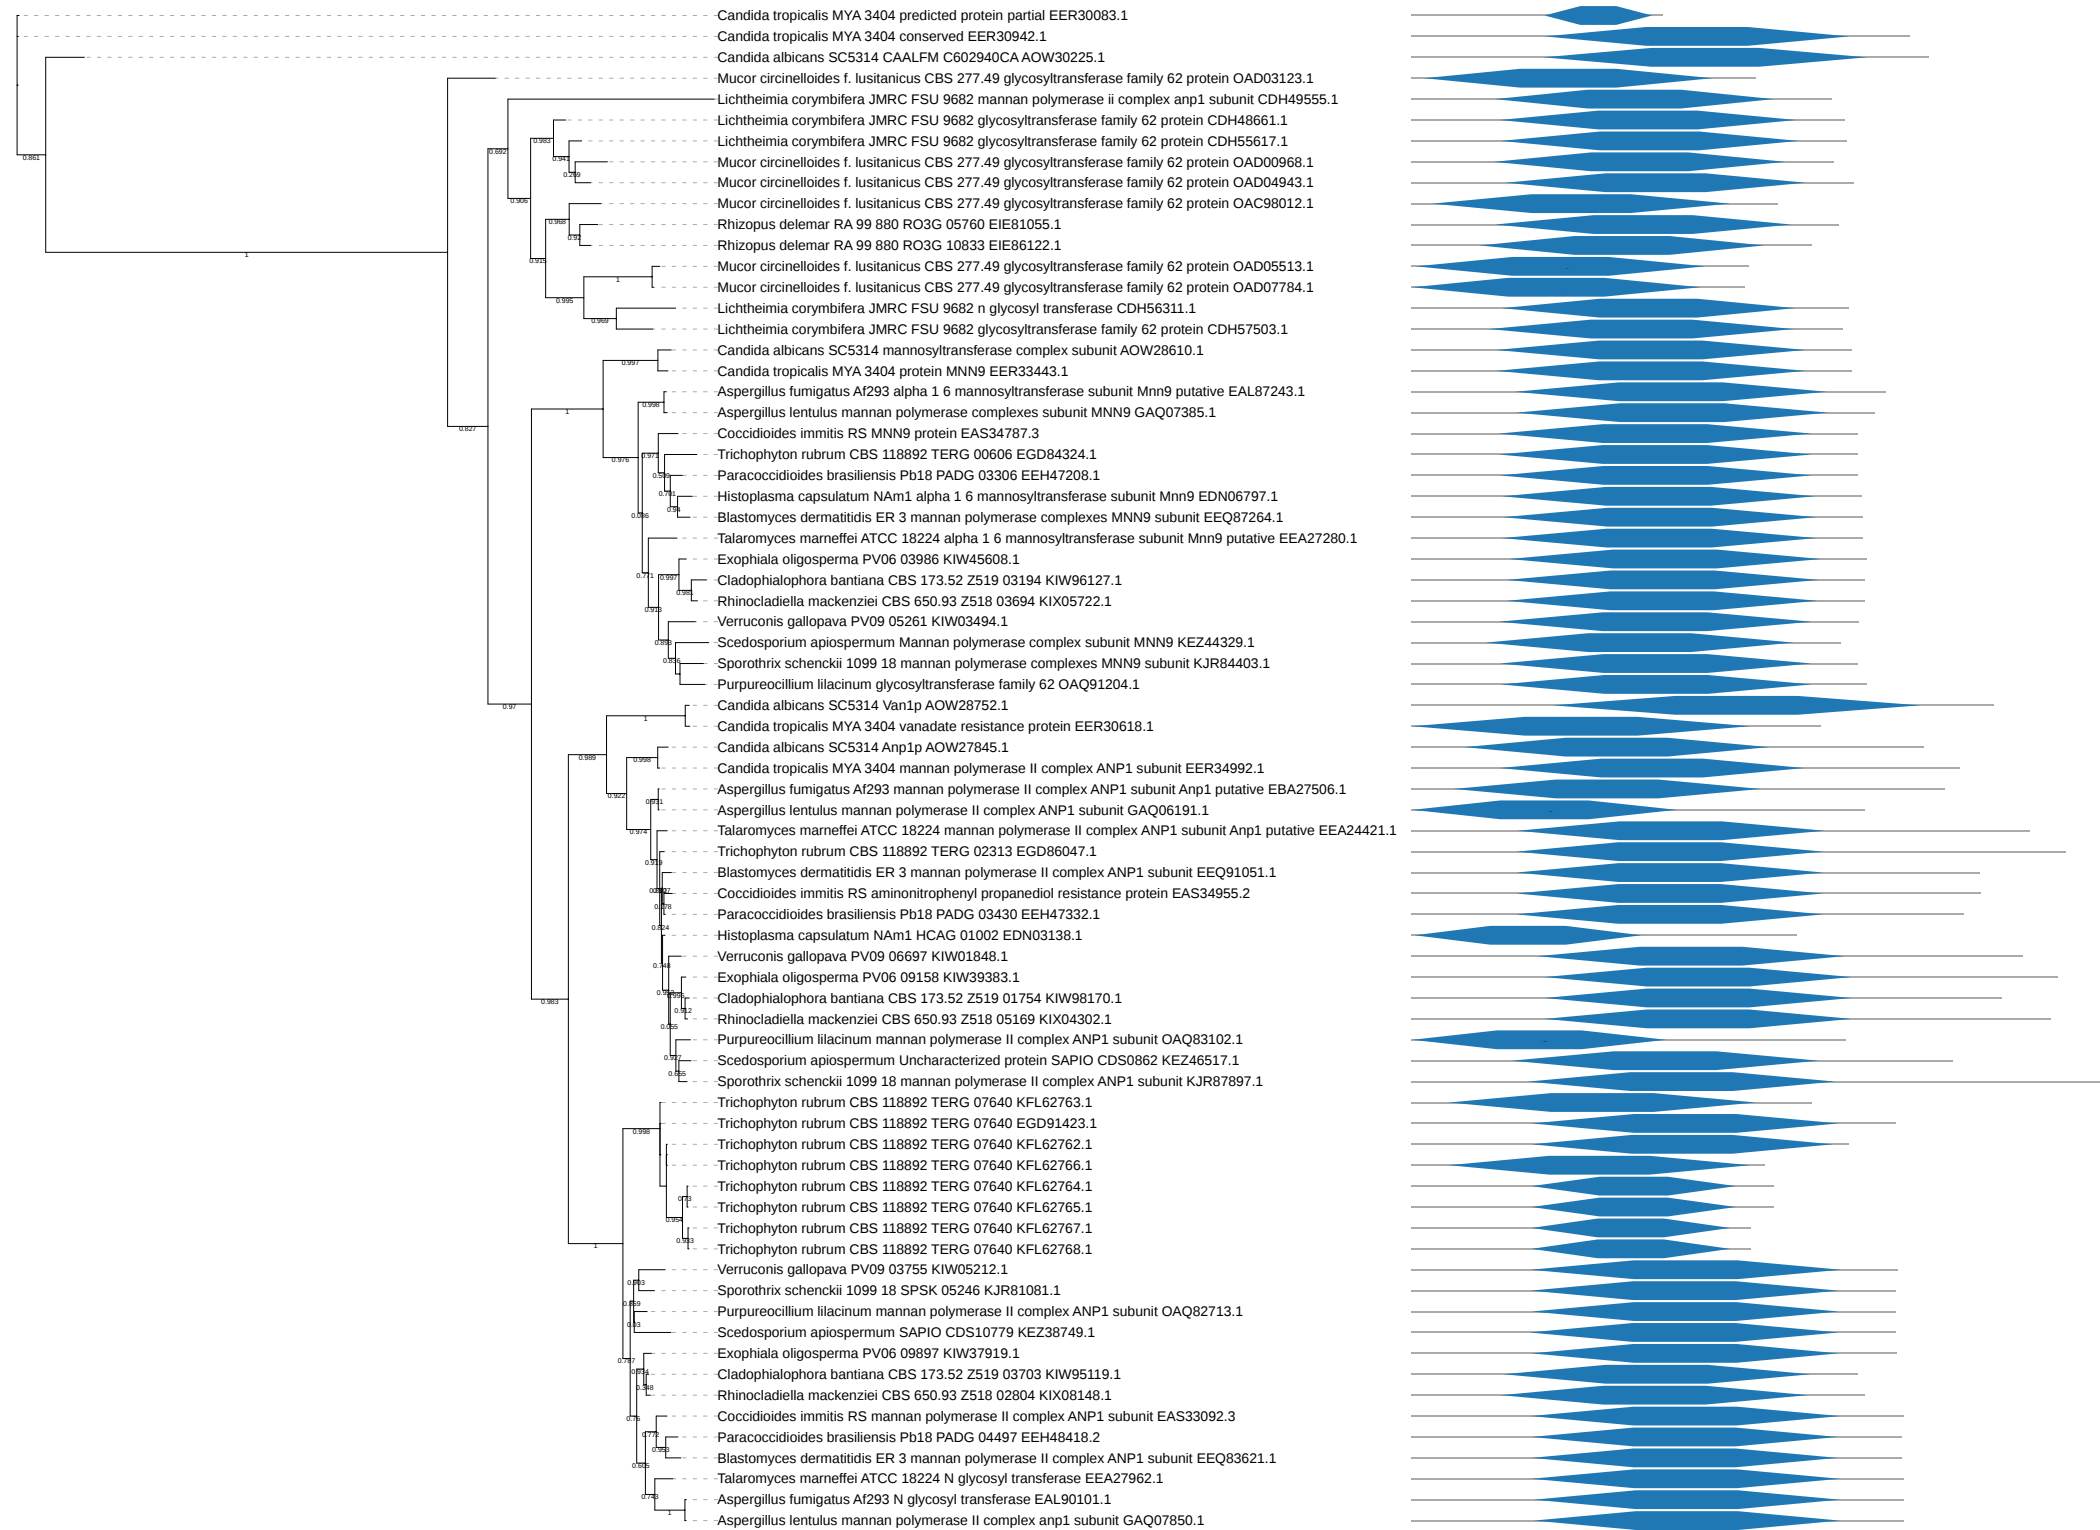

Supplement: s1 [file s1]

---

## Colored ranges

1

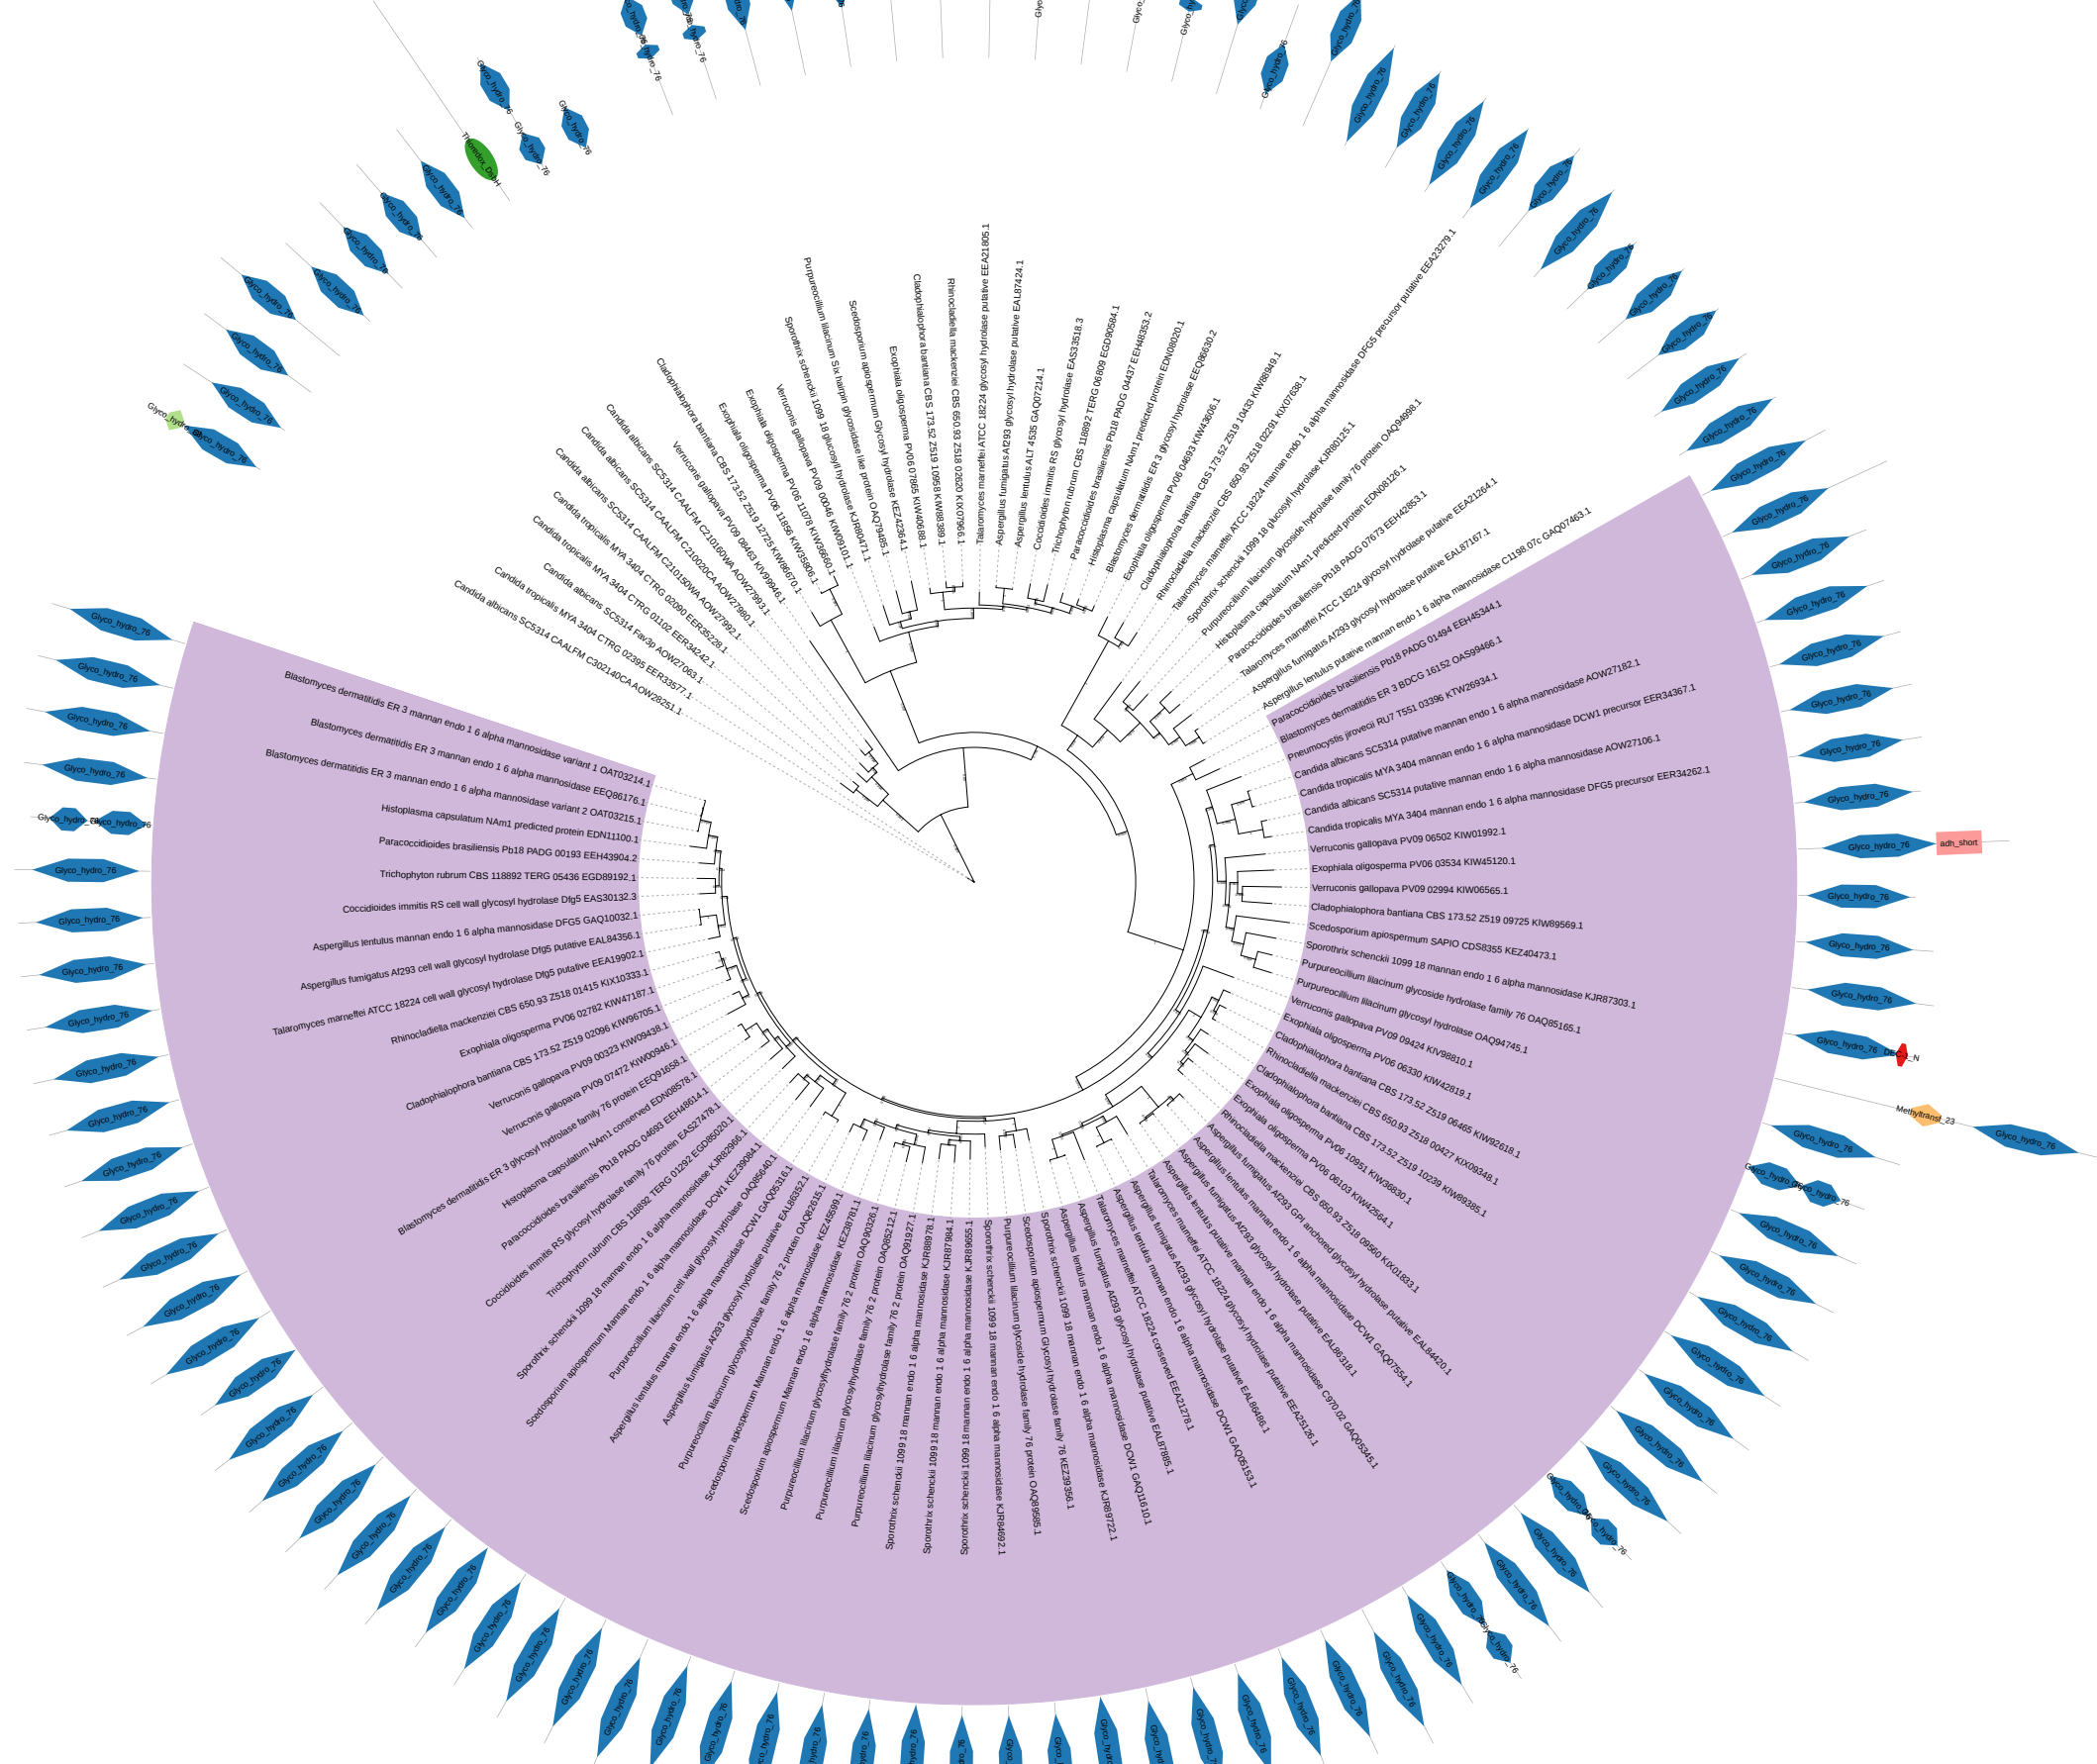

Supplement: s1 [file s1]

Tree scale: 1

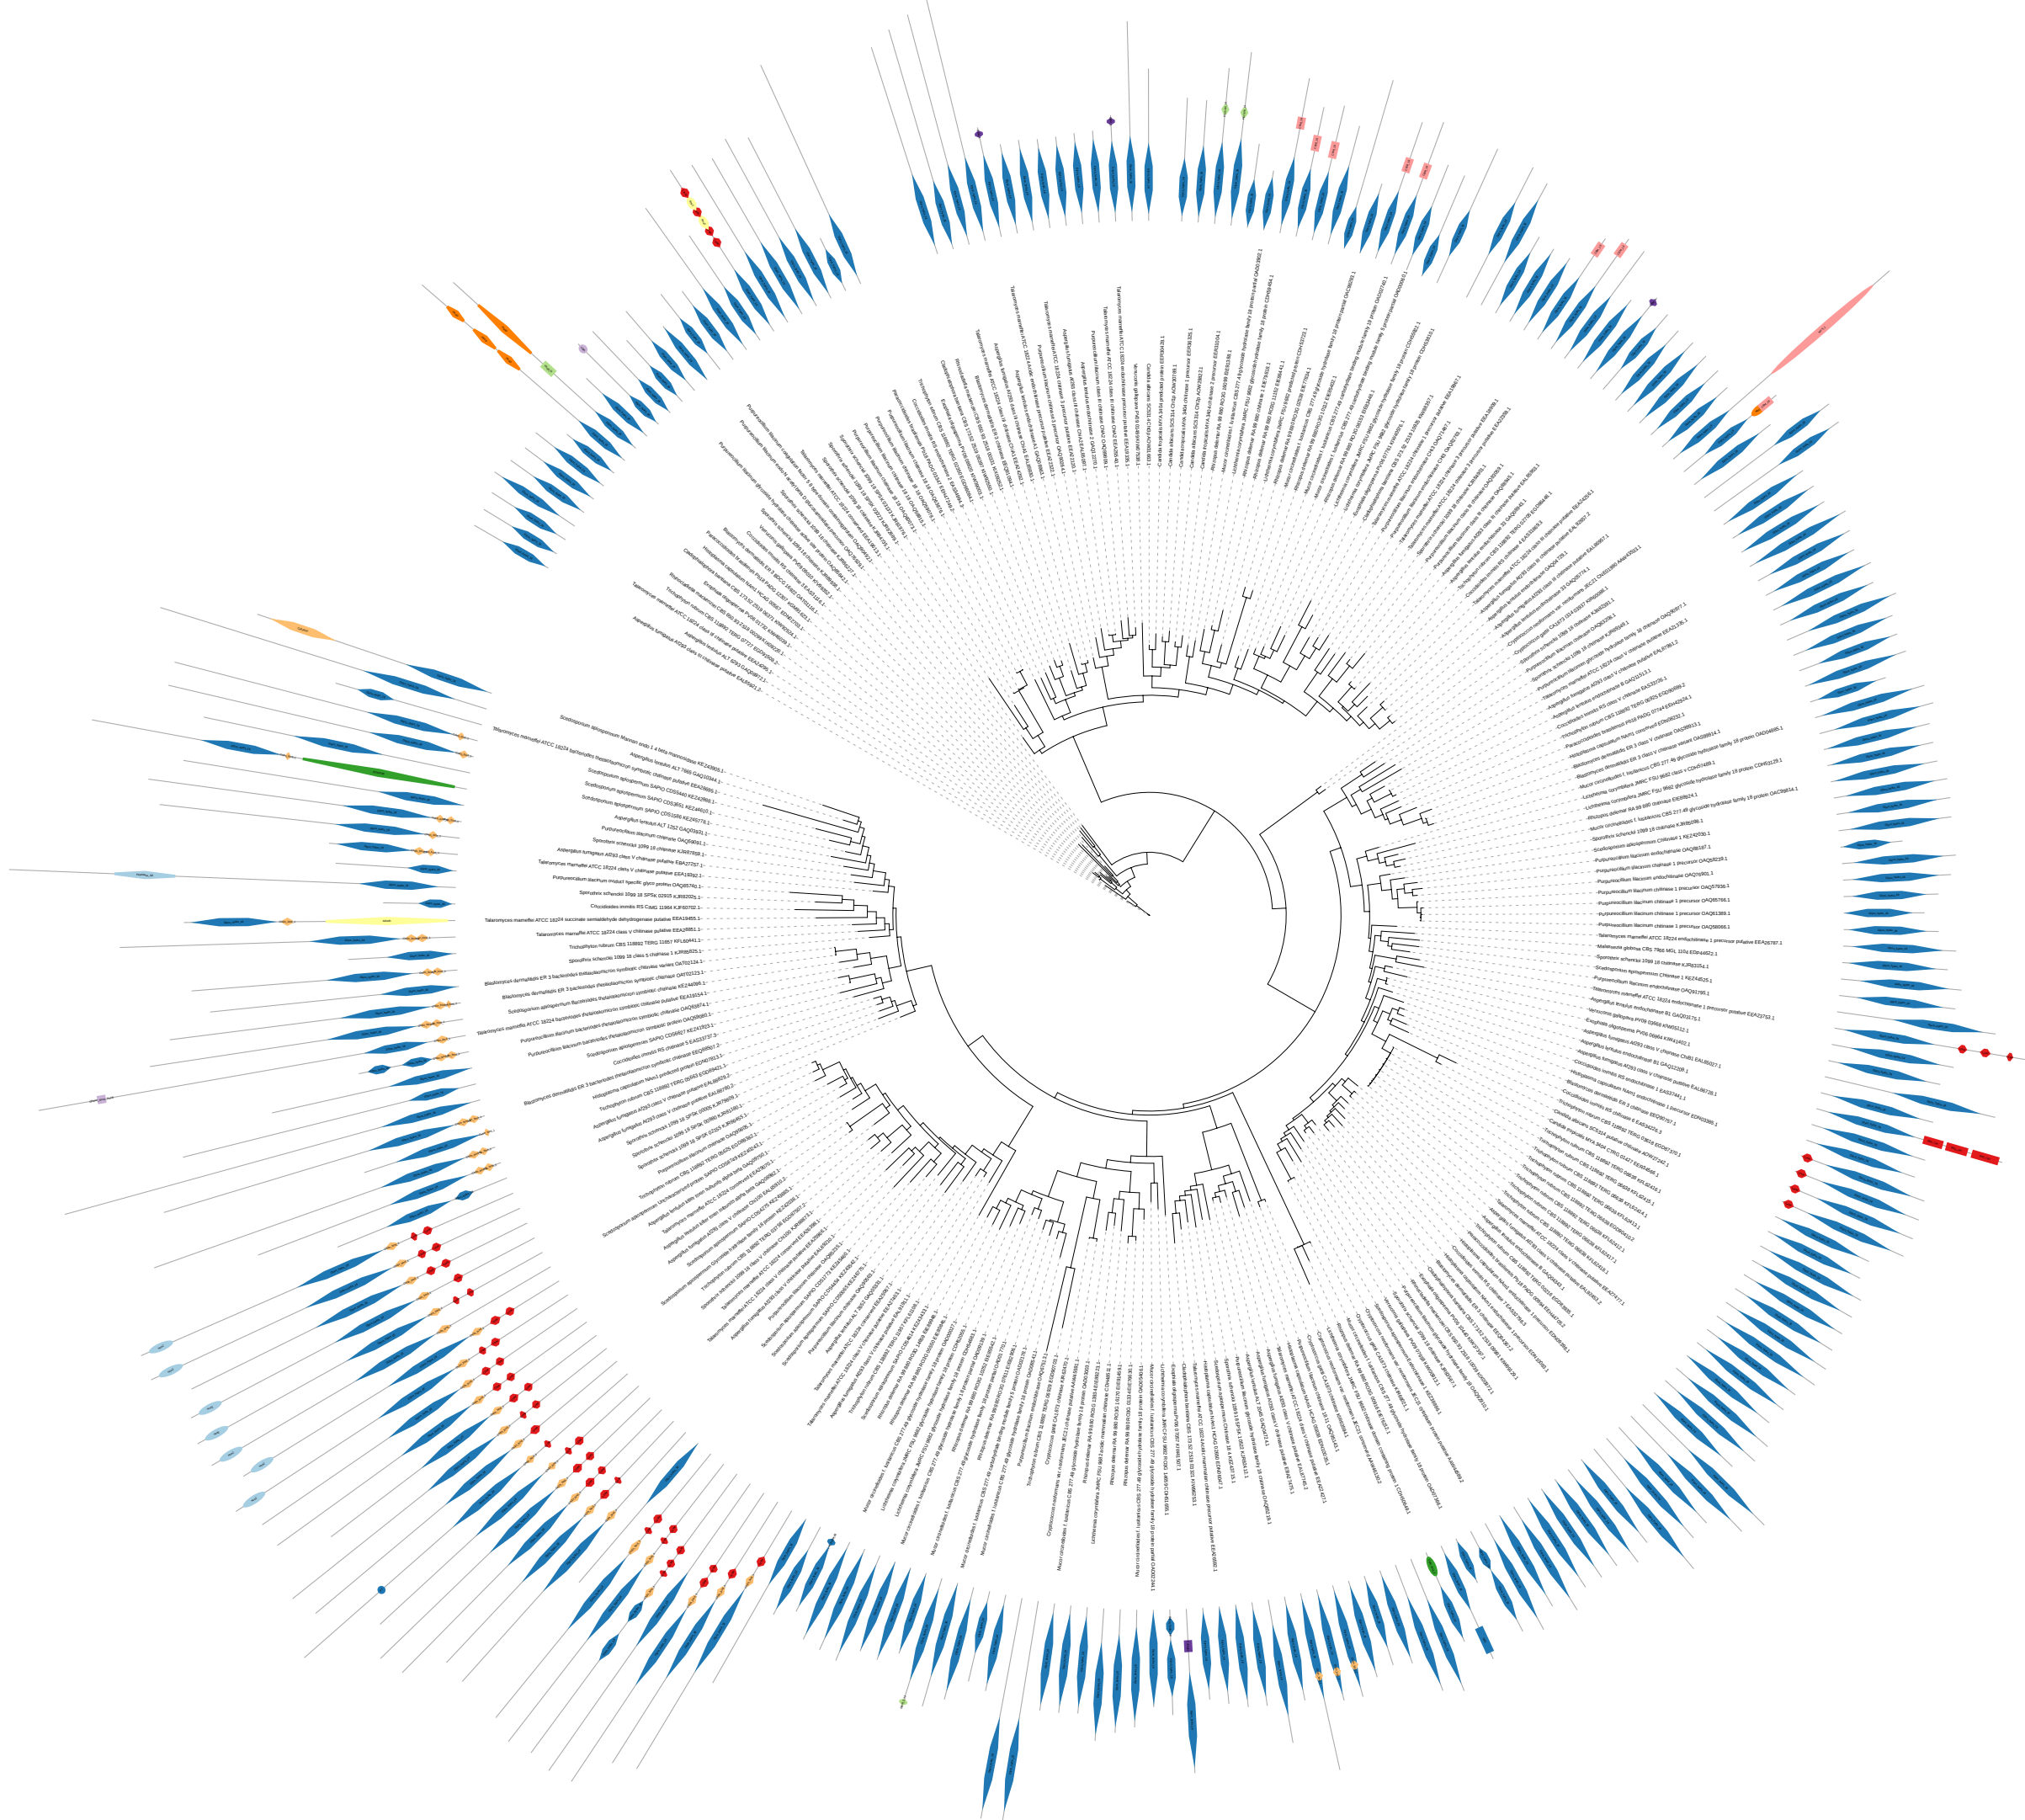

Supplement: s1 [file s1]

Tree scale: 1

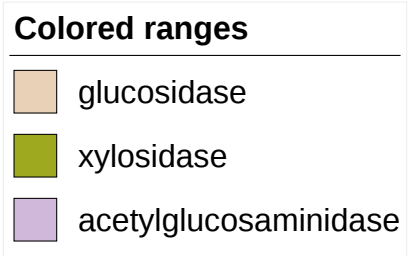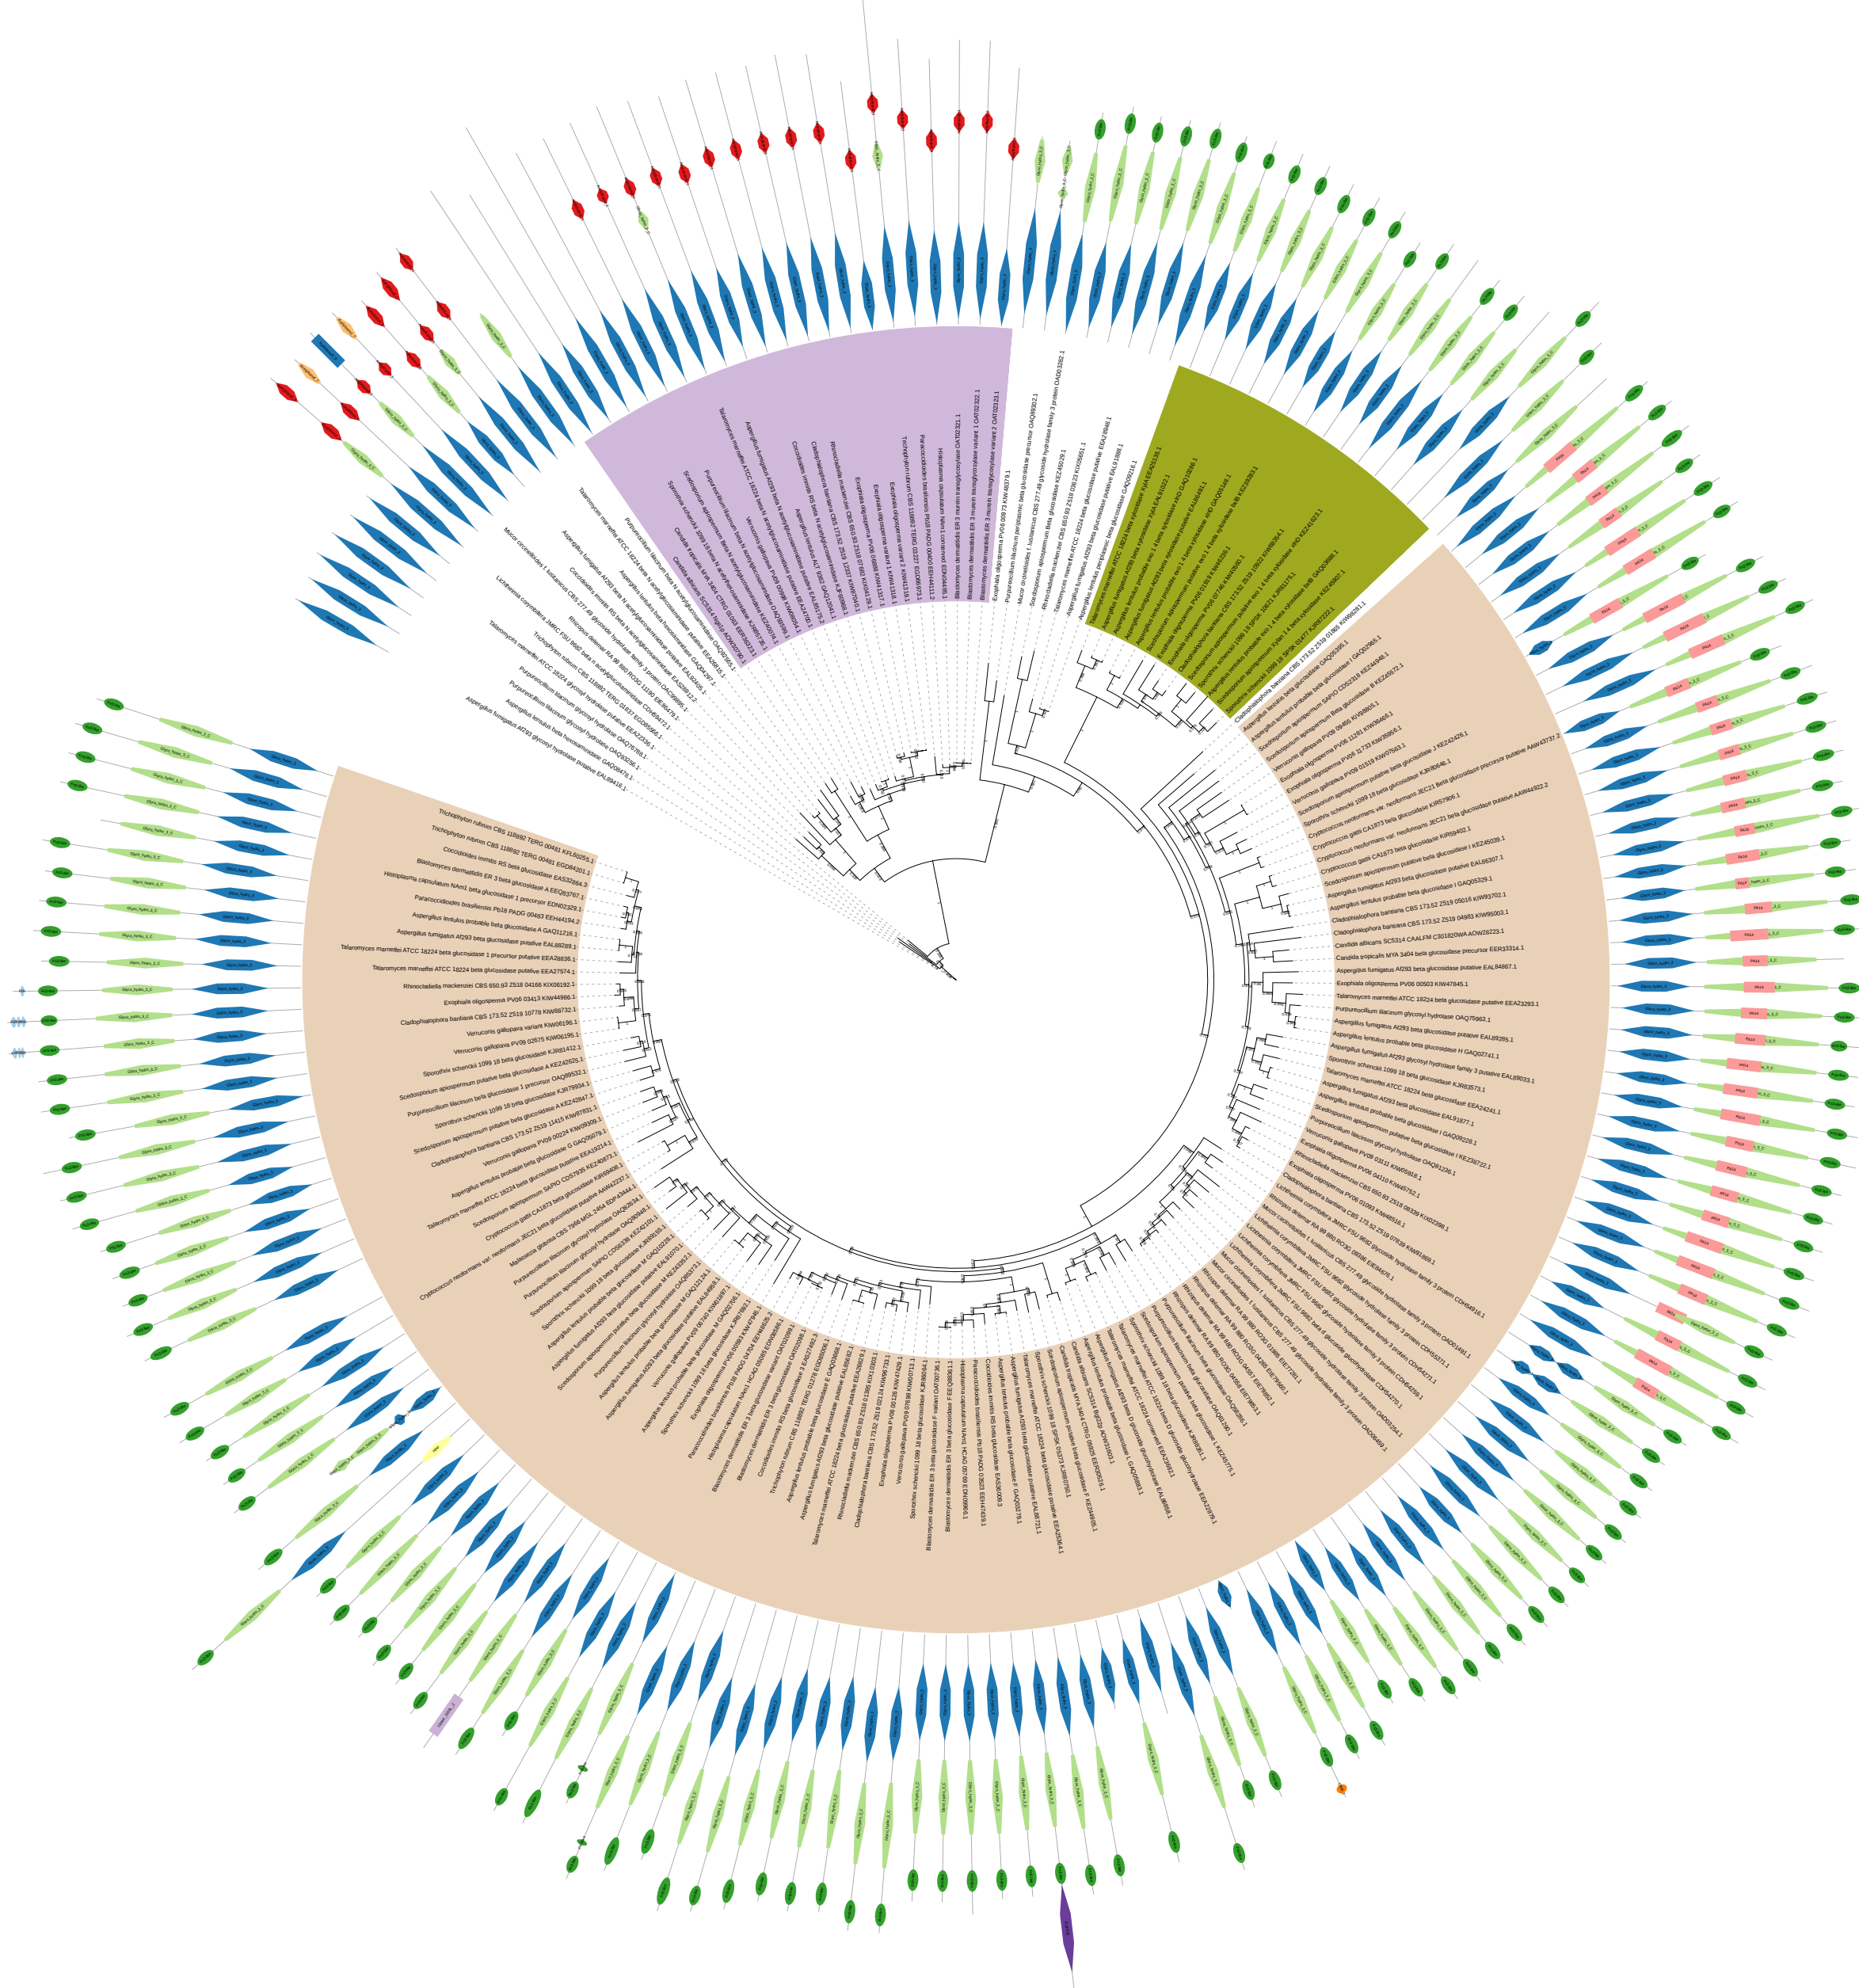

Supplement: s1 [file s1]

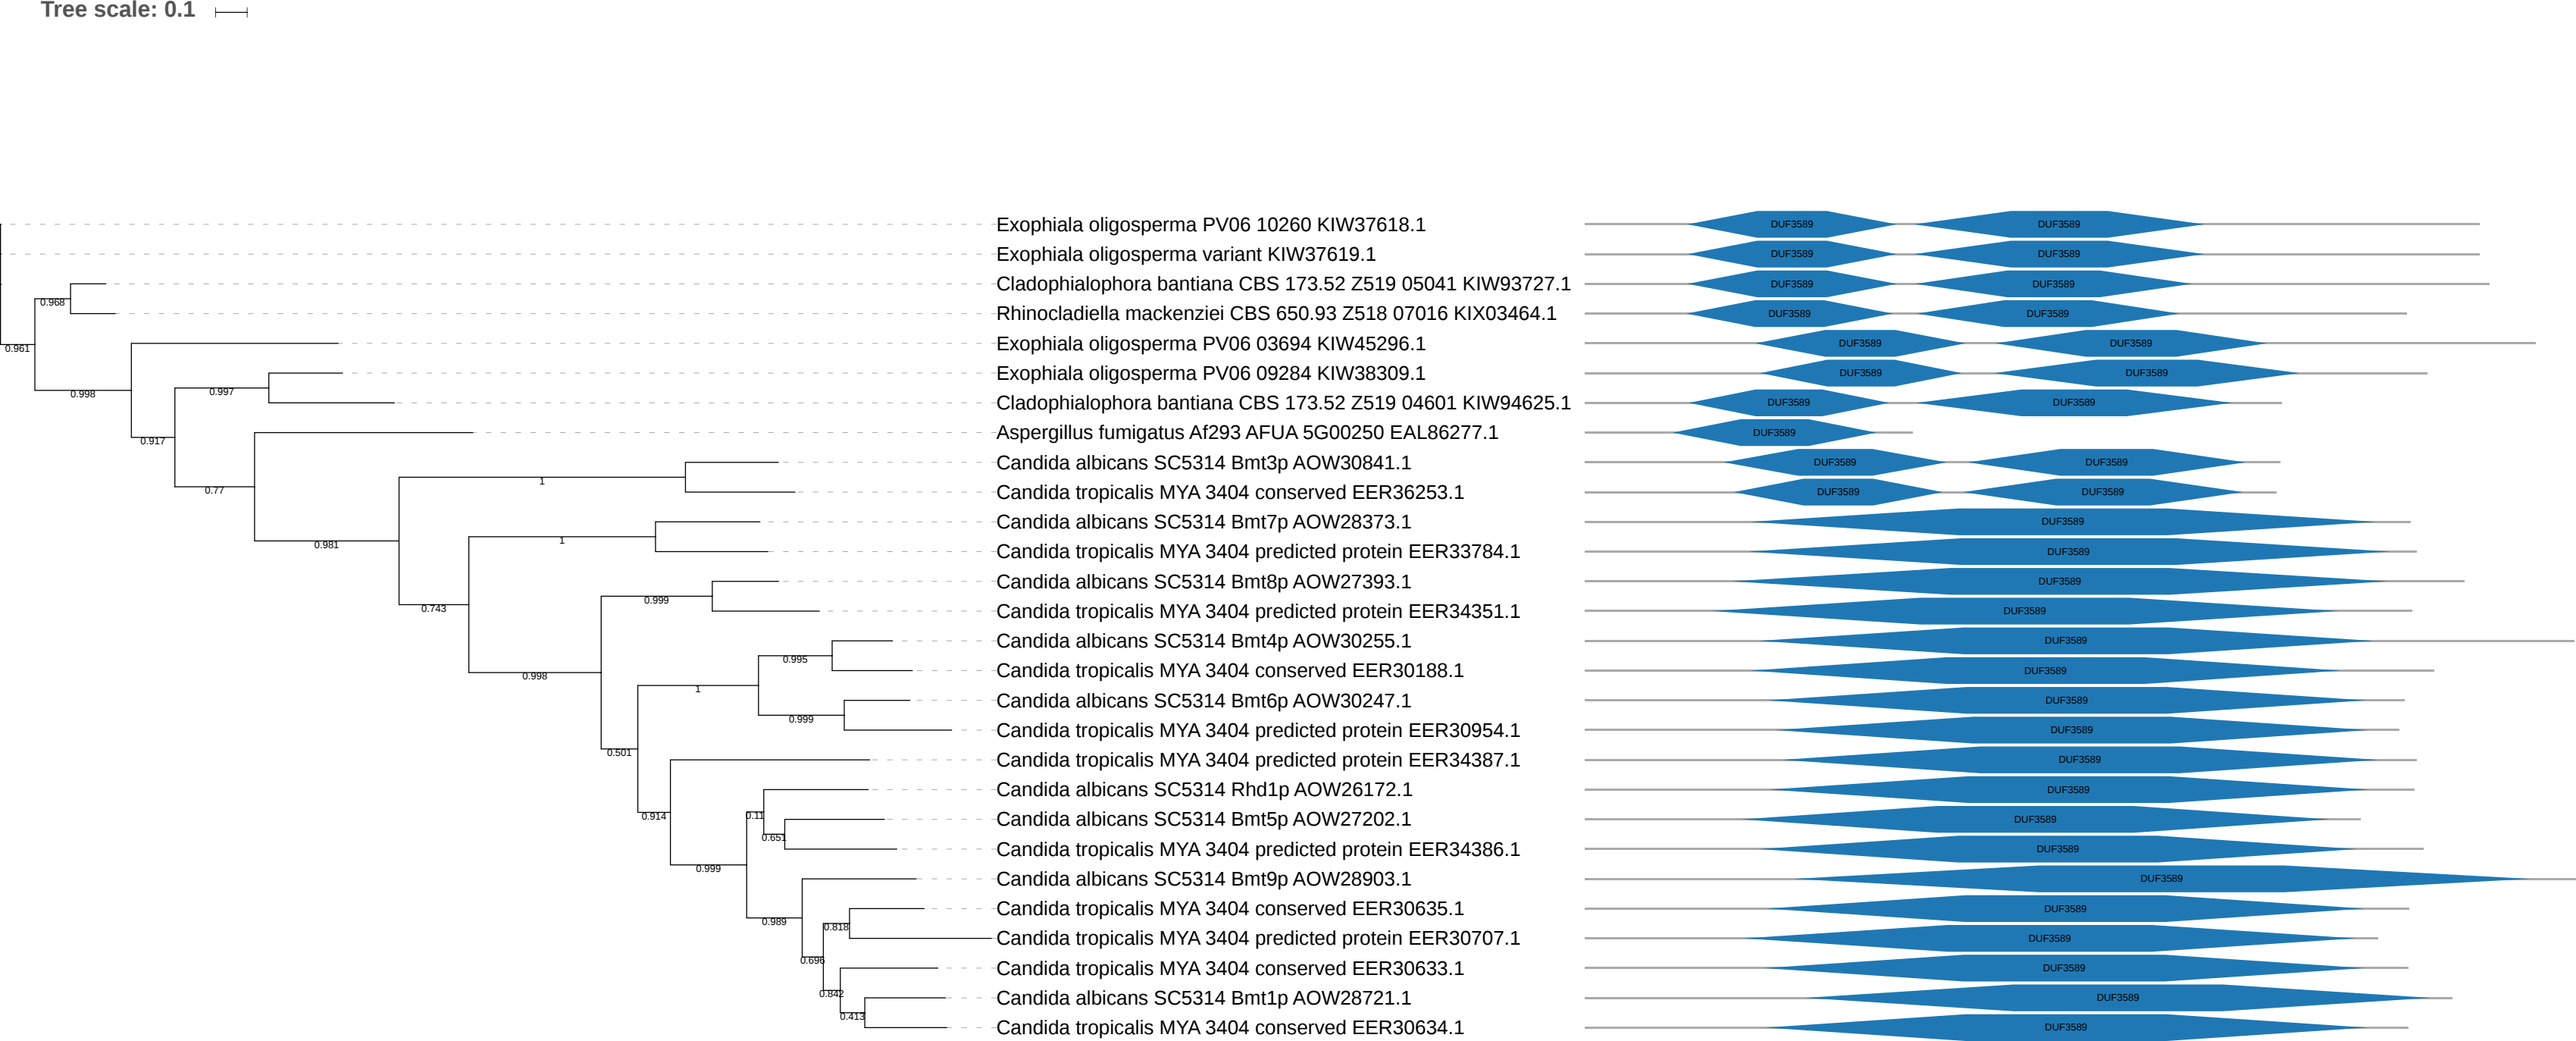

Supplement: s1 [file s1]

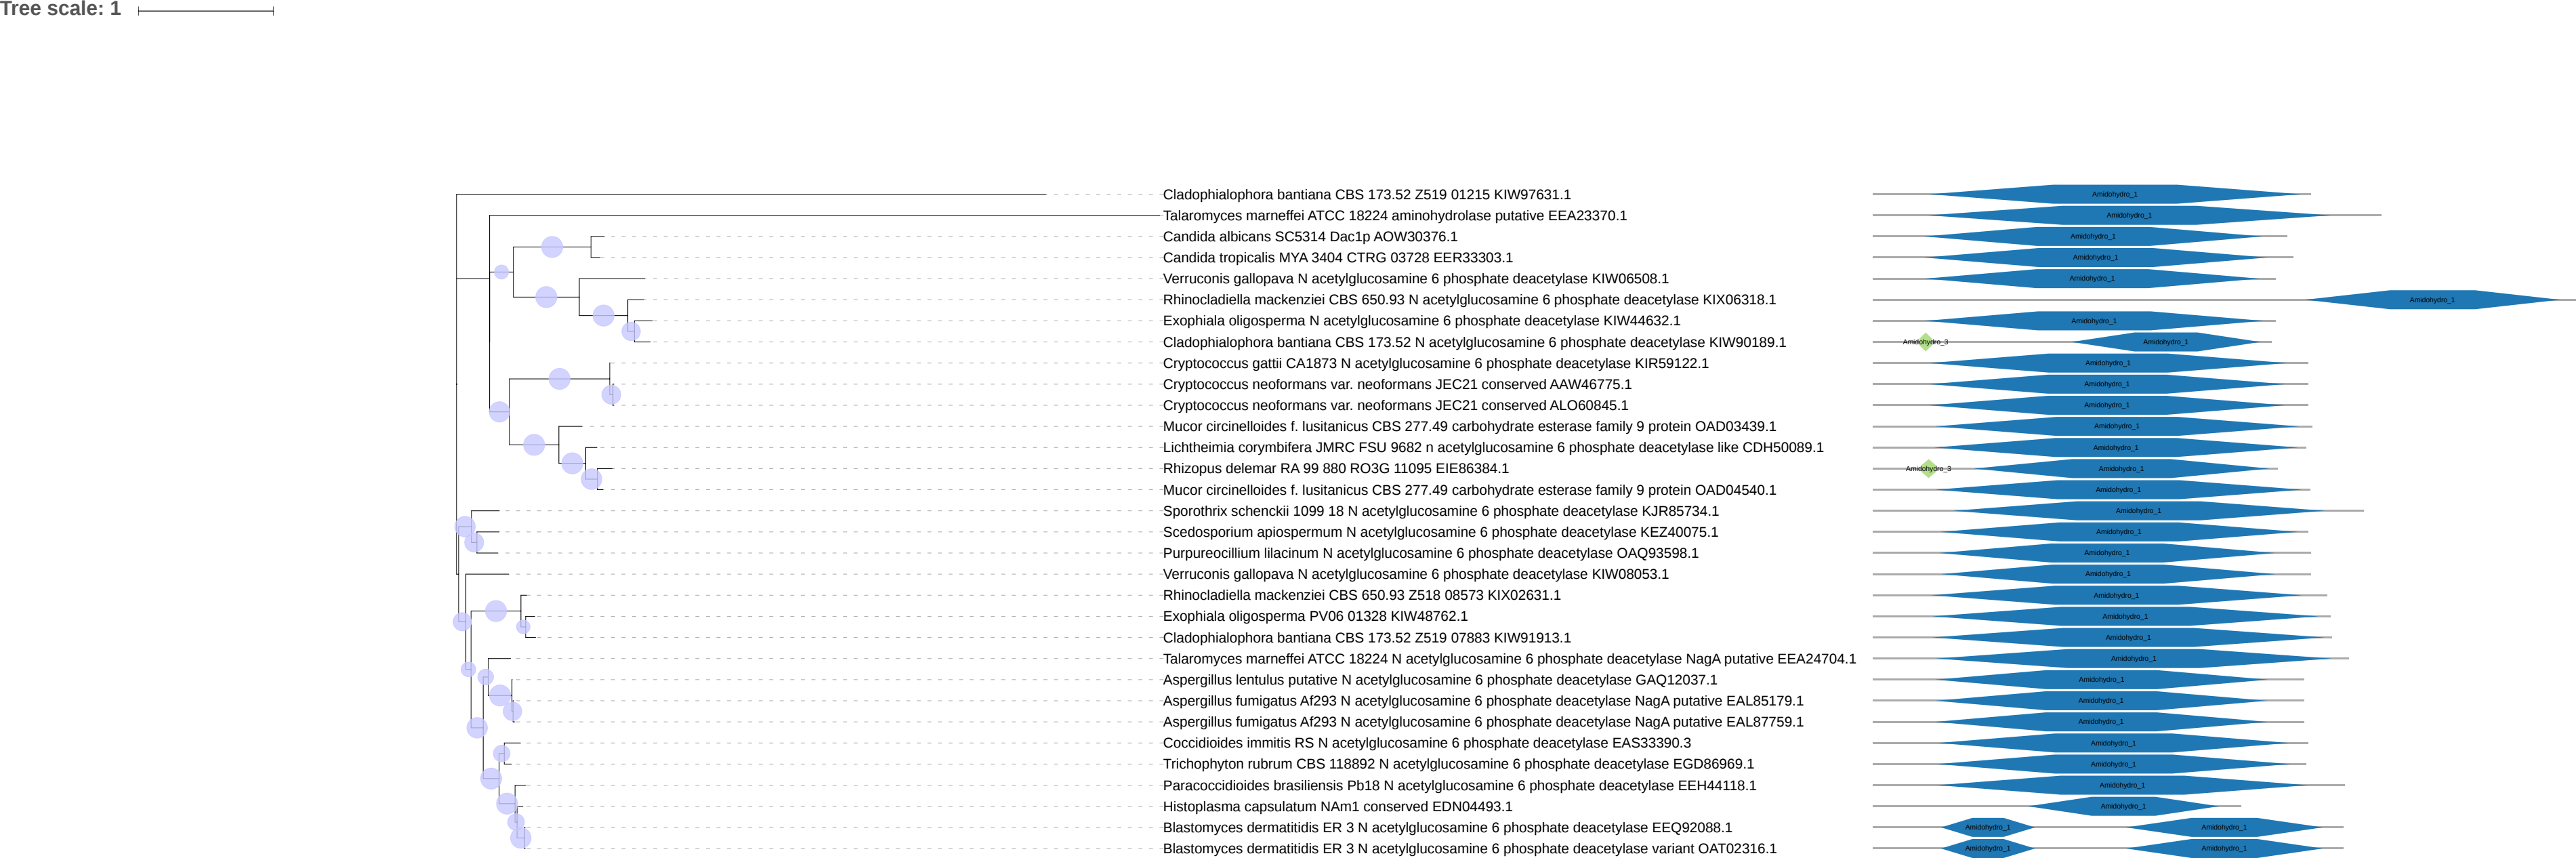

Supplement: s1 [file s1]

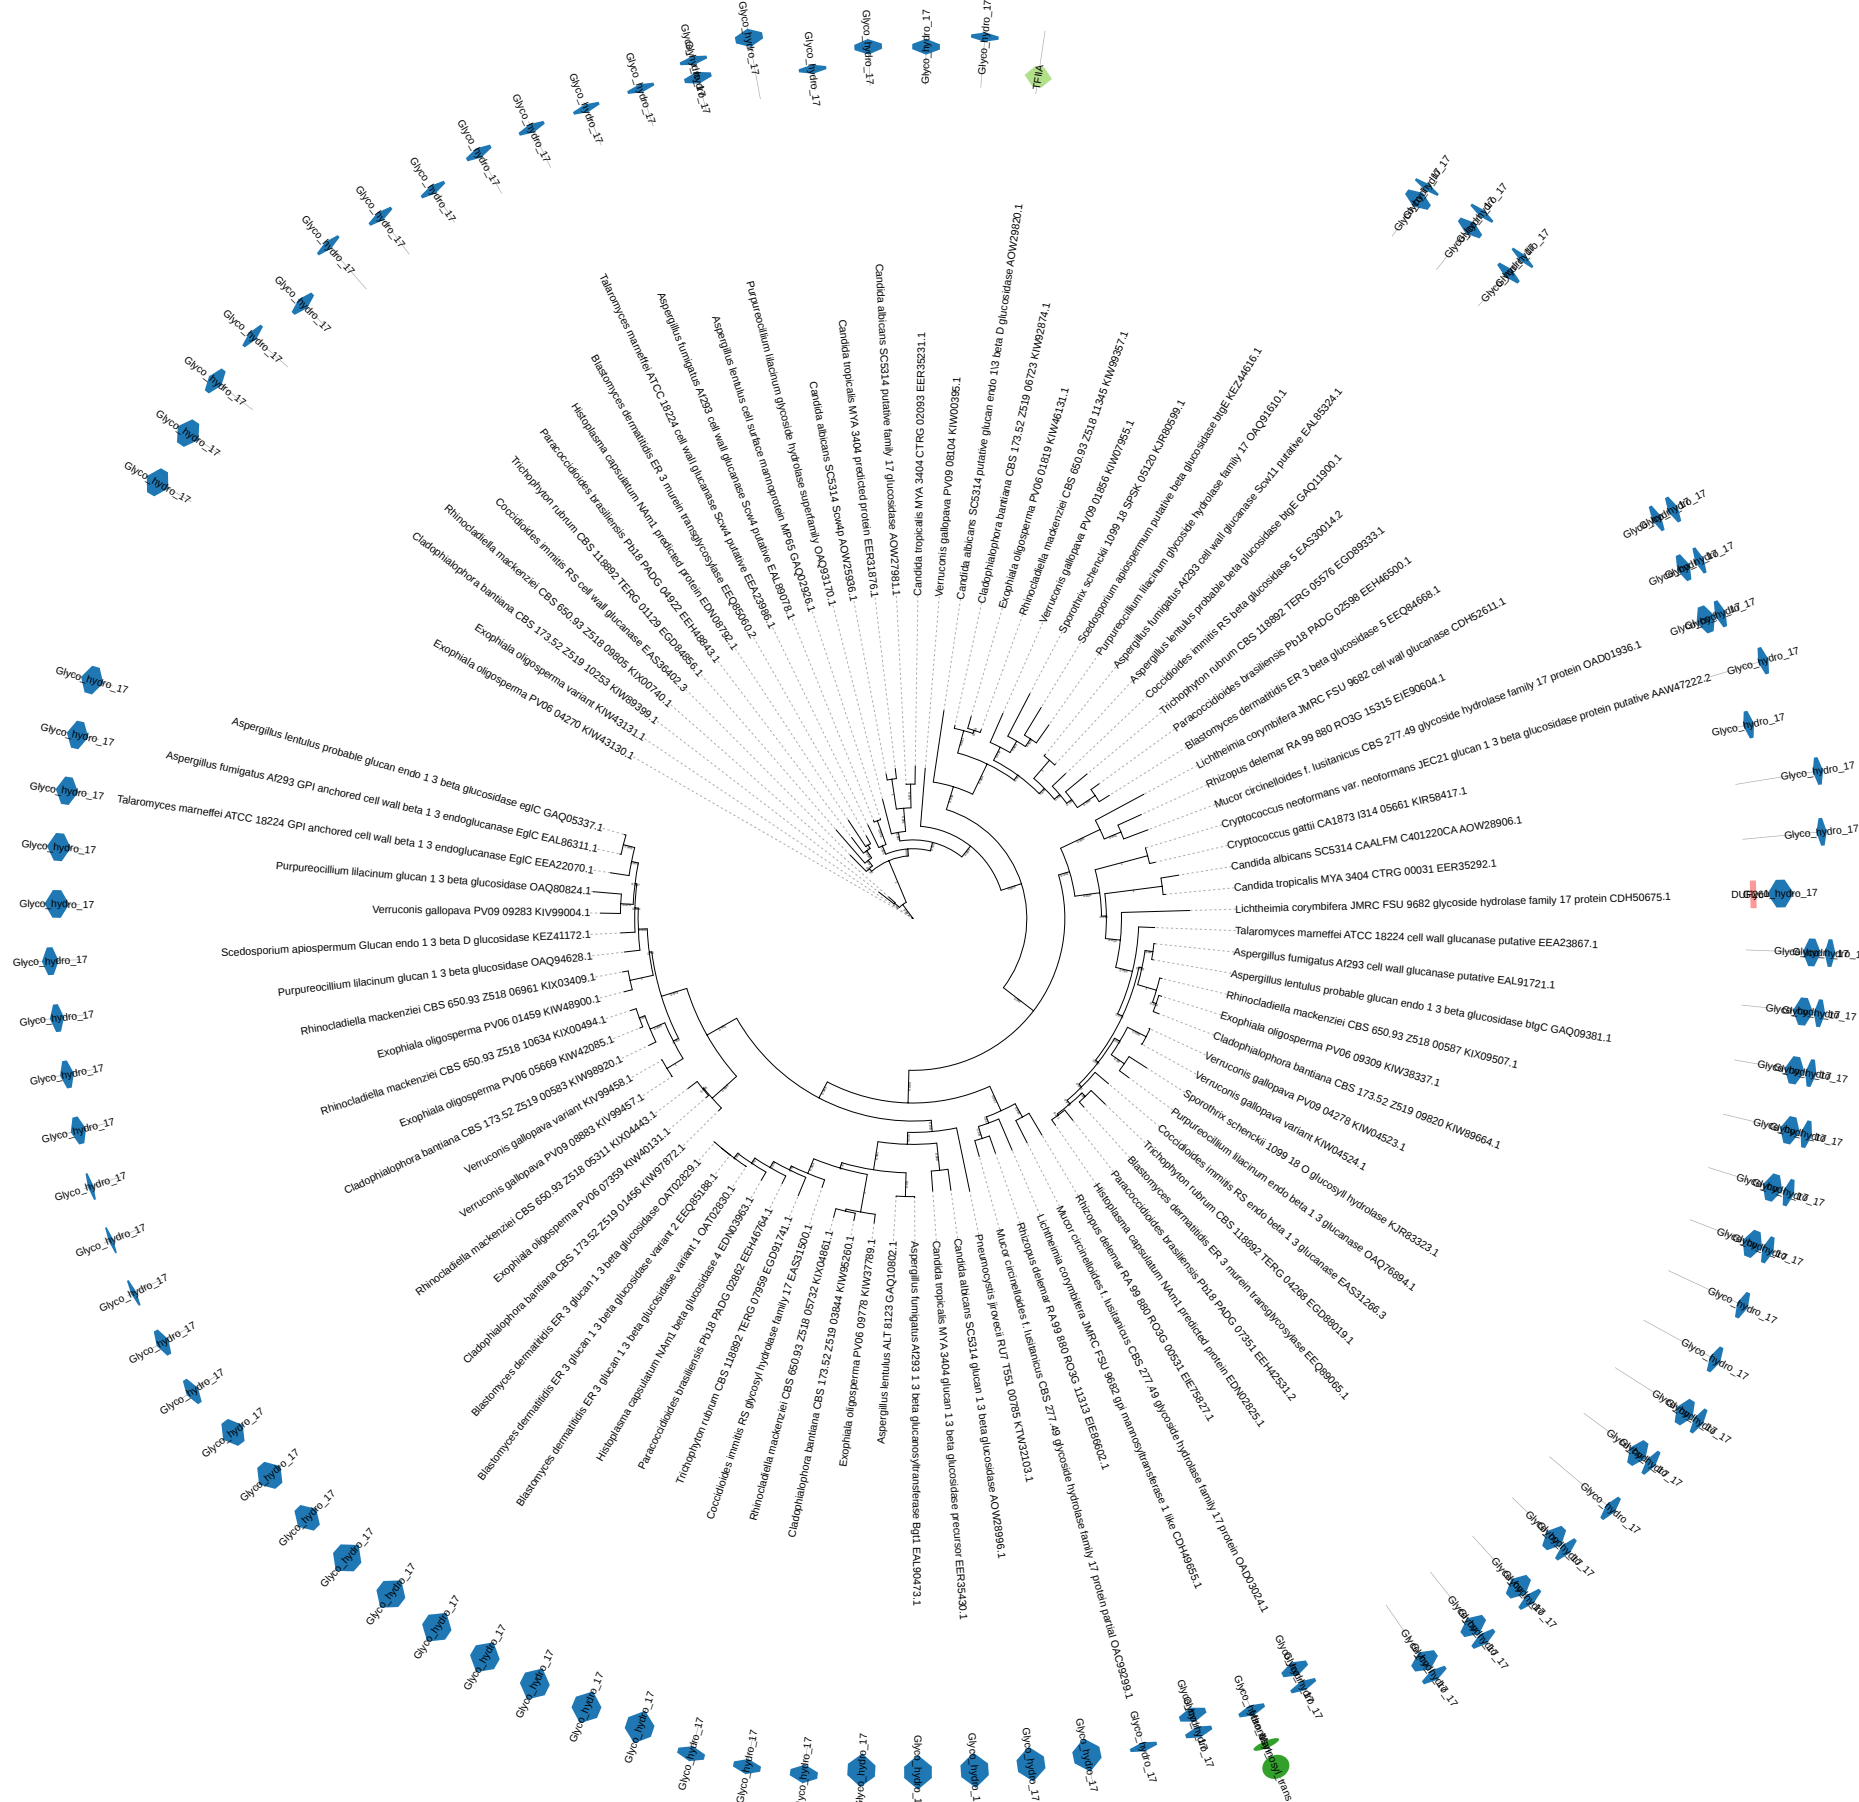

Supplement: s1 [file s1]

Tree scale: 0.1

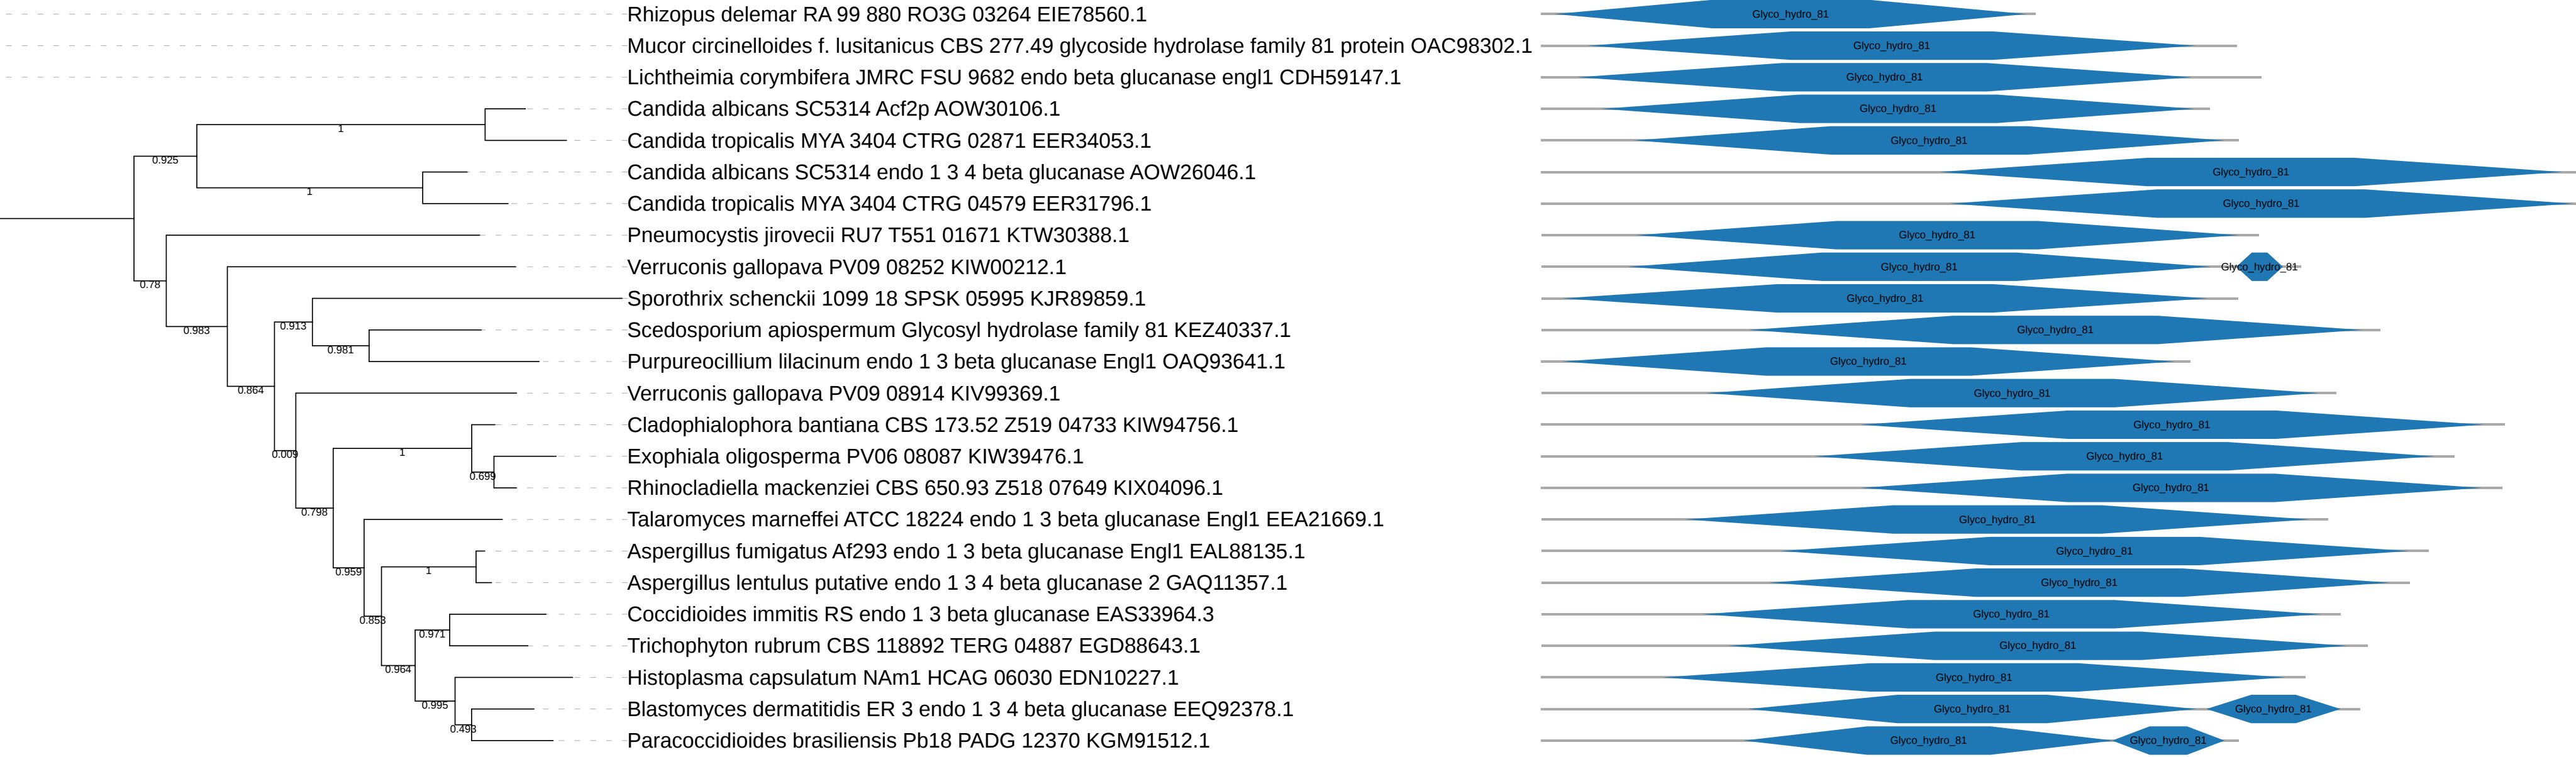

Supplement: s1 [file s1]

Tree scale: 0.1

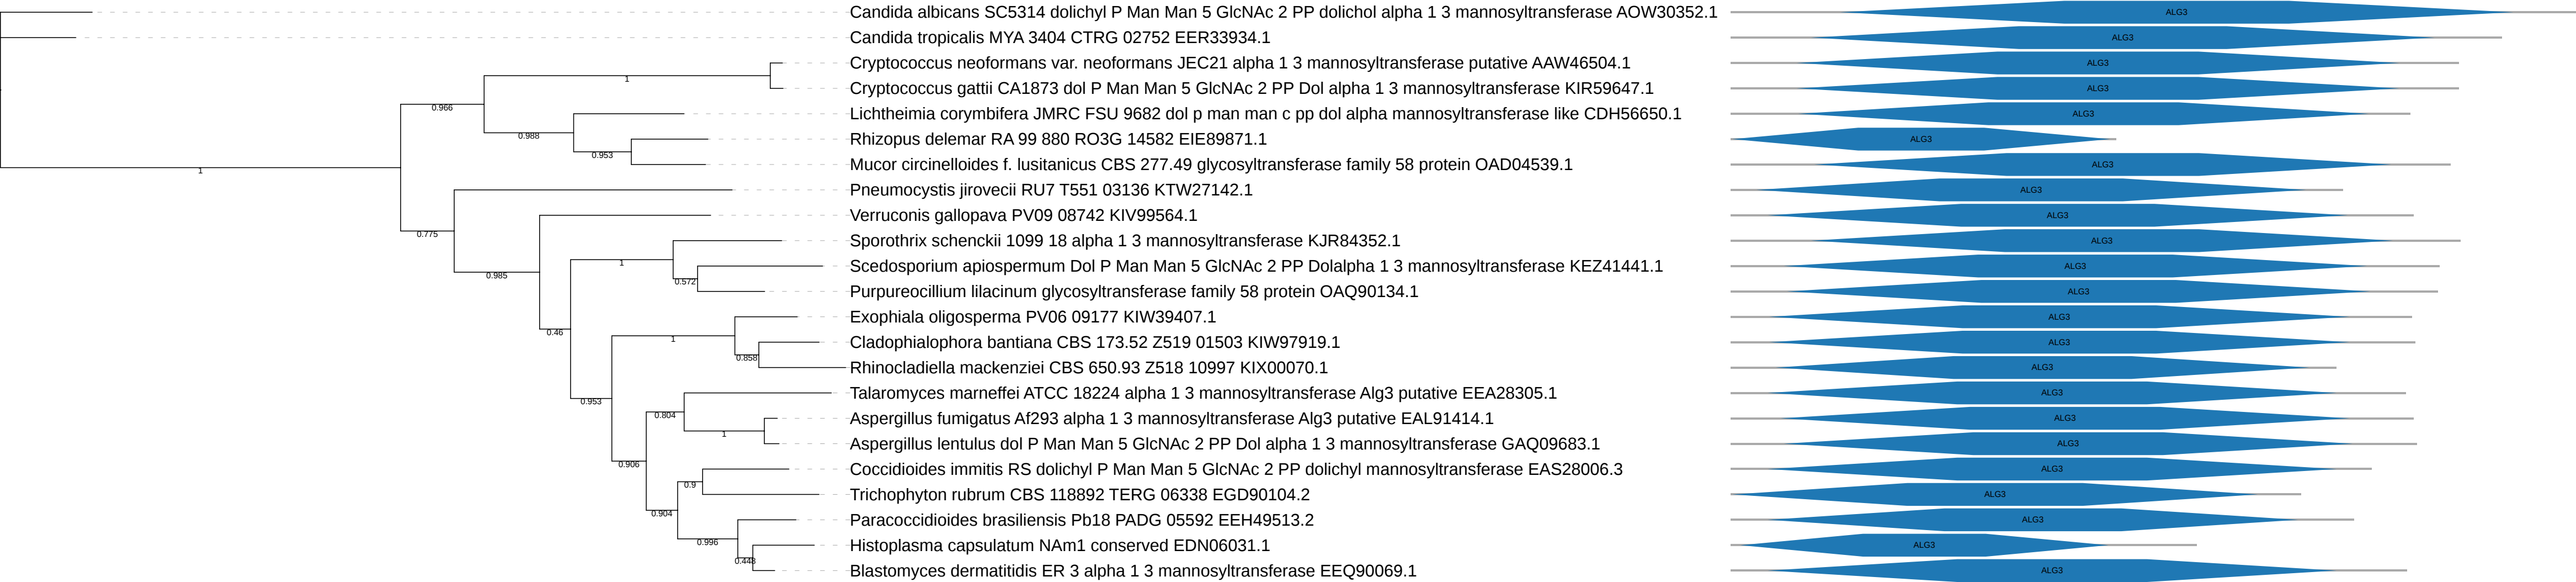

Supplement: s1 [file s1]

Tree scale: 1

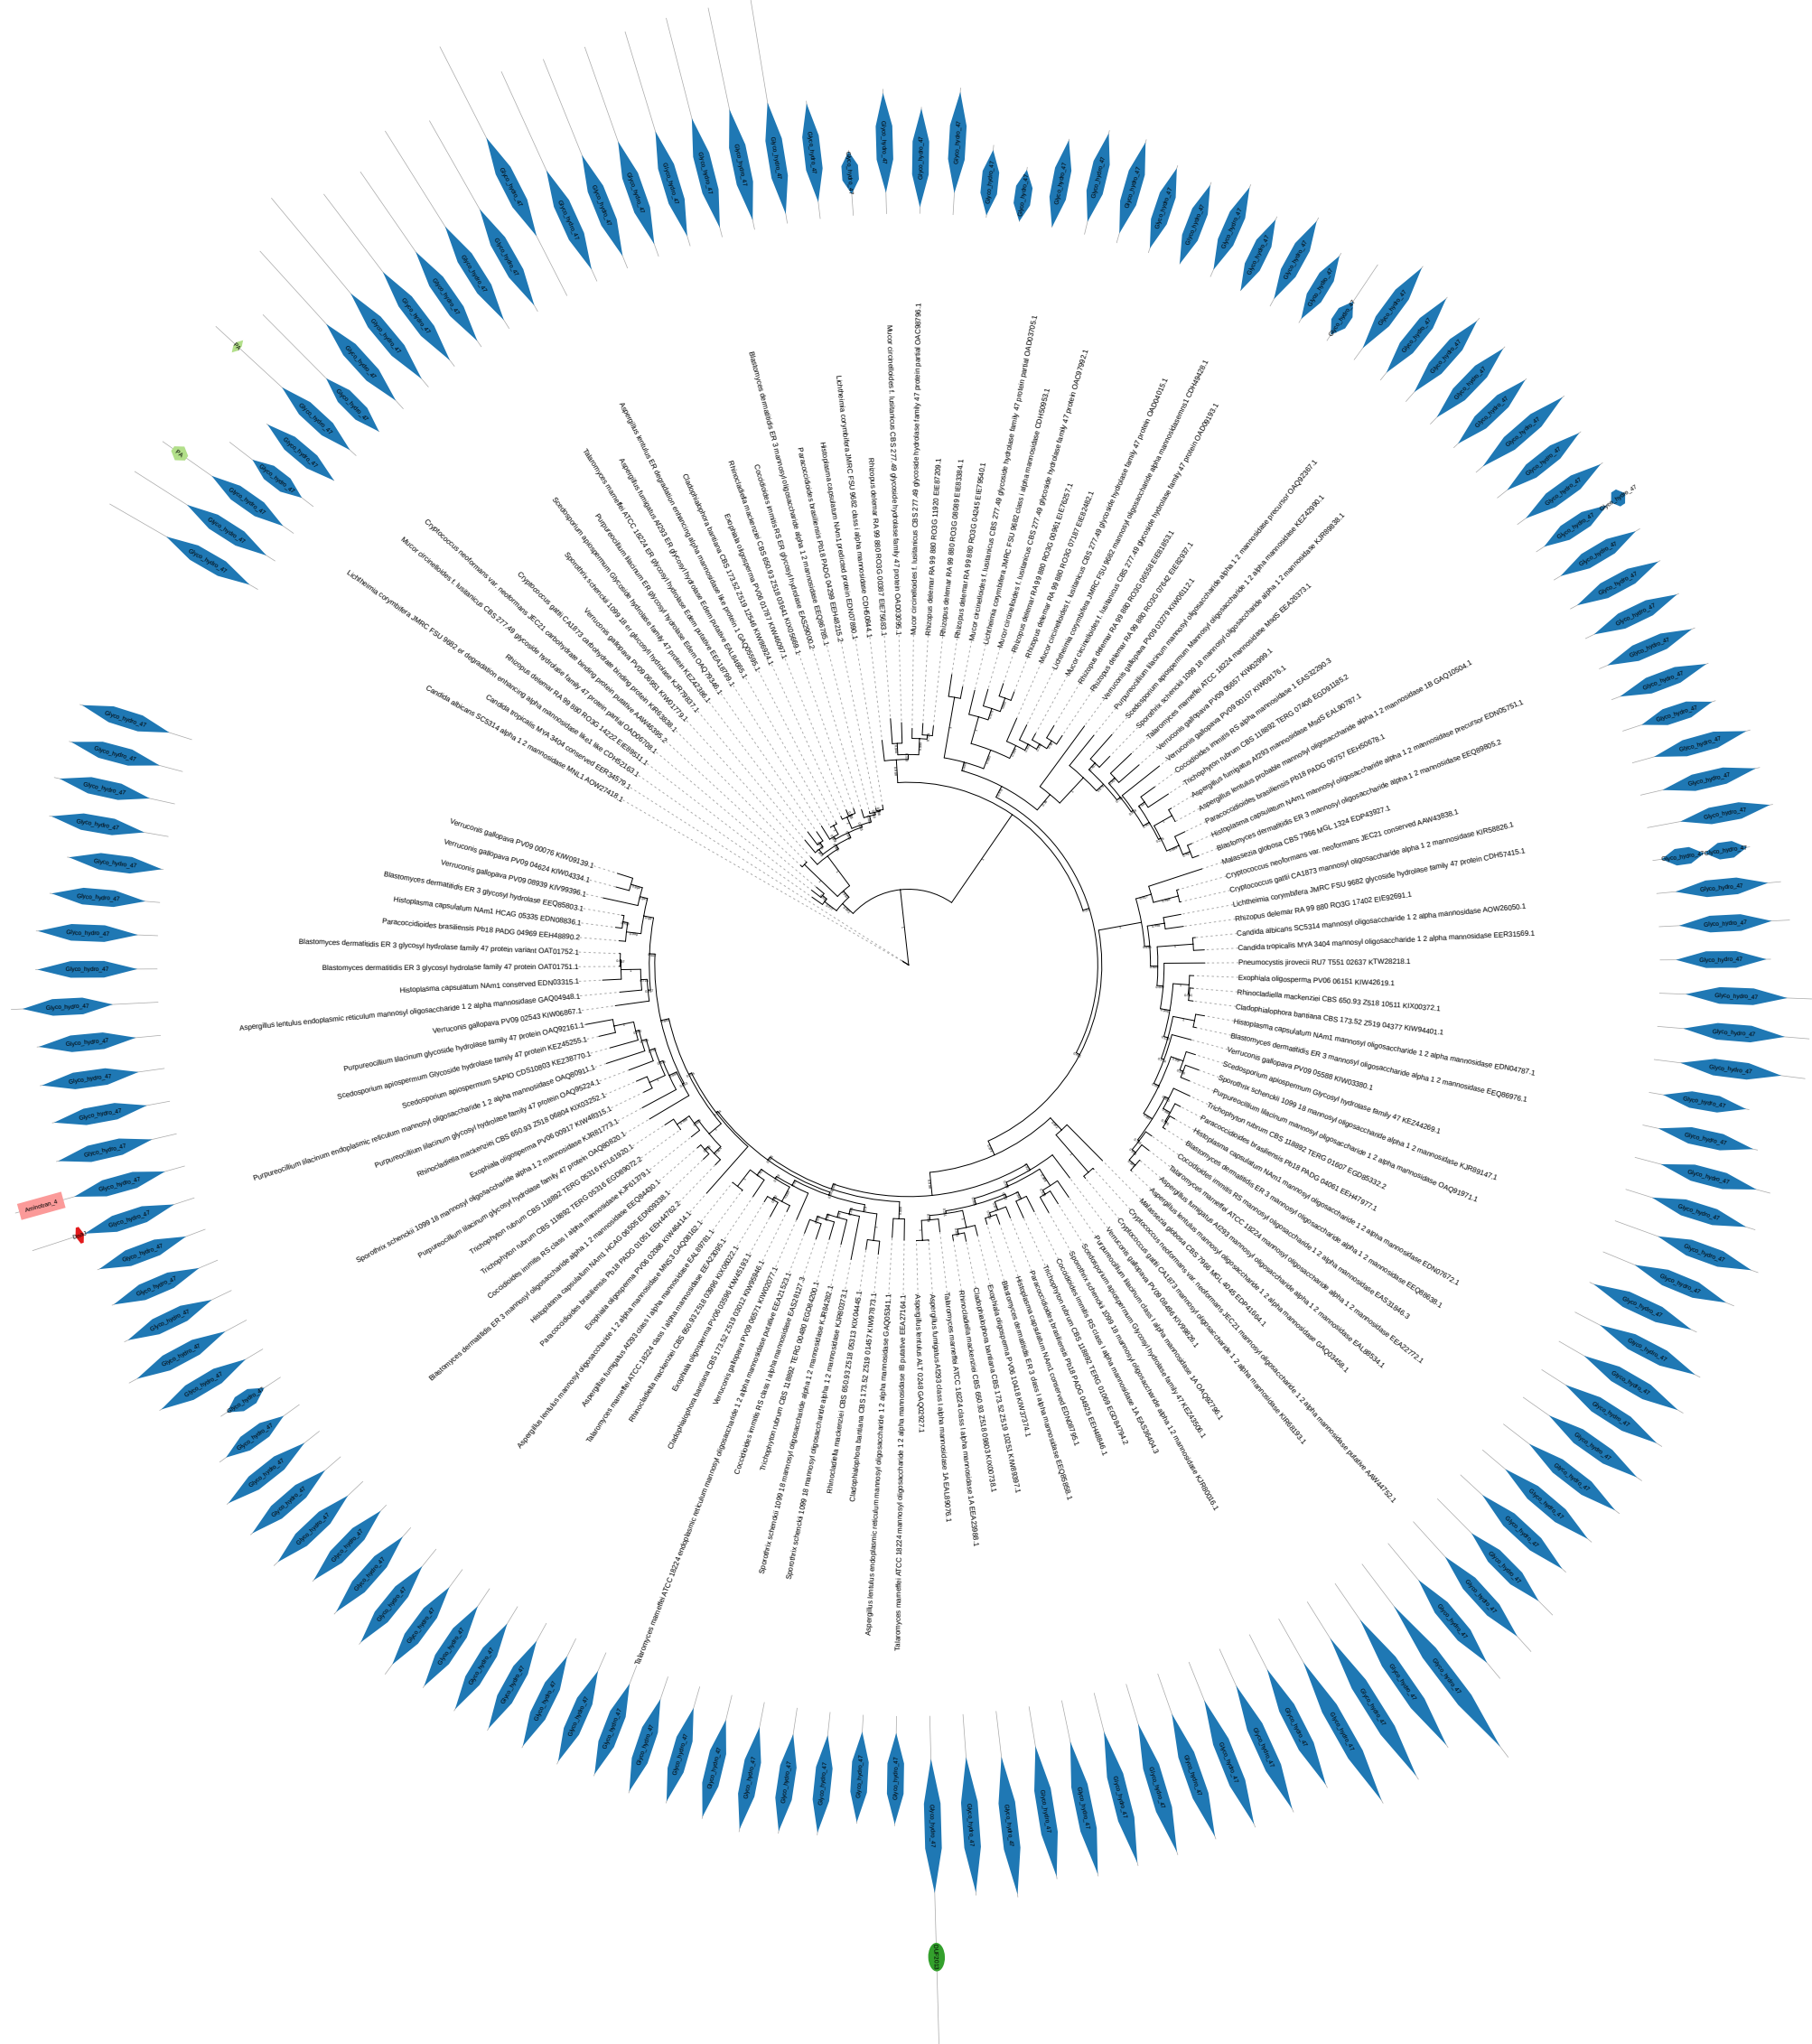

Supplement: s1 [file s1]

Tree scale: 1

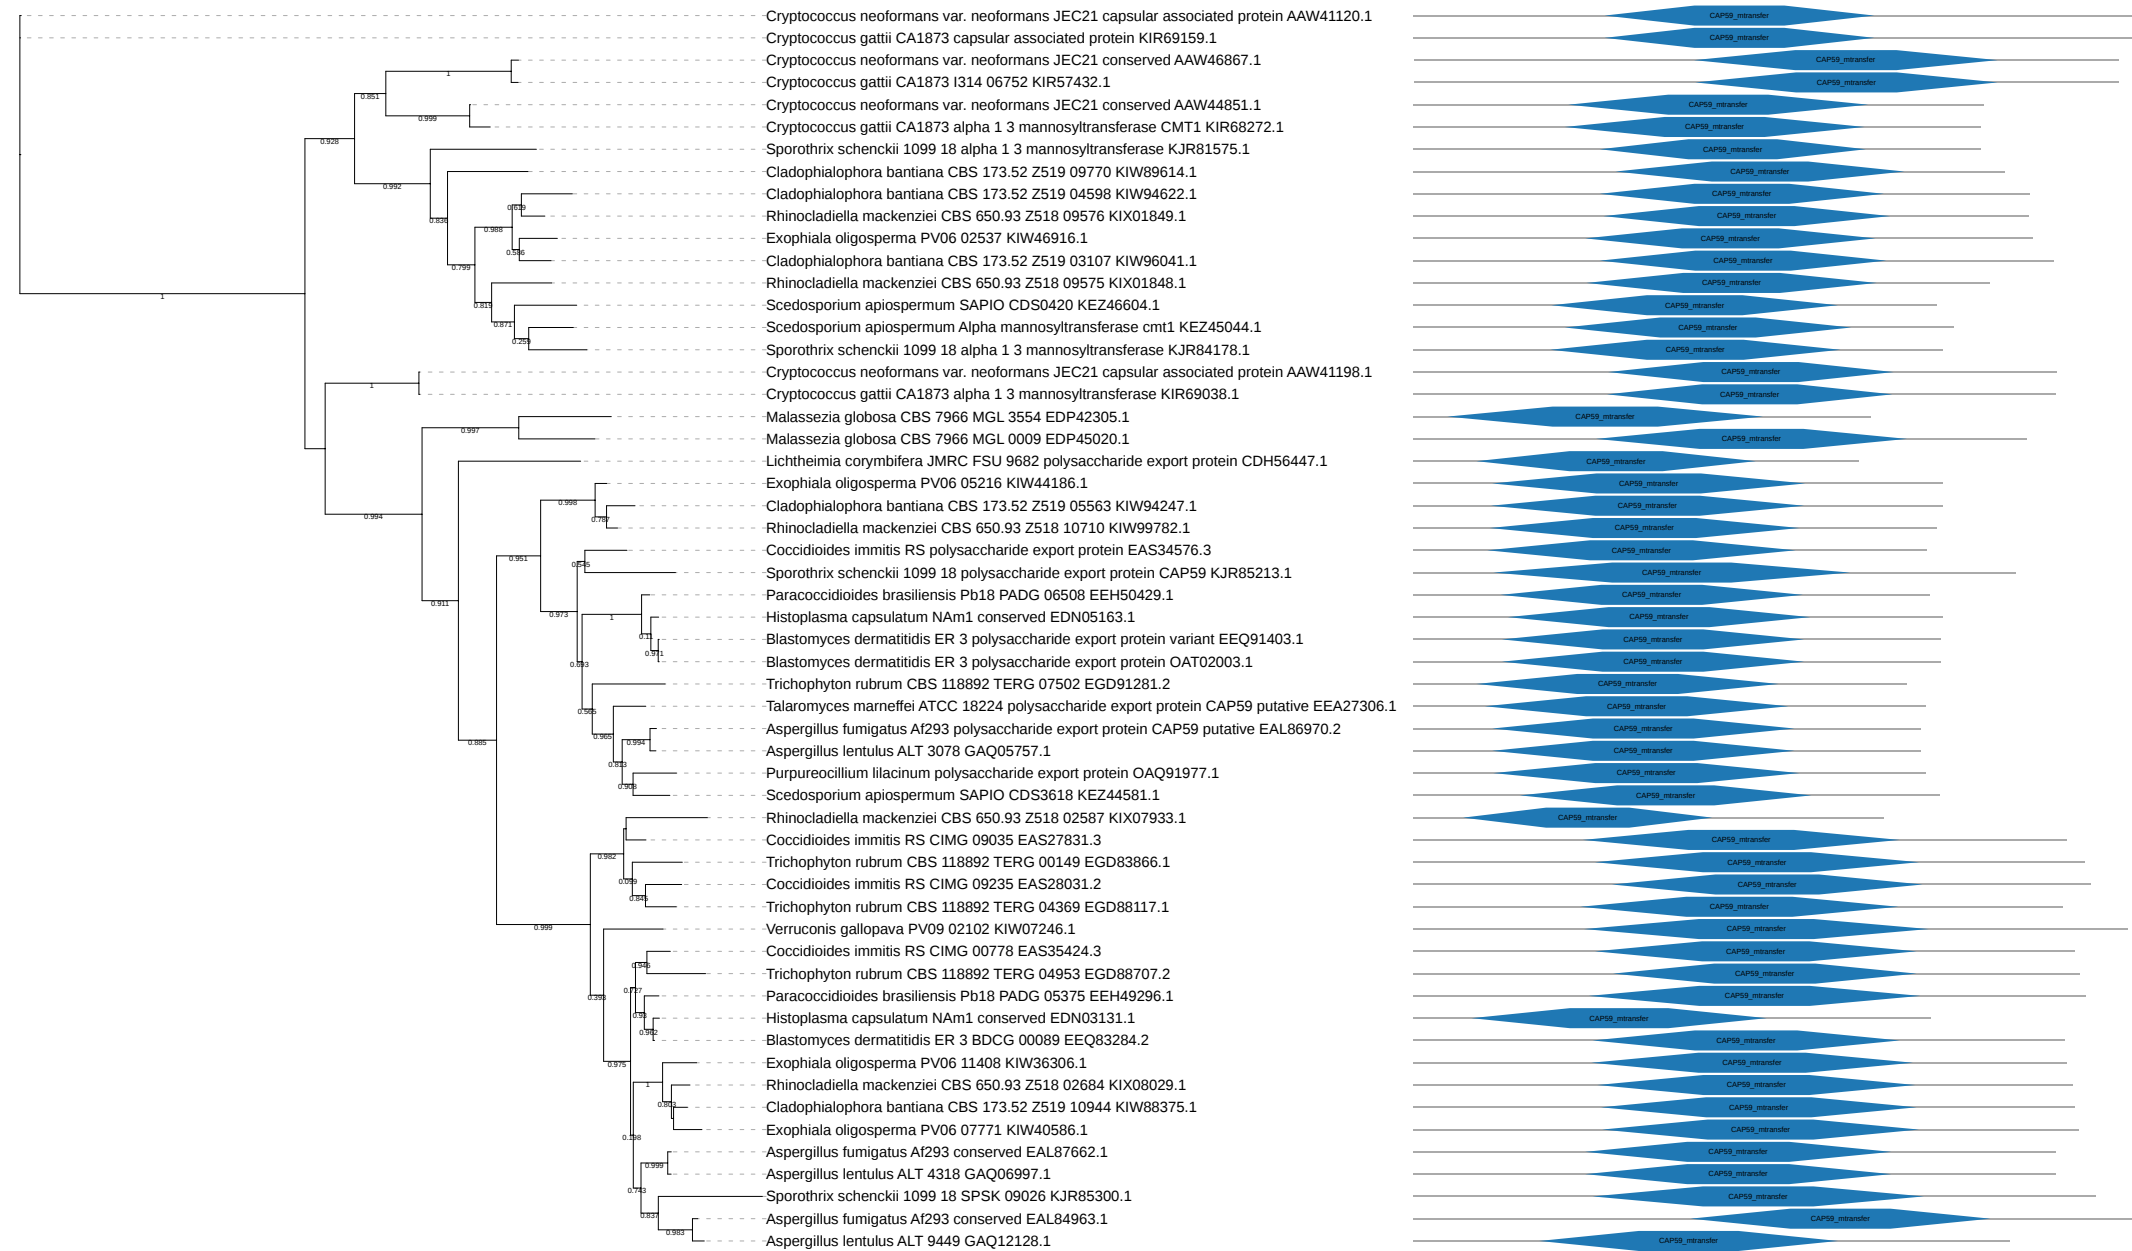

Supplement: s1 [file s1]

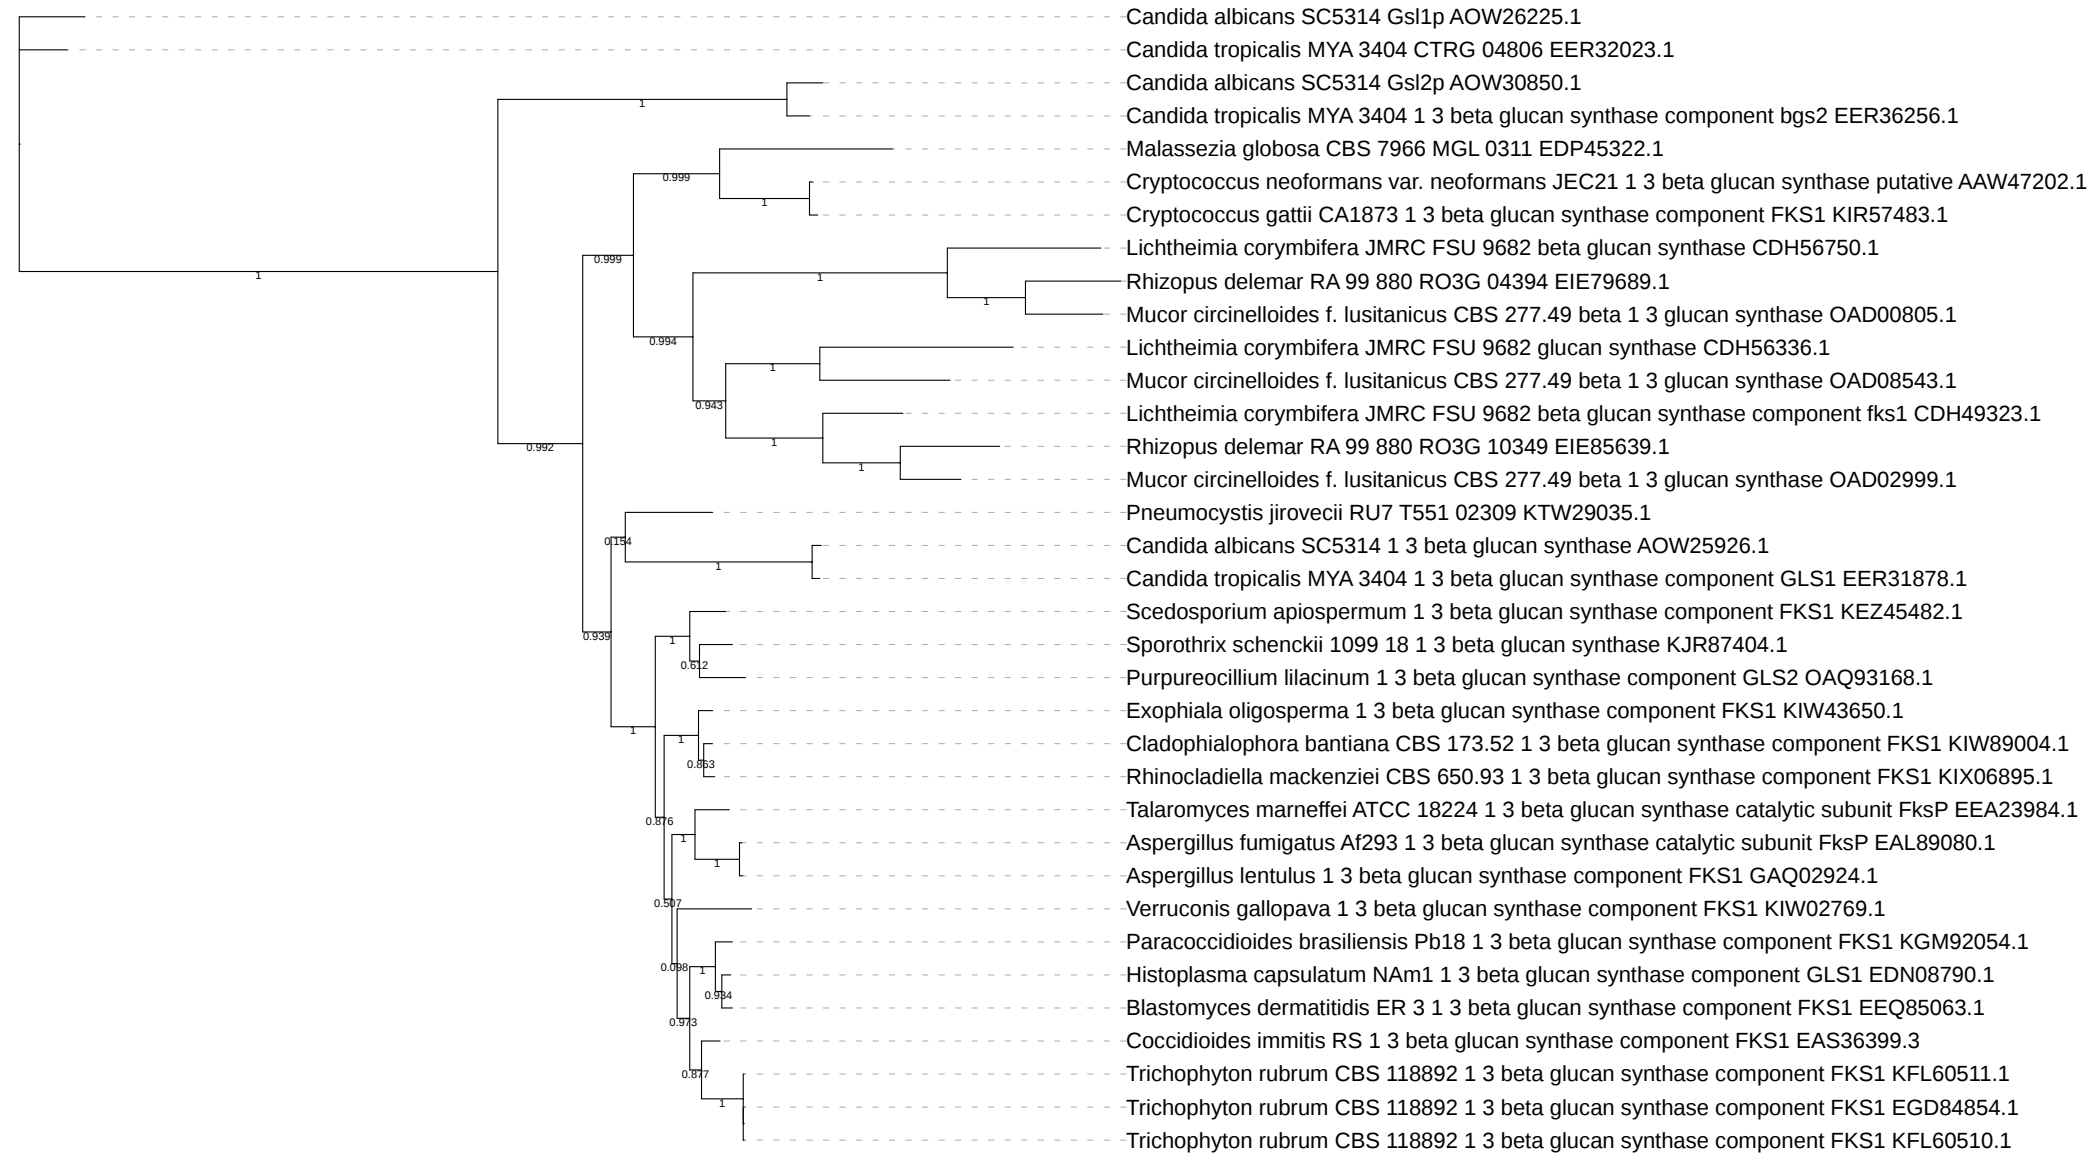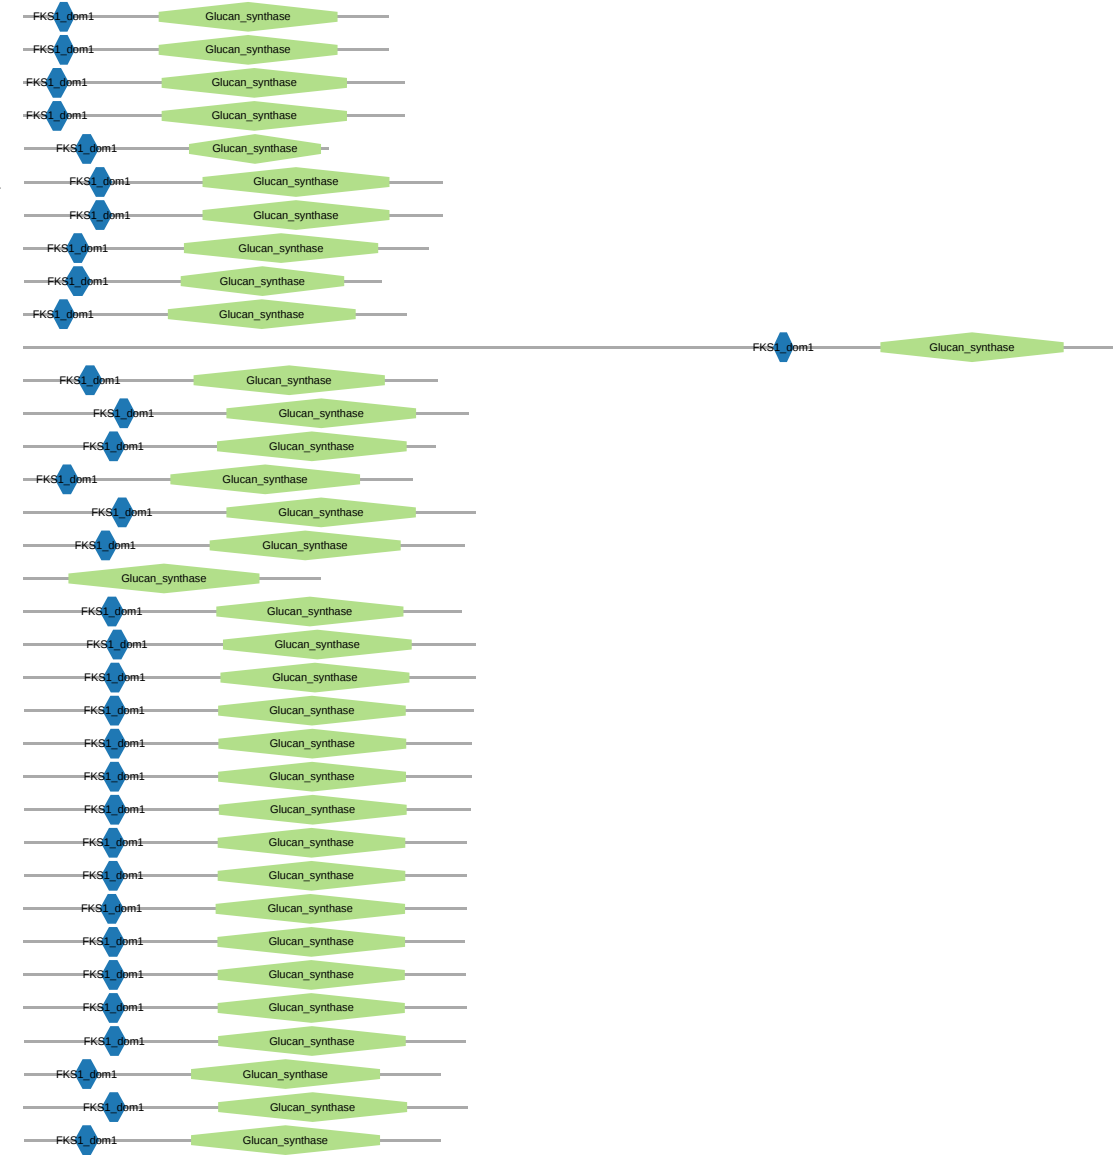

Supplement: s1 [file s1]

Tree scale: 0.1

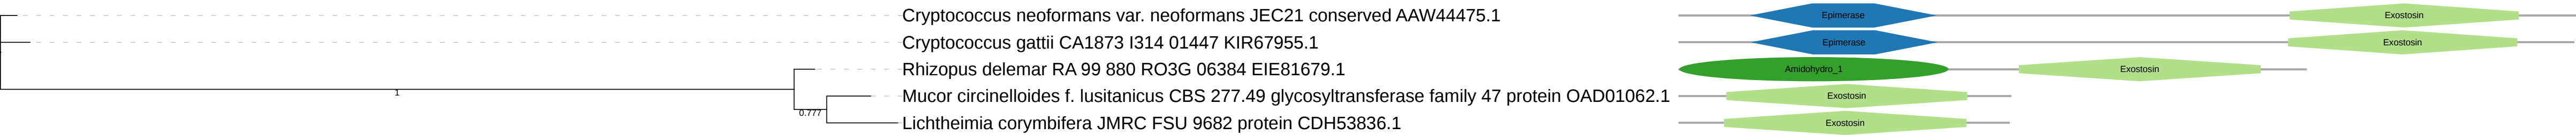

Supplement: s1 [file s1]

Tree scale: 1

## Colored ranges

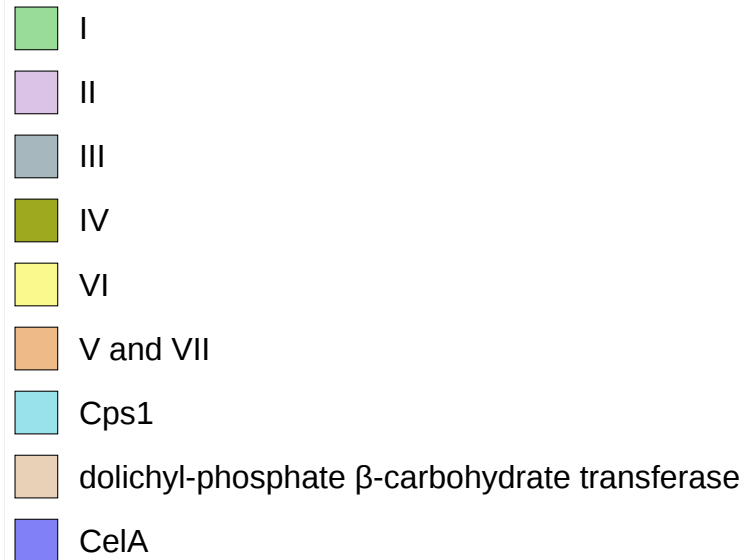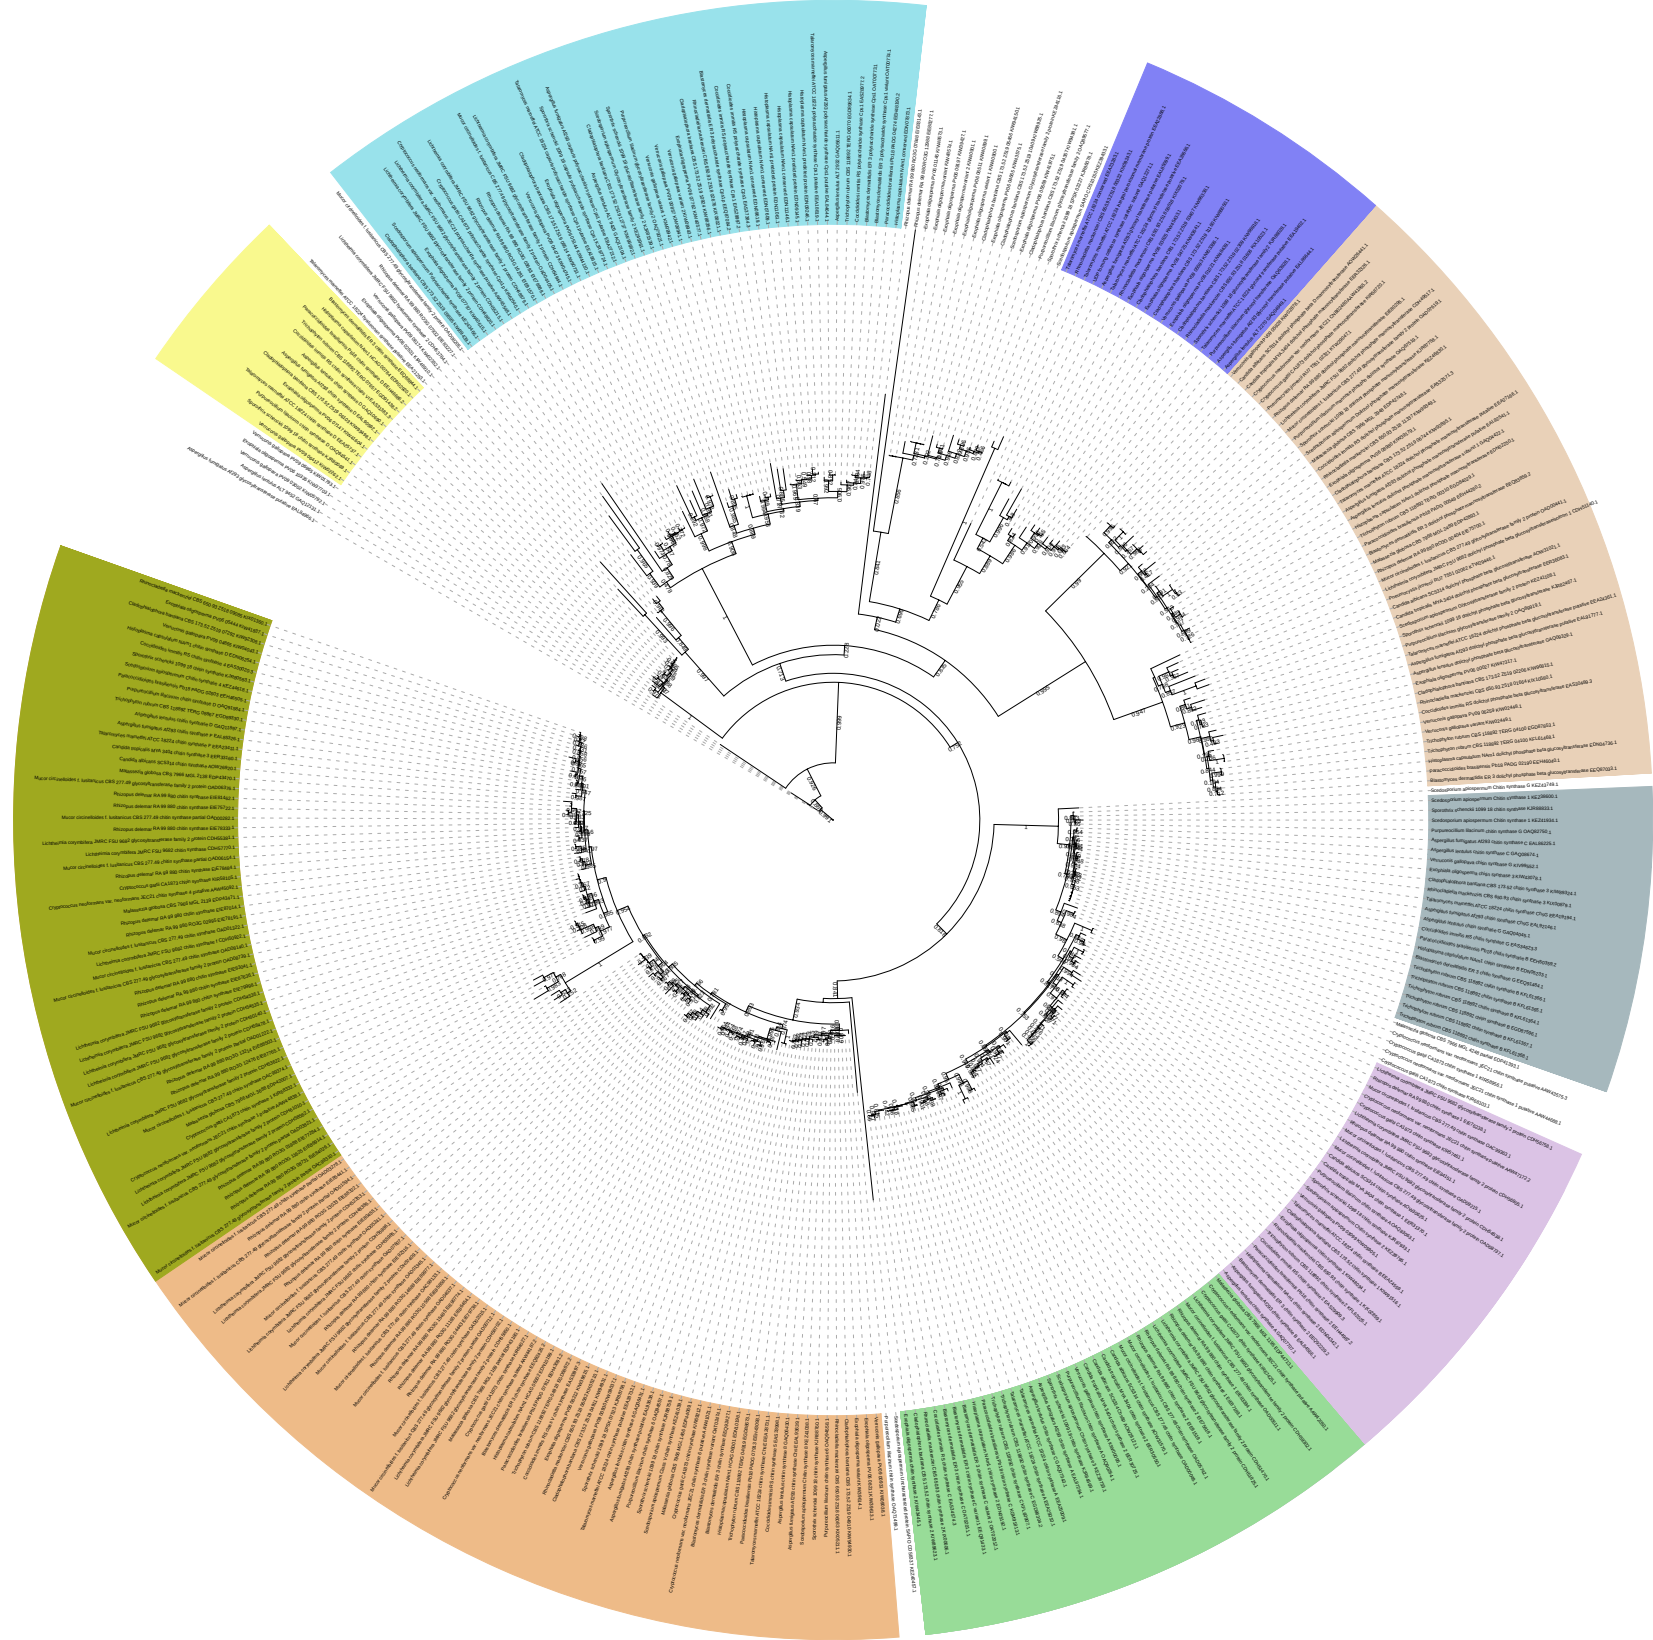

Supplement: s1 [file s1]

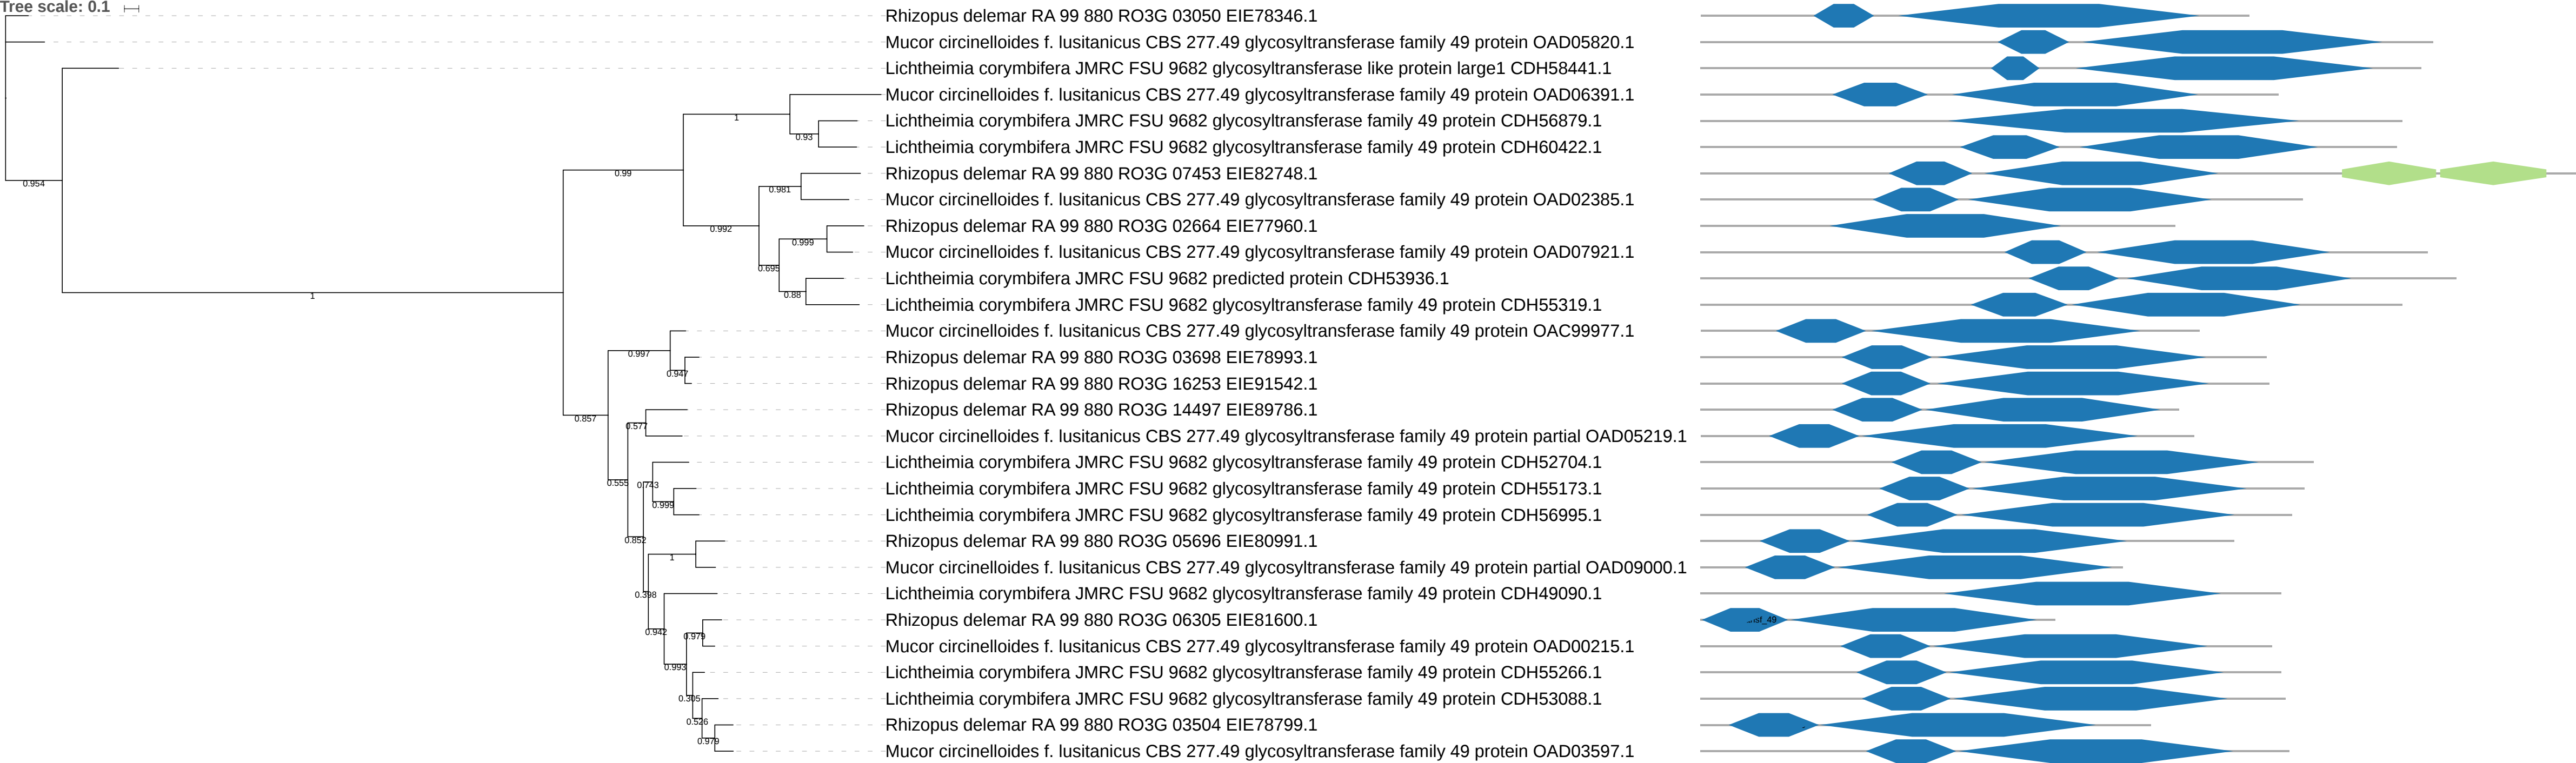

Supplement: s1 [file s1]

Tree scale: 0.1

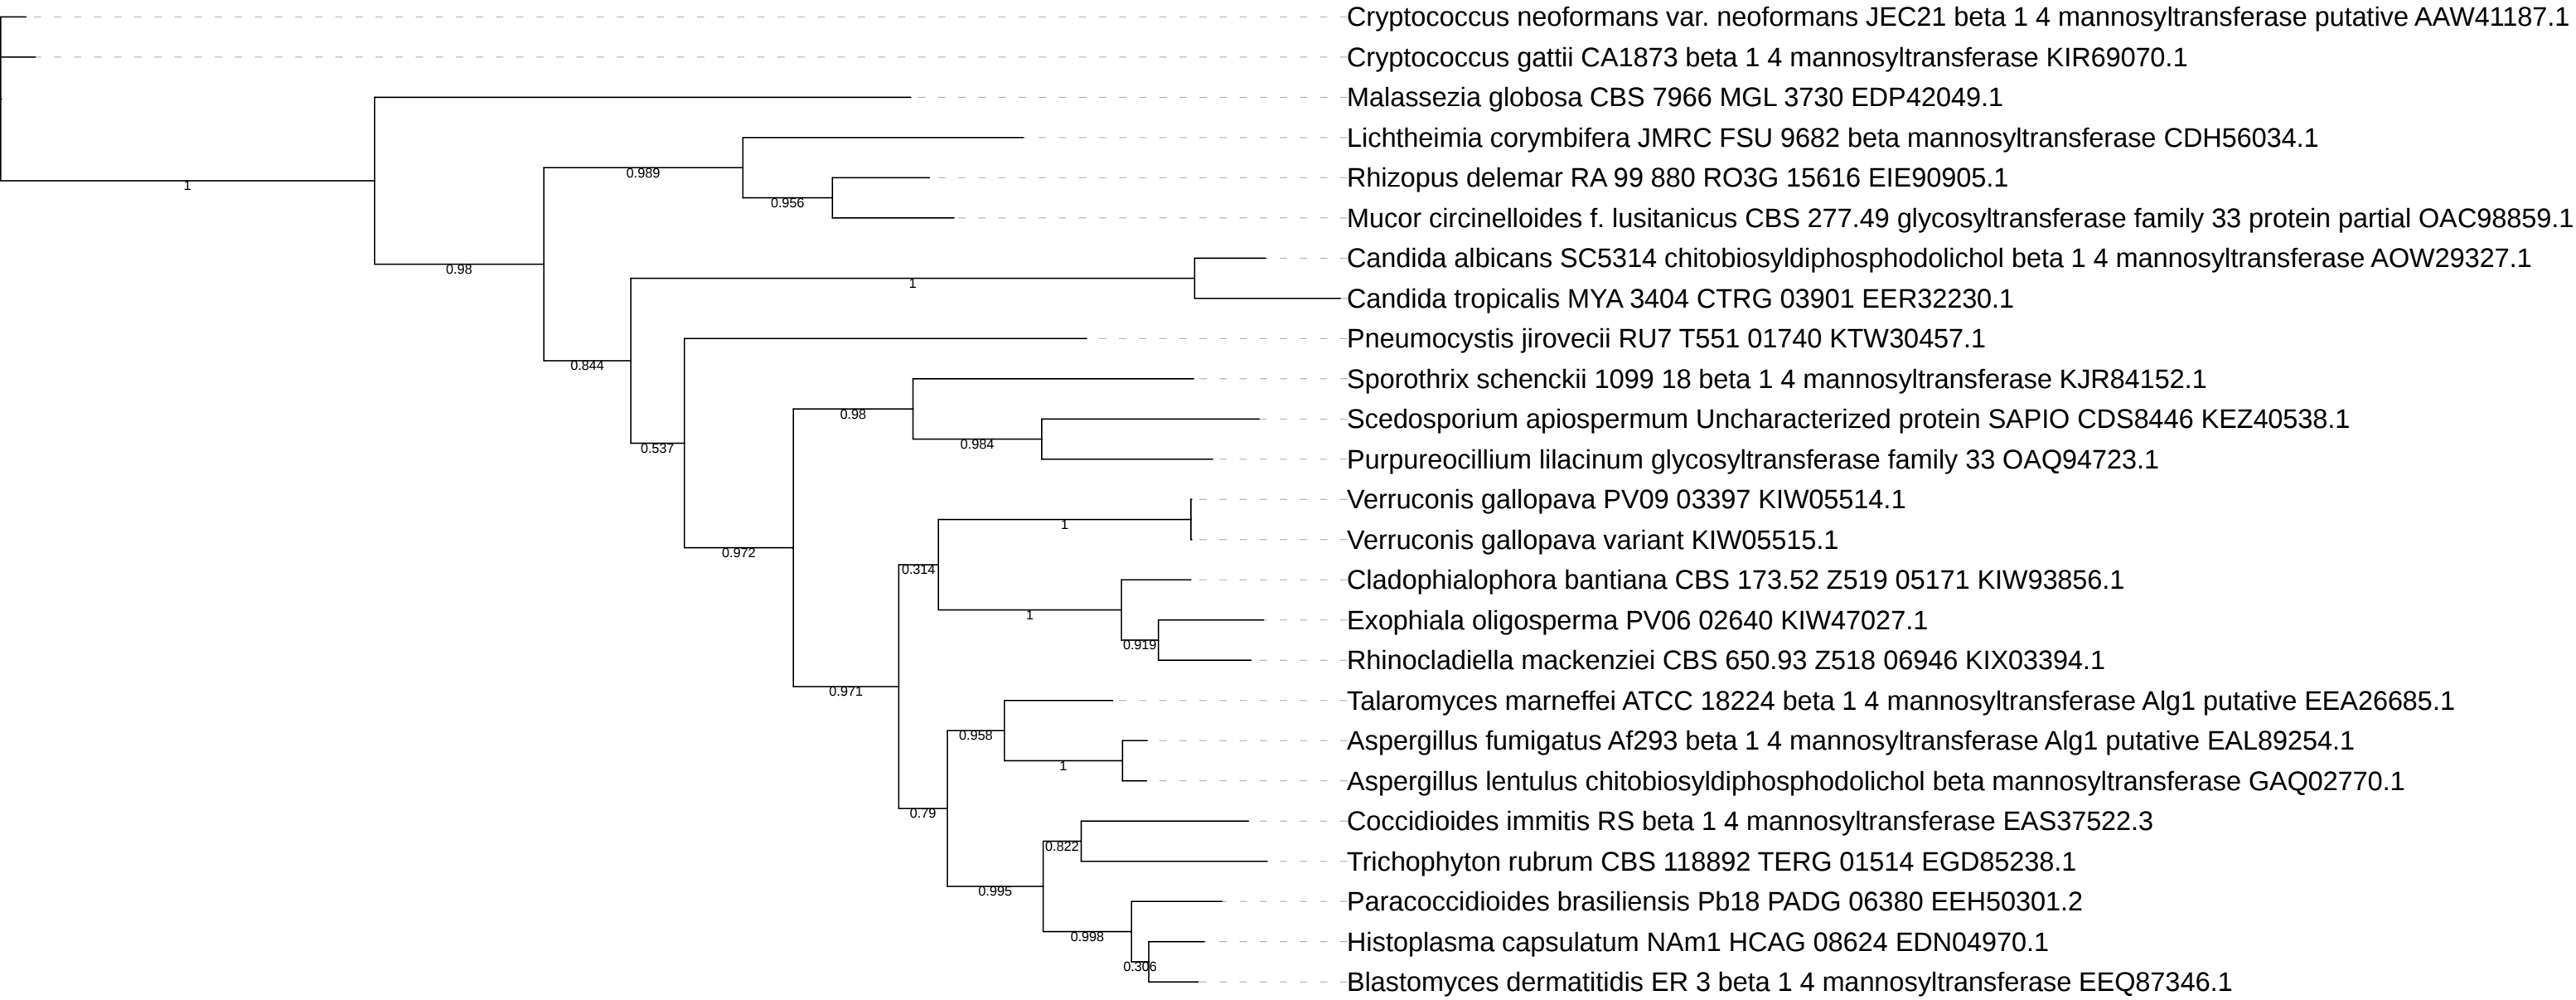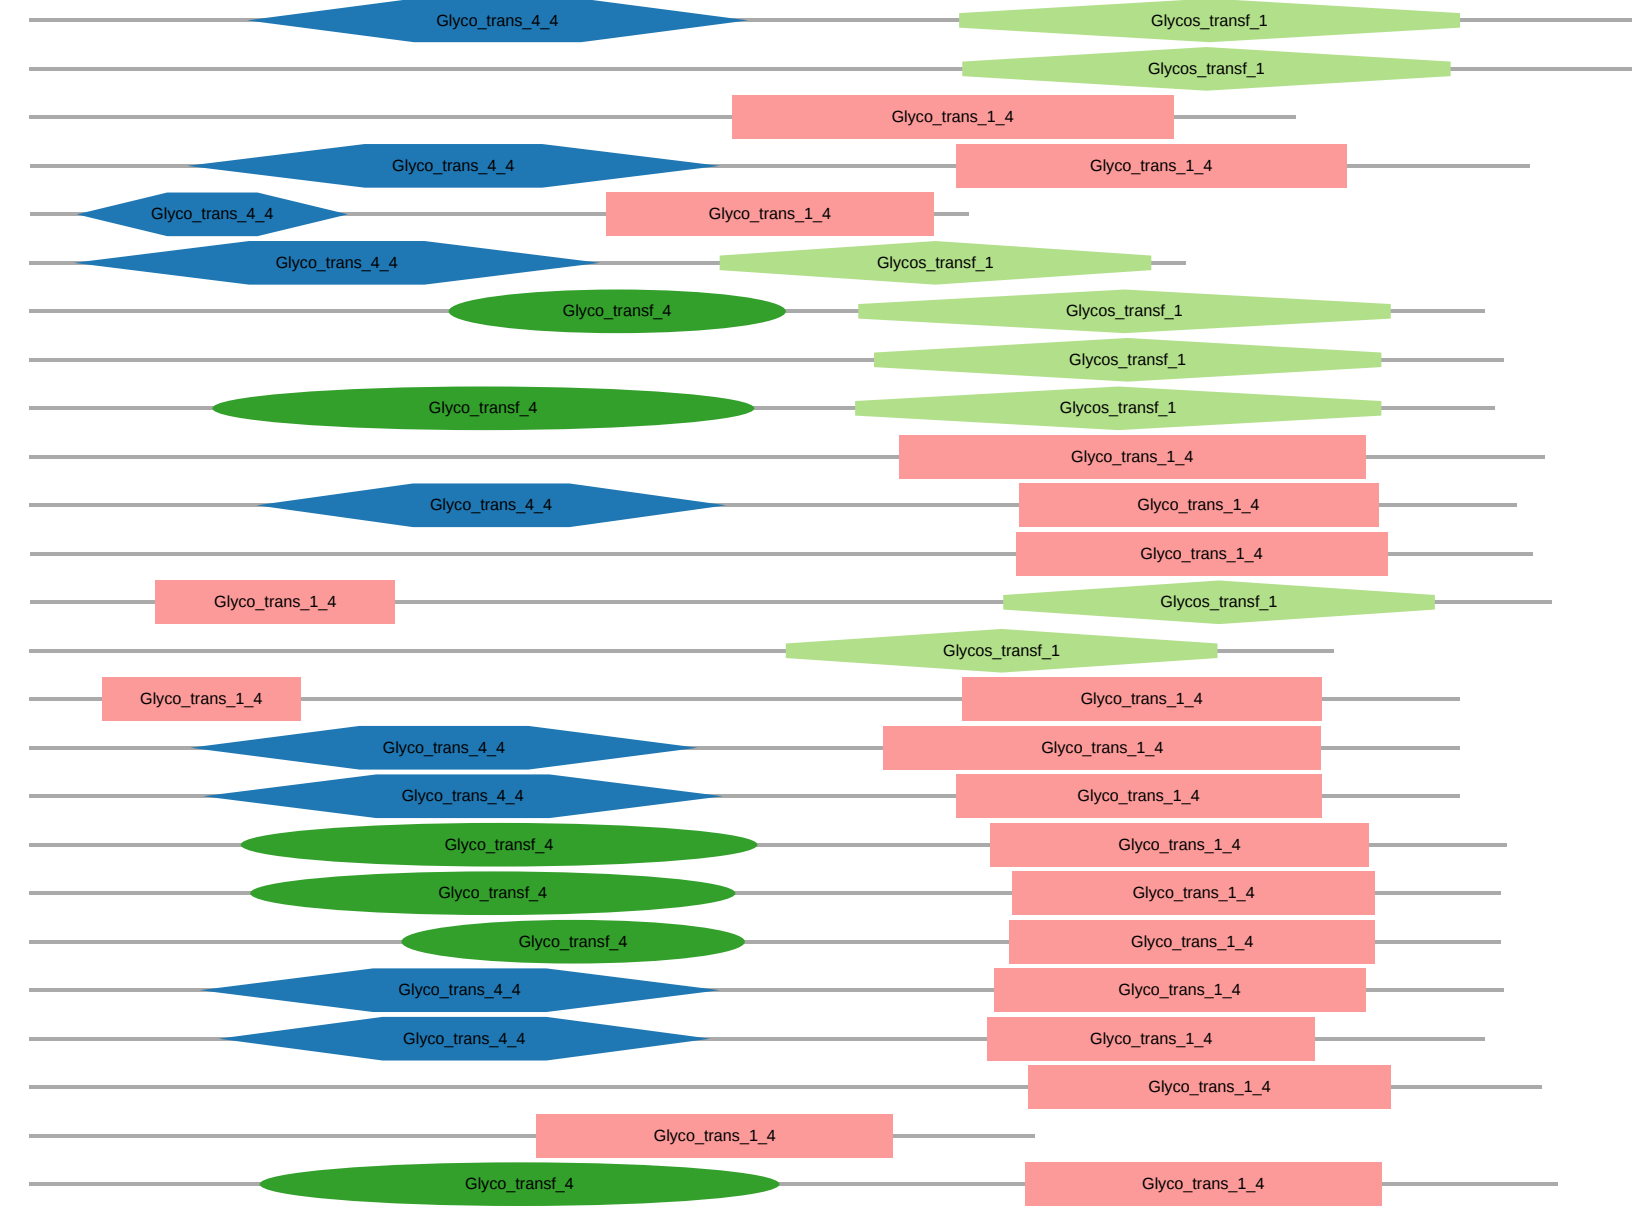

Supplement: s1 [file s1]

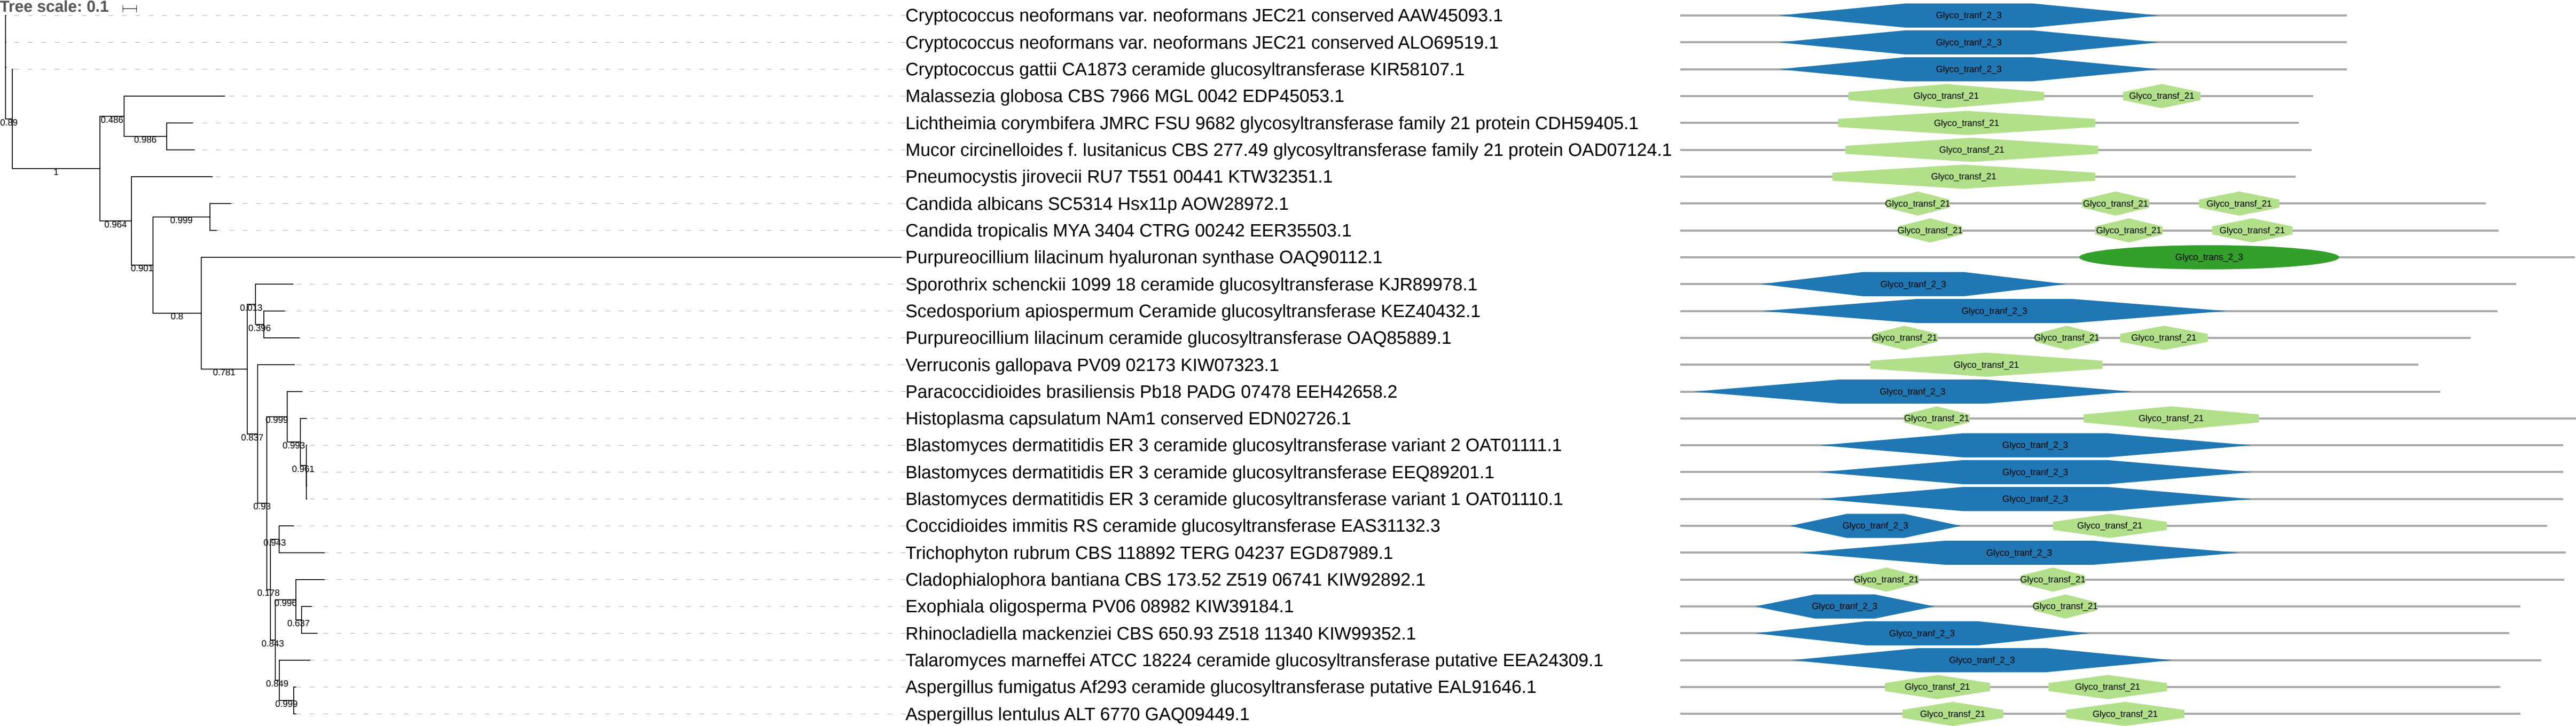

Supplement: s1 [file s1]

---

## Colored ranges

Gca1

ROT2

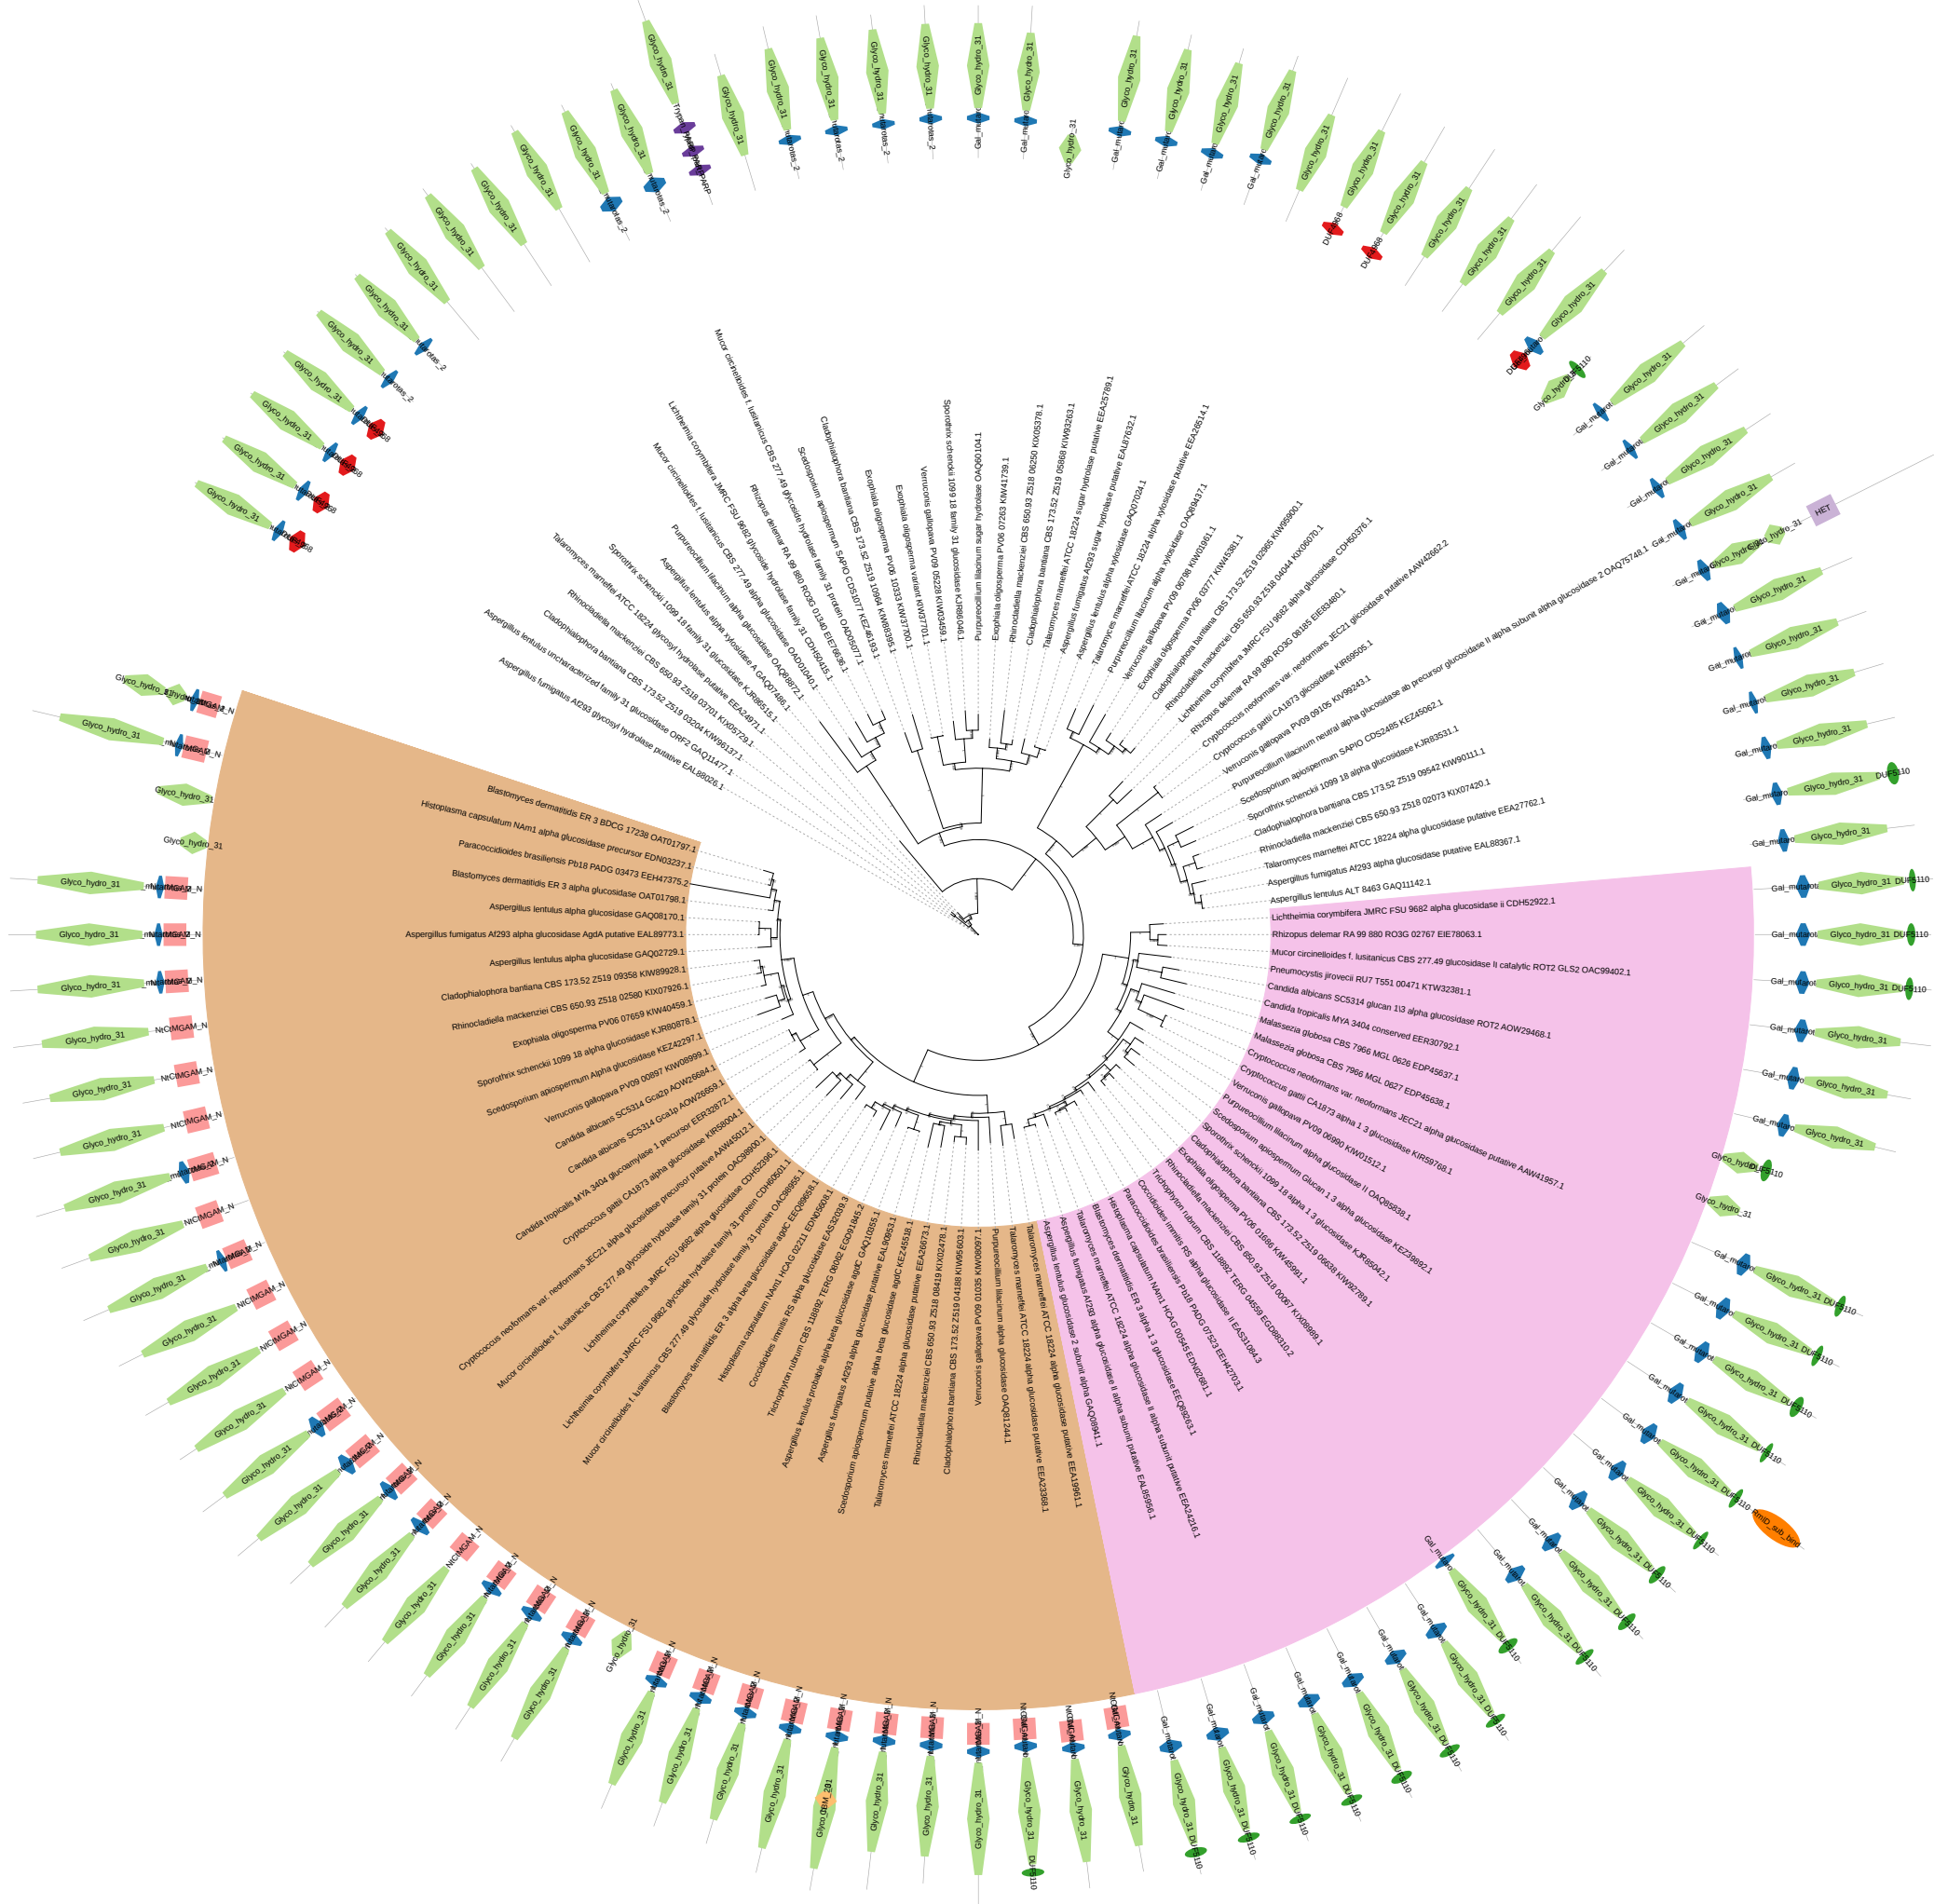

Supplement: s1 [file s1]

Tree scale: 0.1

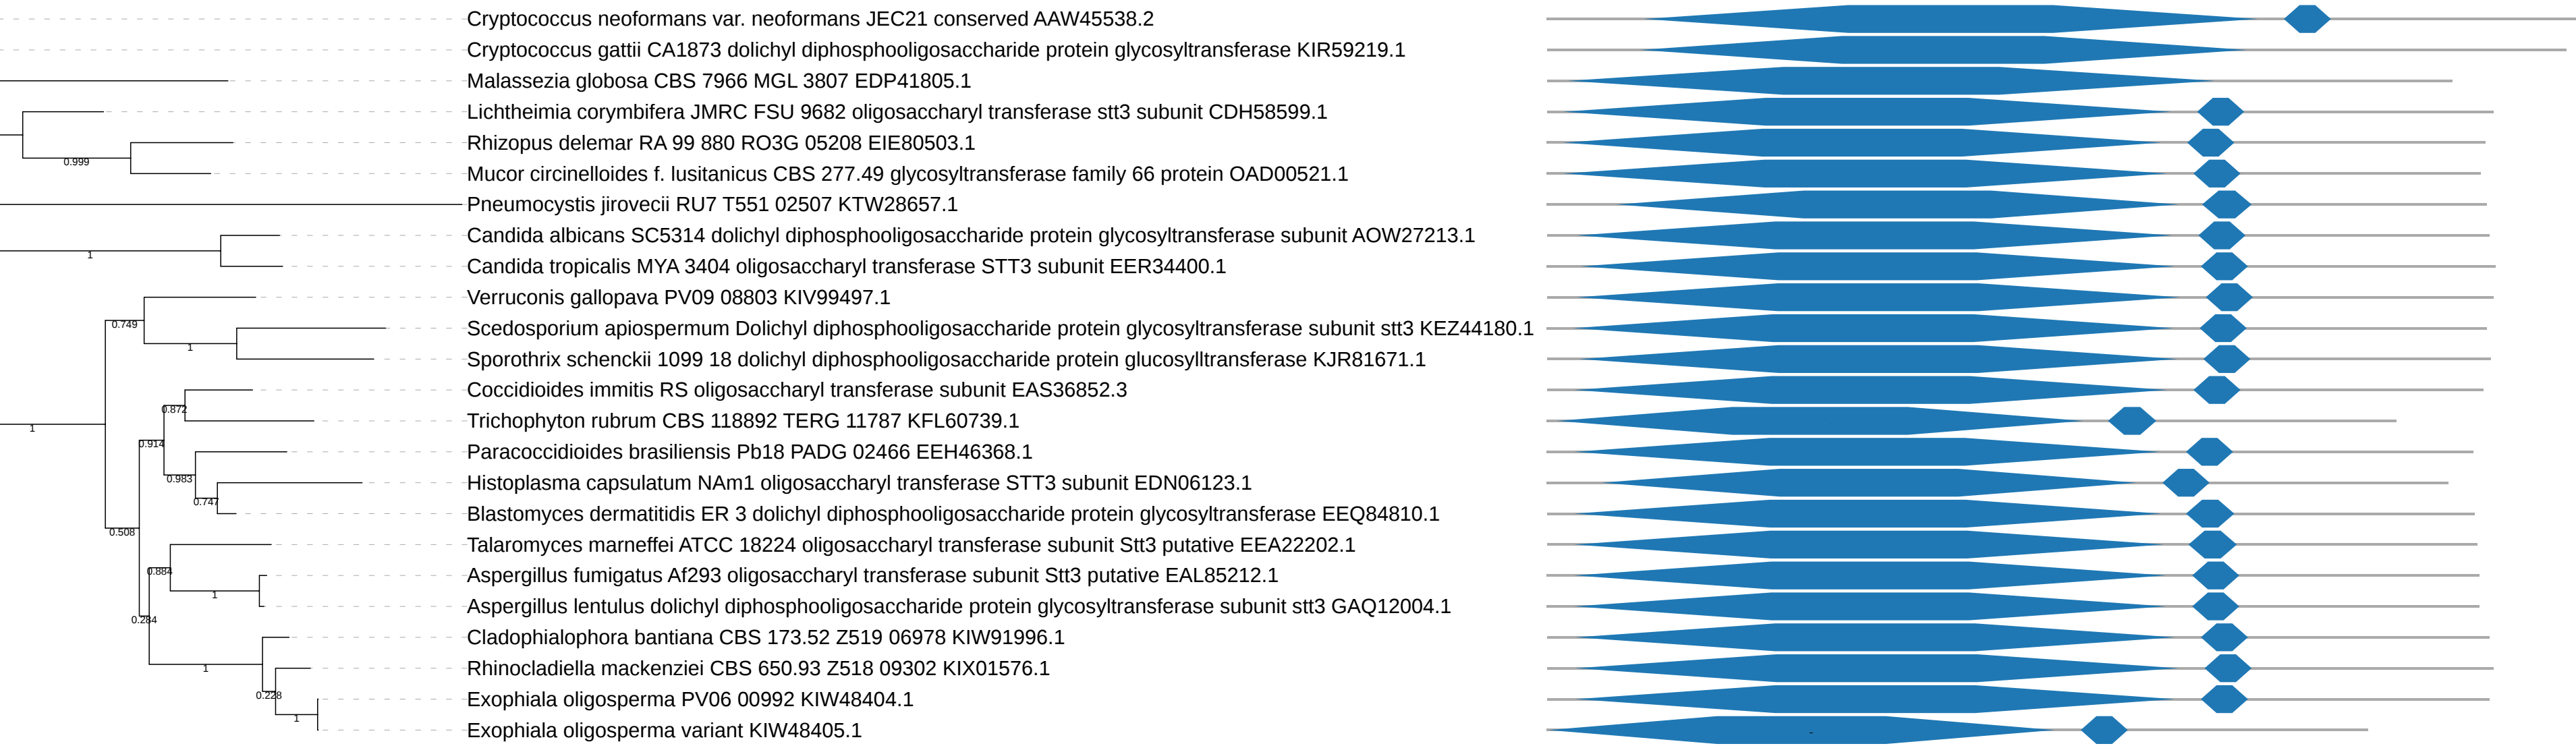

Supplement: s1 [file s1]

Tree scale: 1

Colored ranges

galactosyltransferase

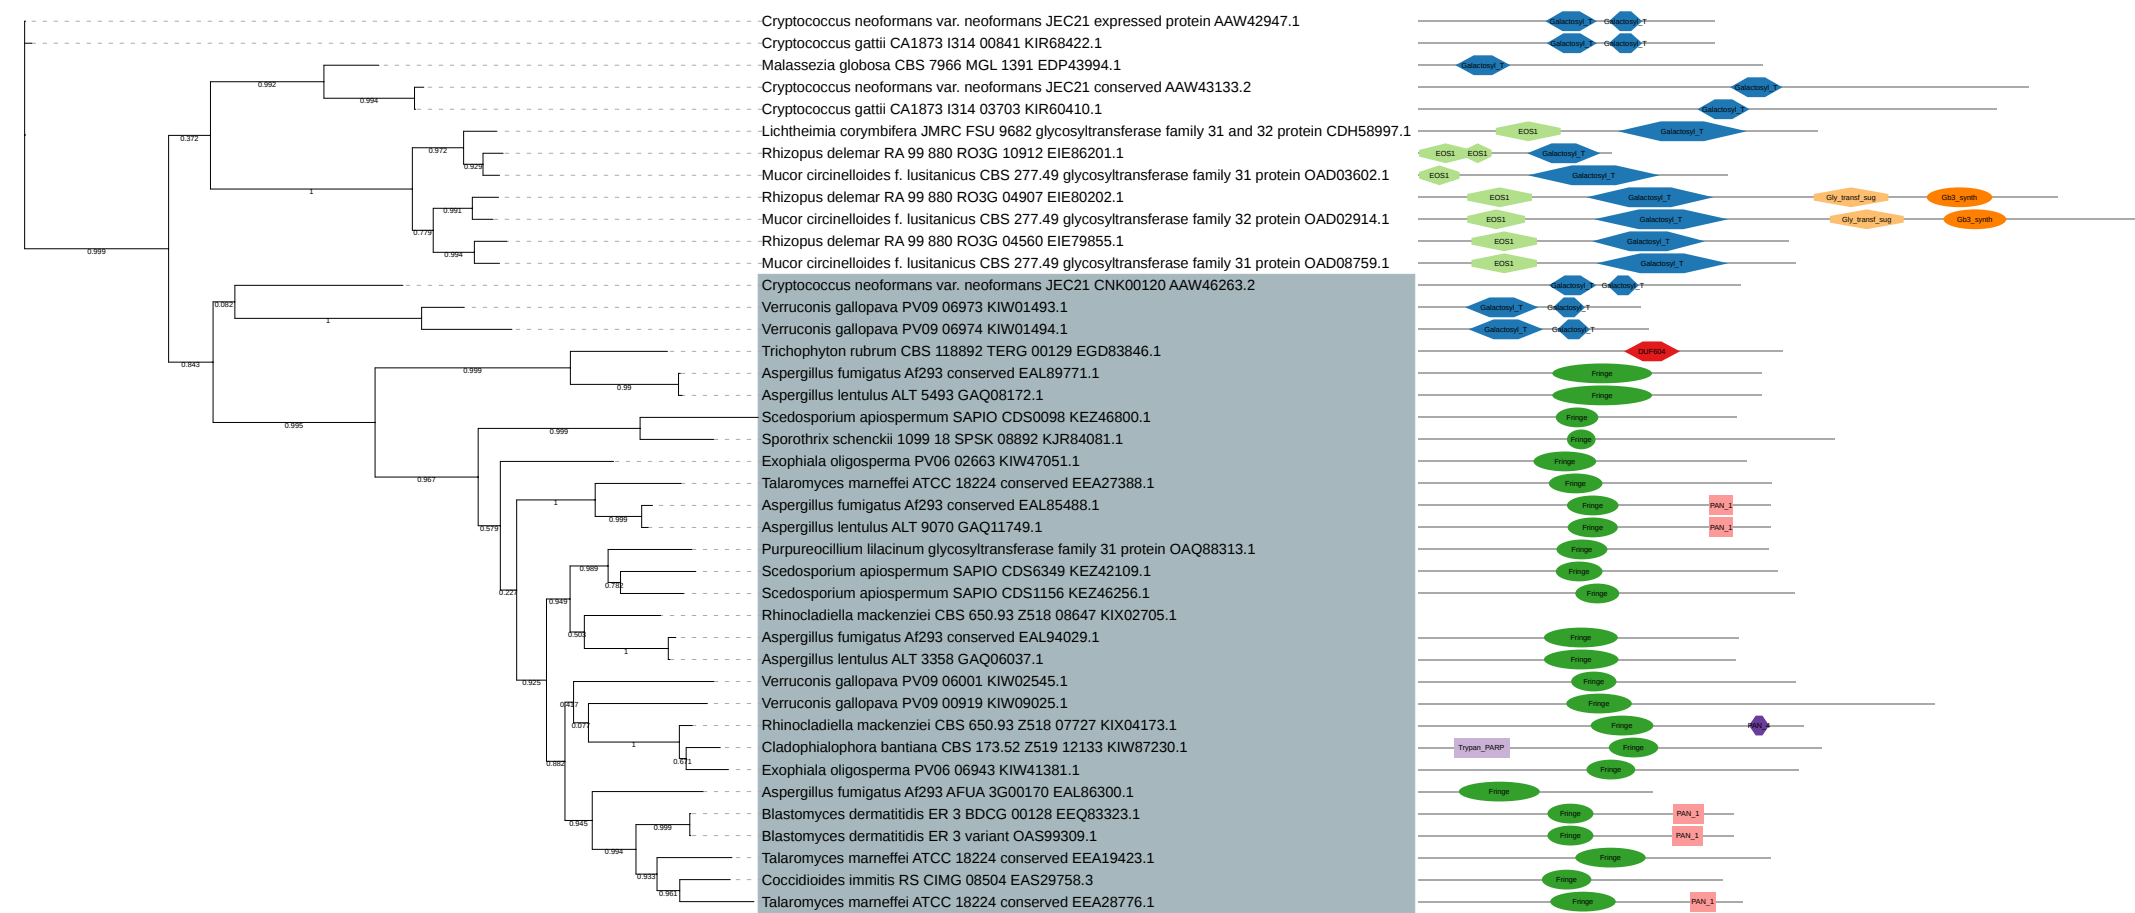

Supplement: s1 [file s1]

Tree scale: 1 

## Colored ranges

chitooligosaccharide oxidase

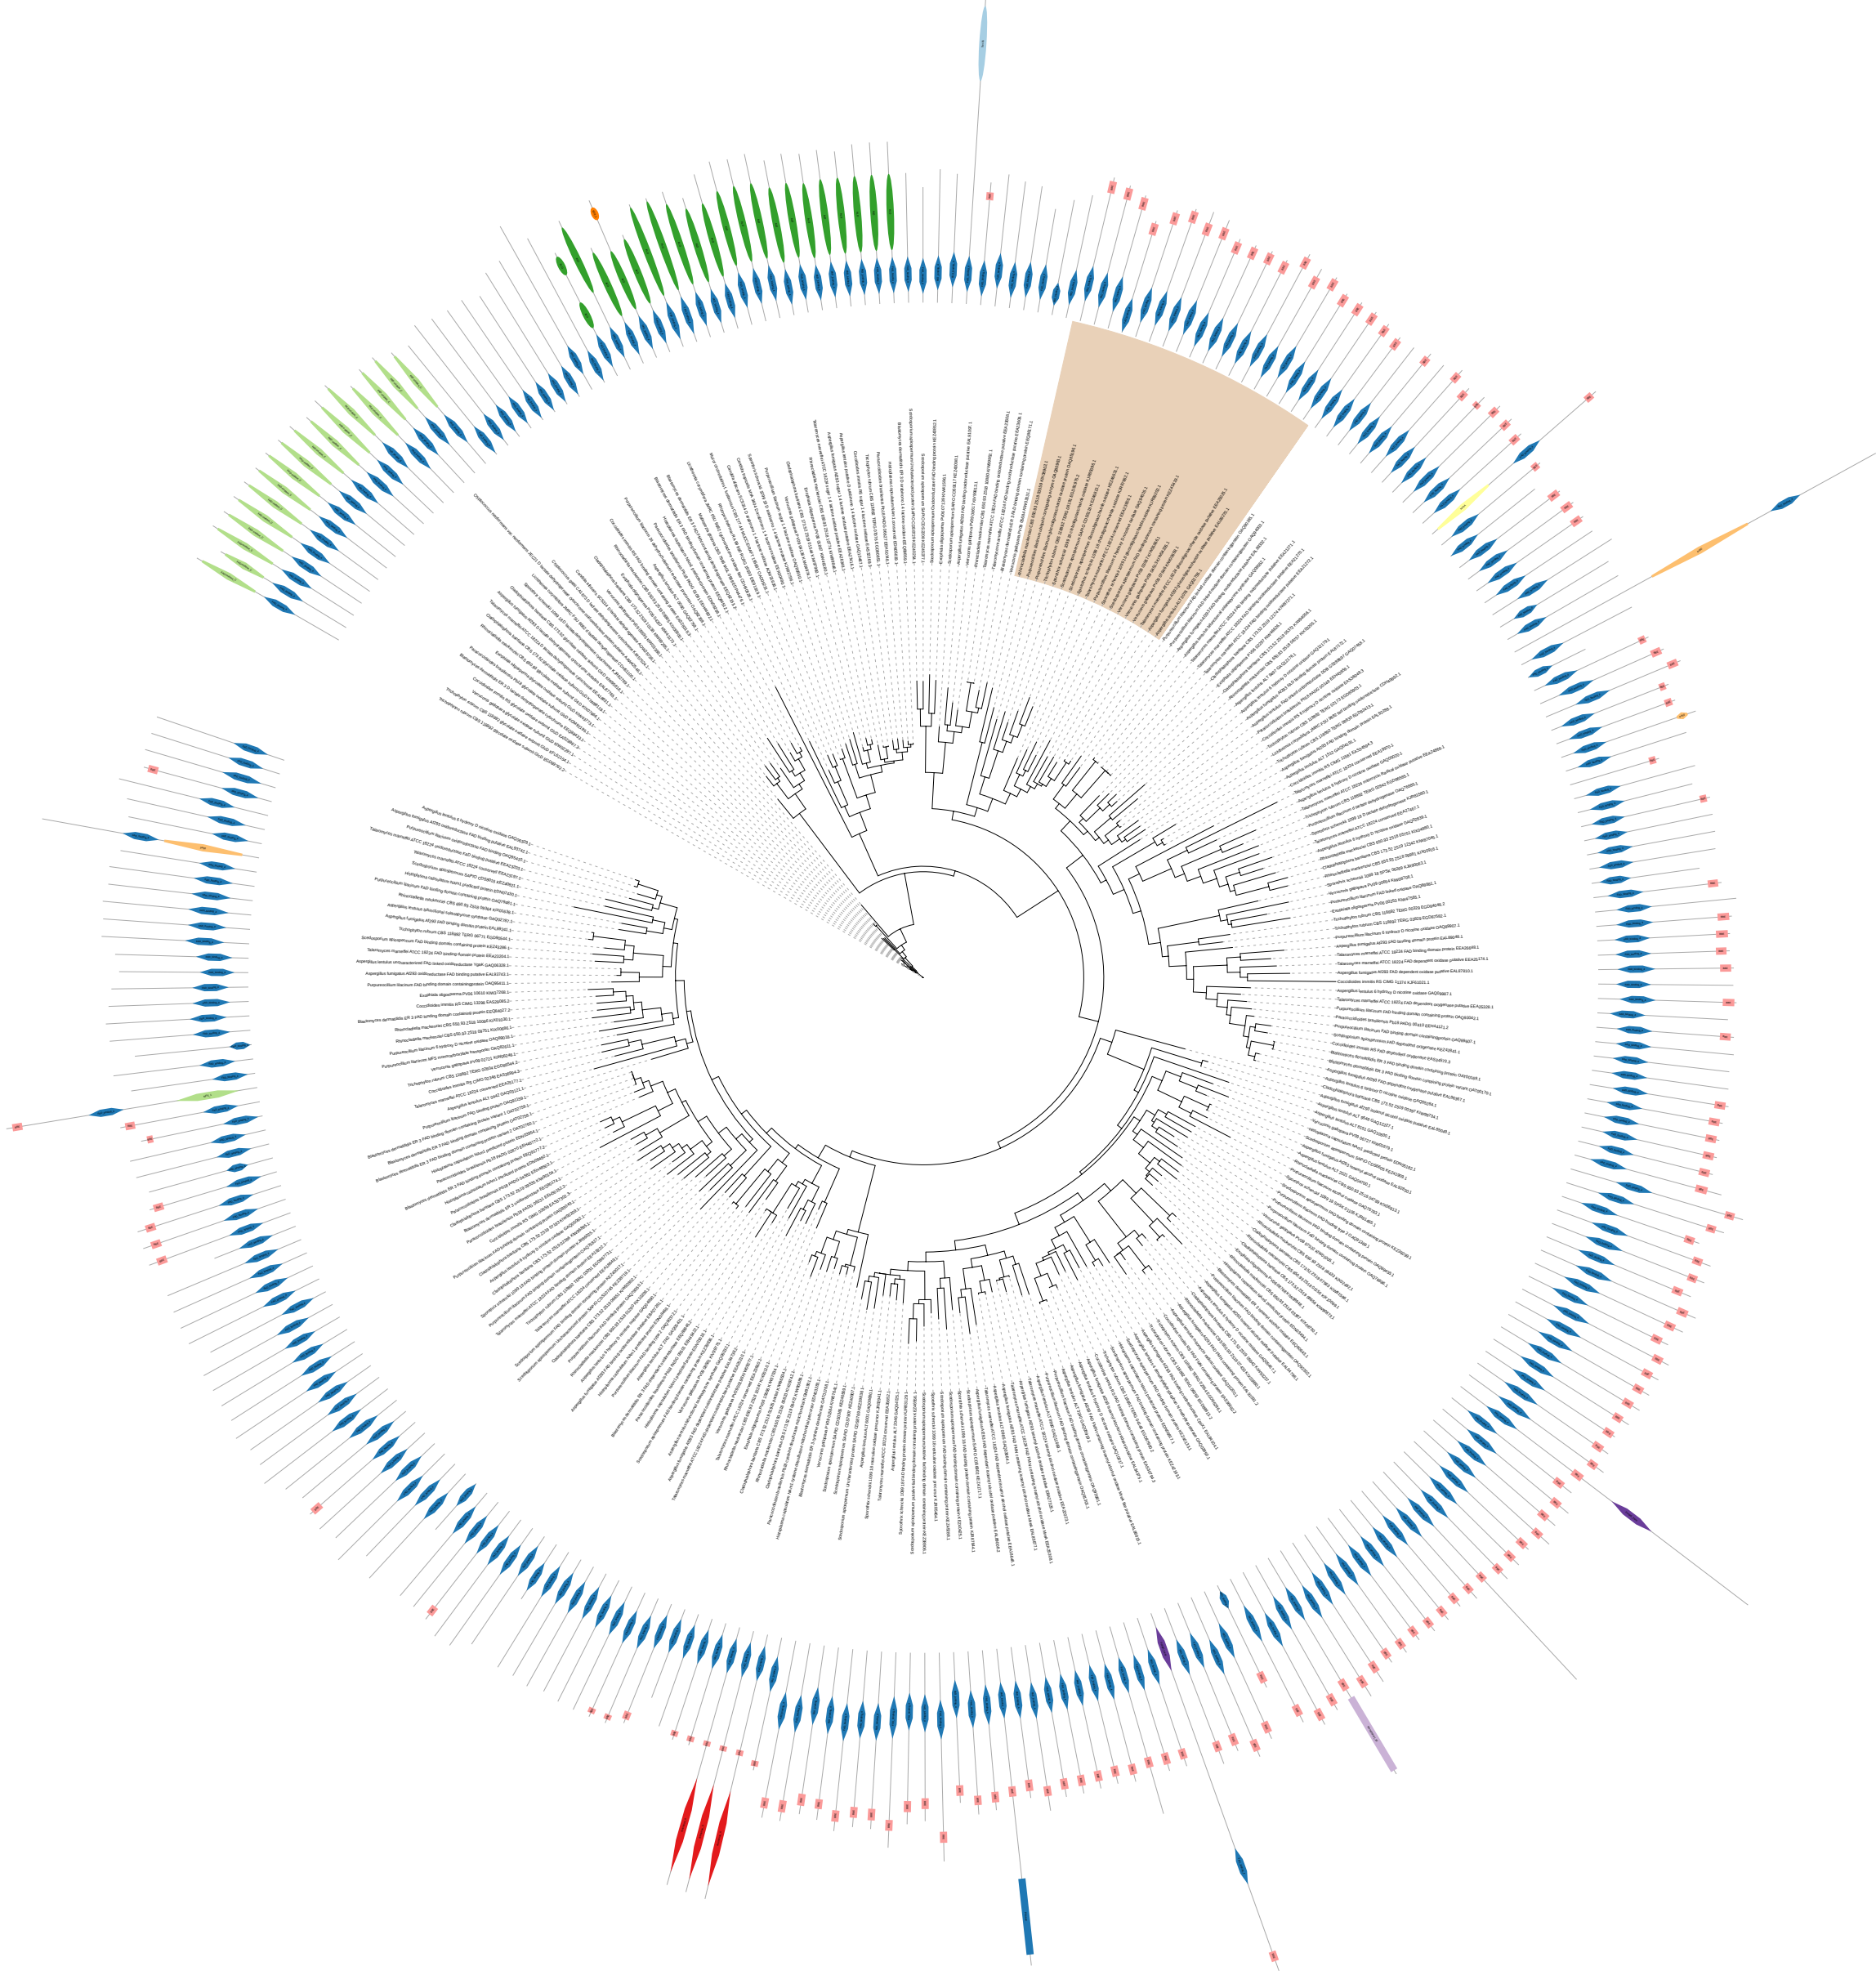

Supplement: s1 [file s1]

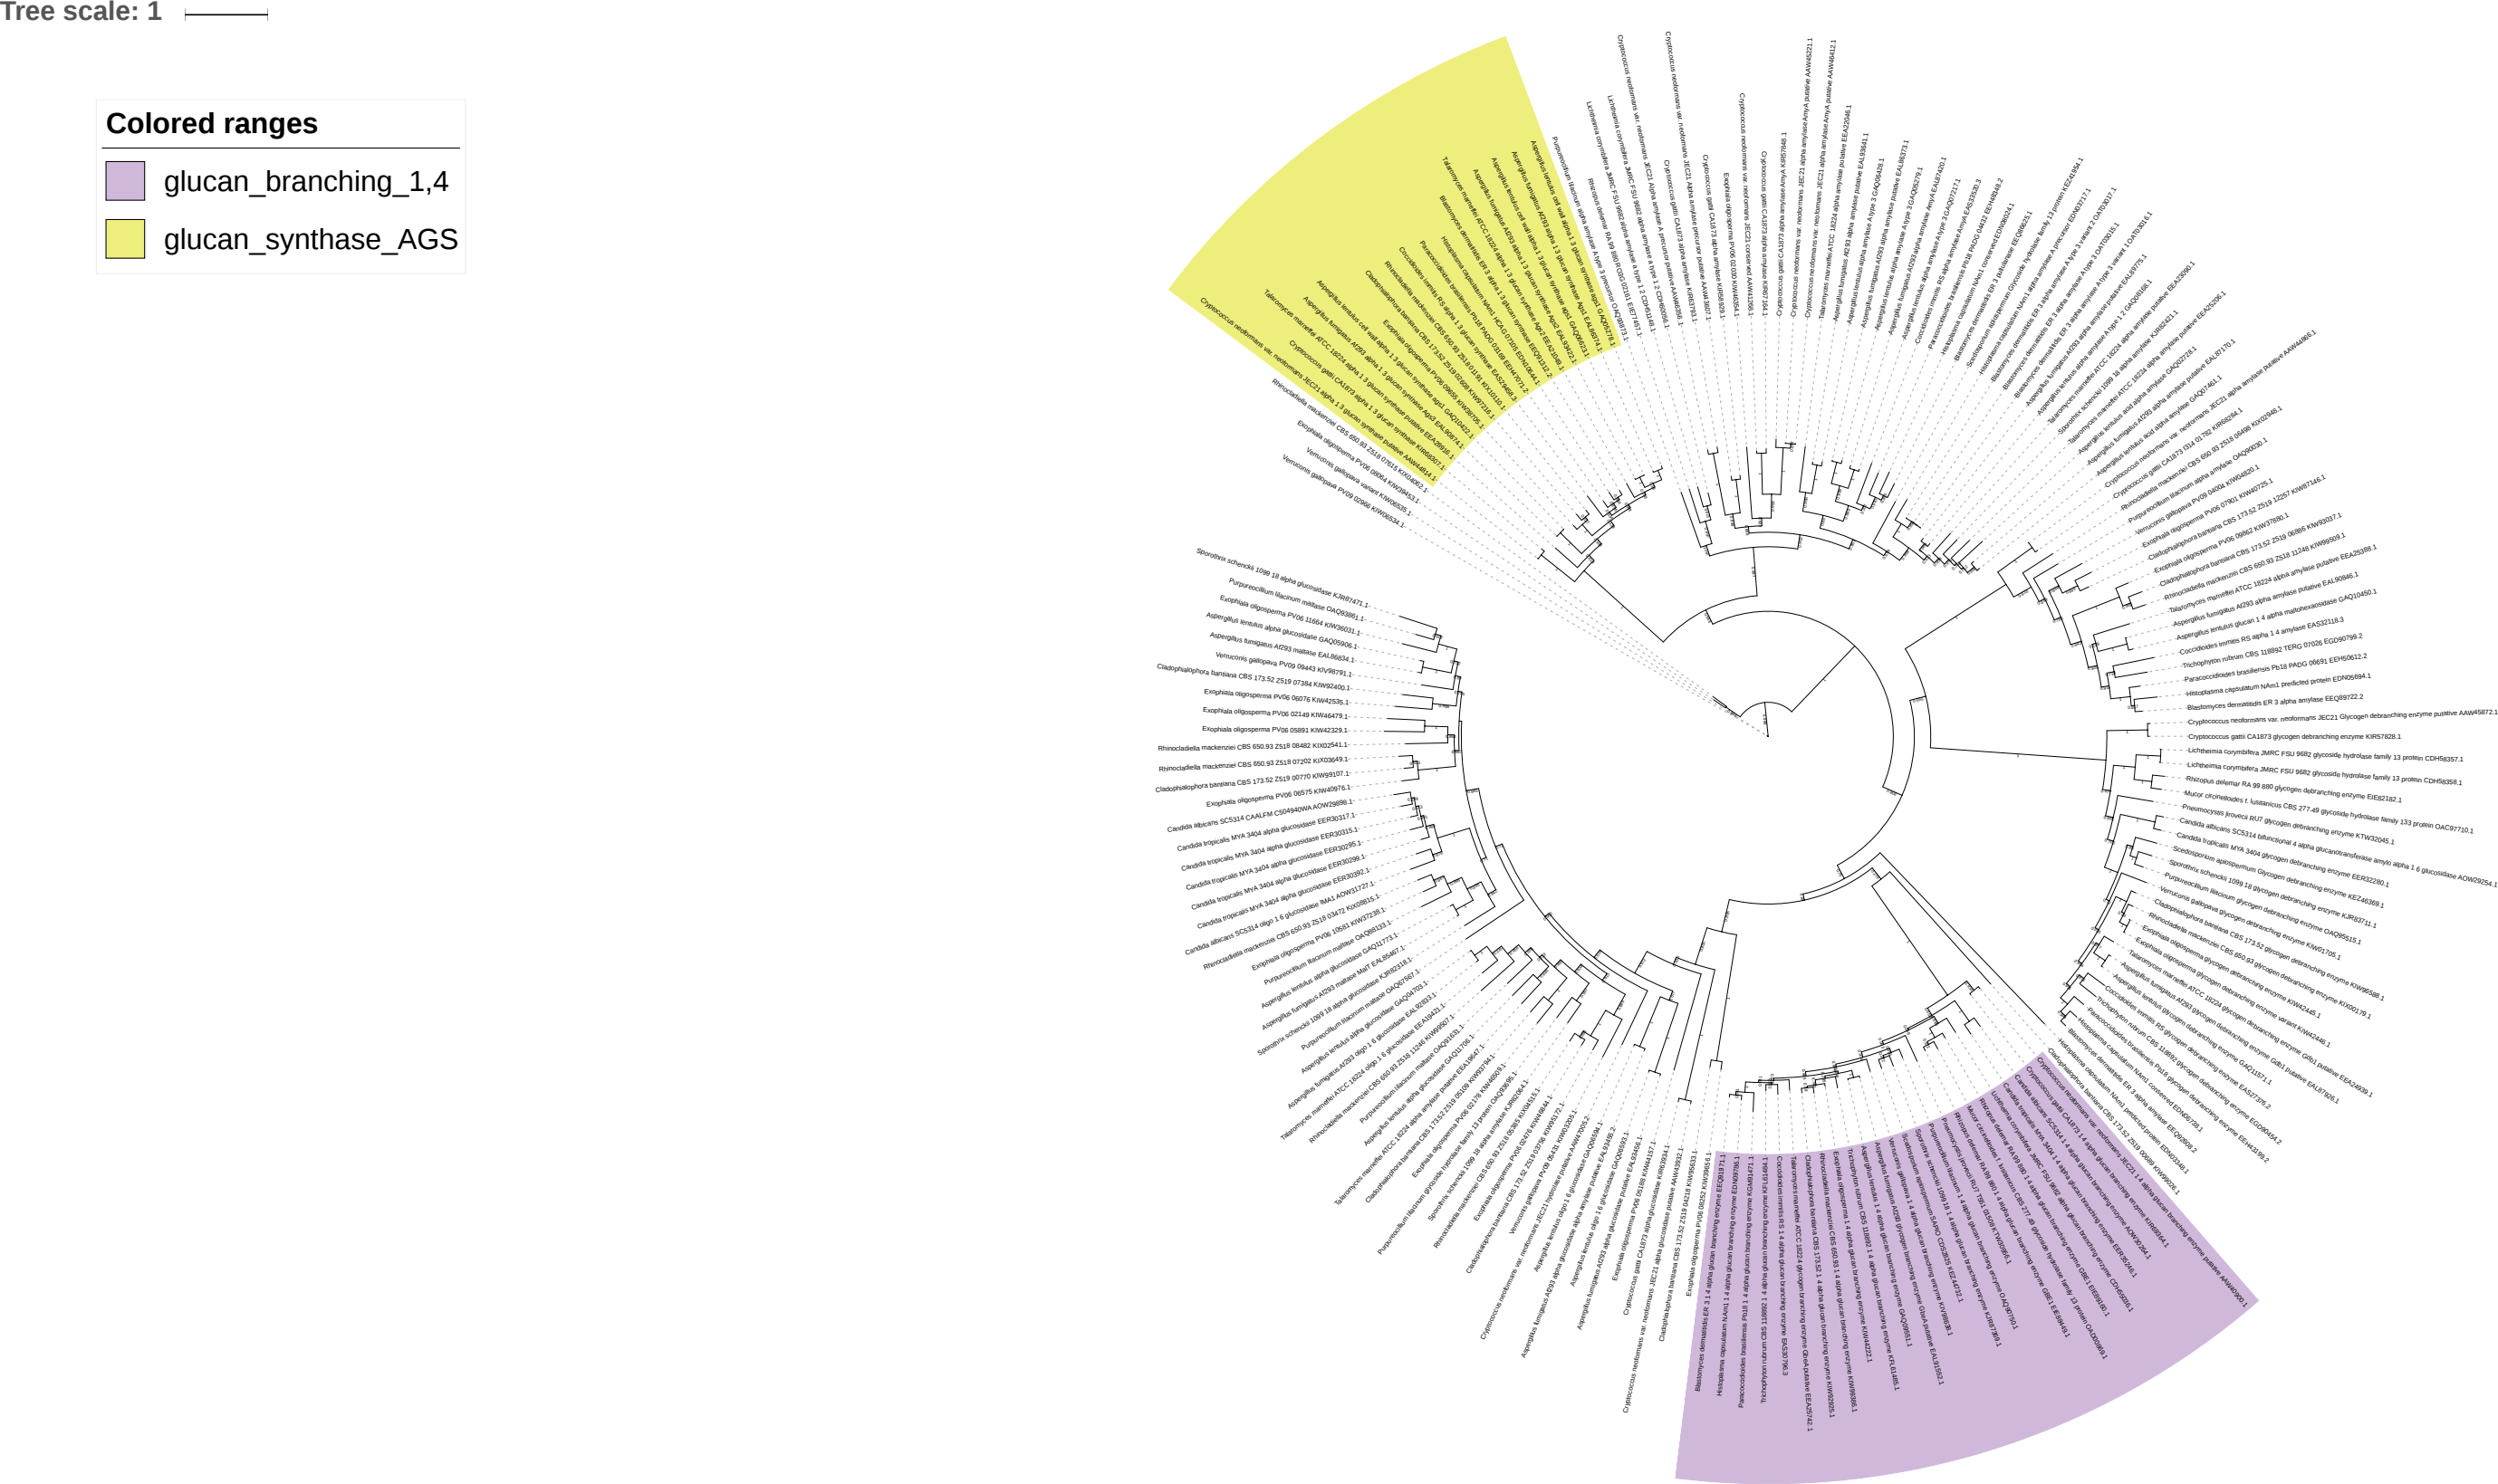

Supplement: s1 [file s1]

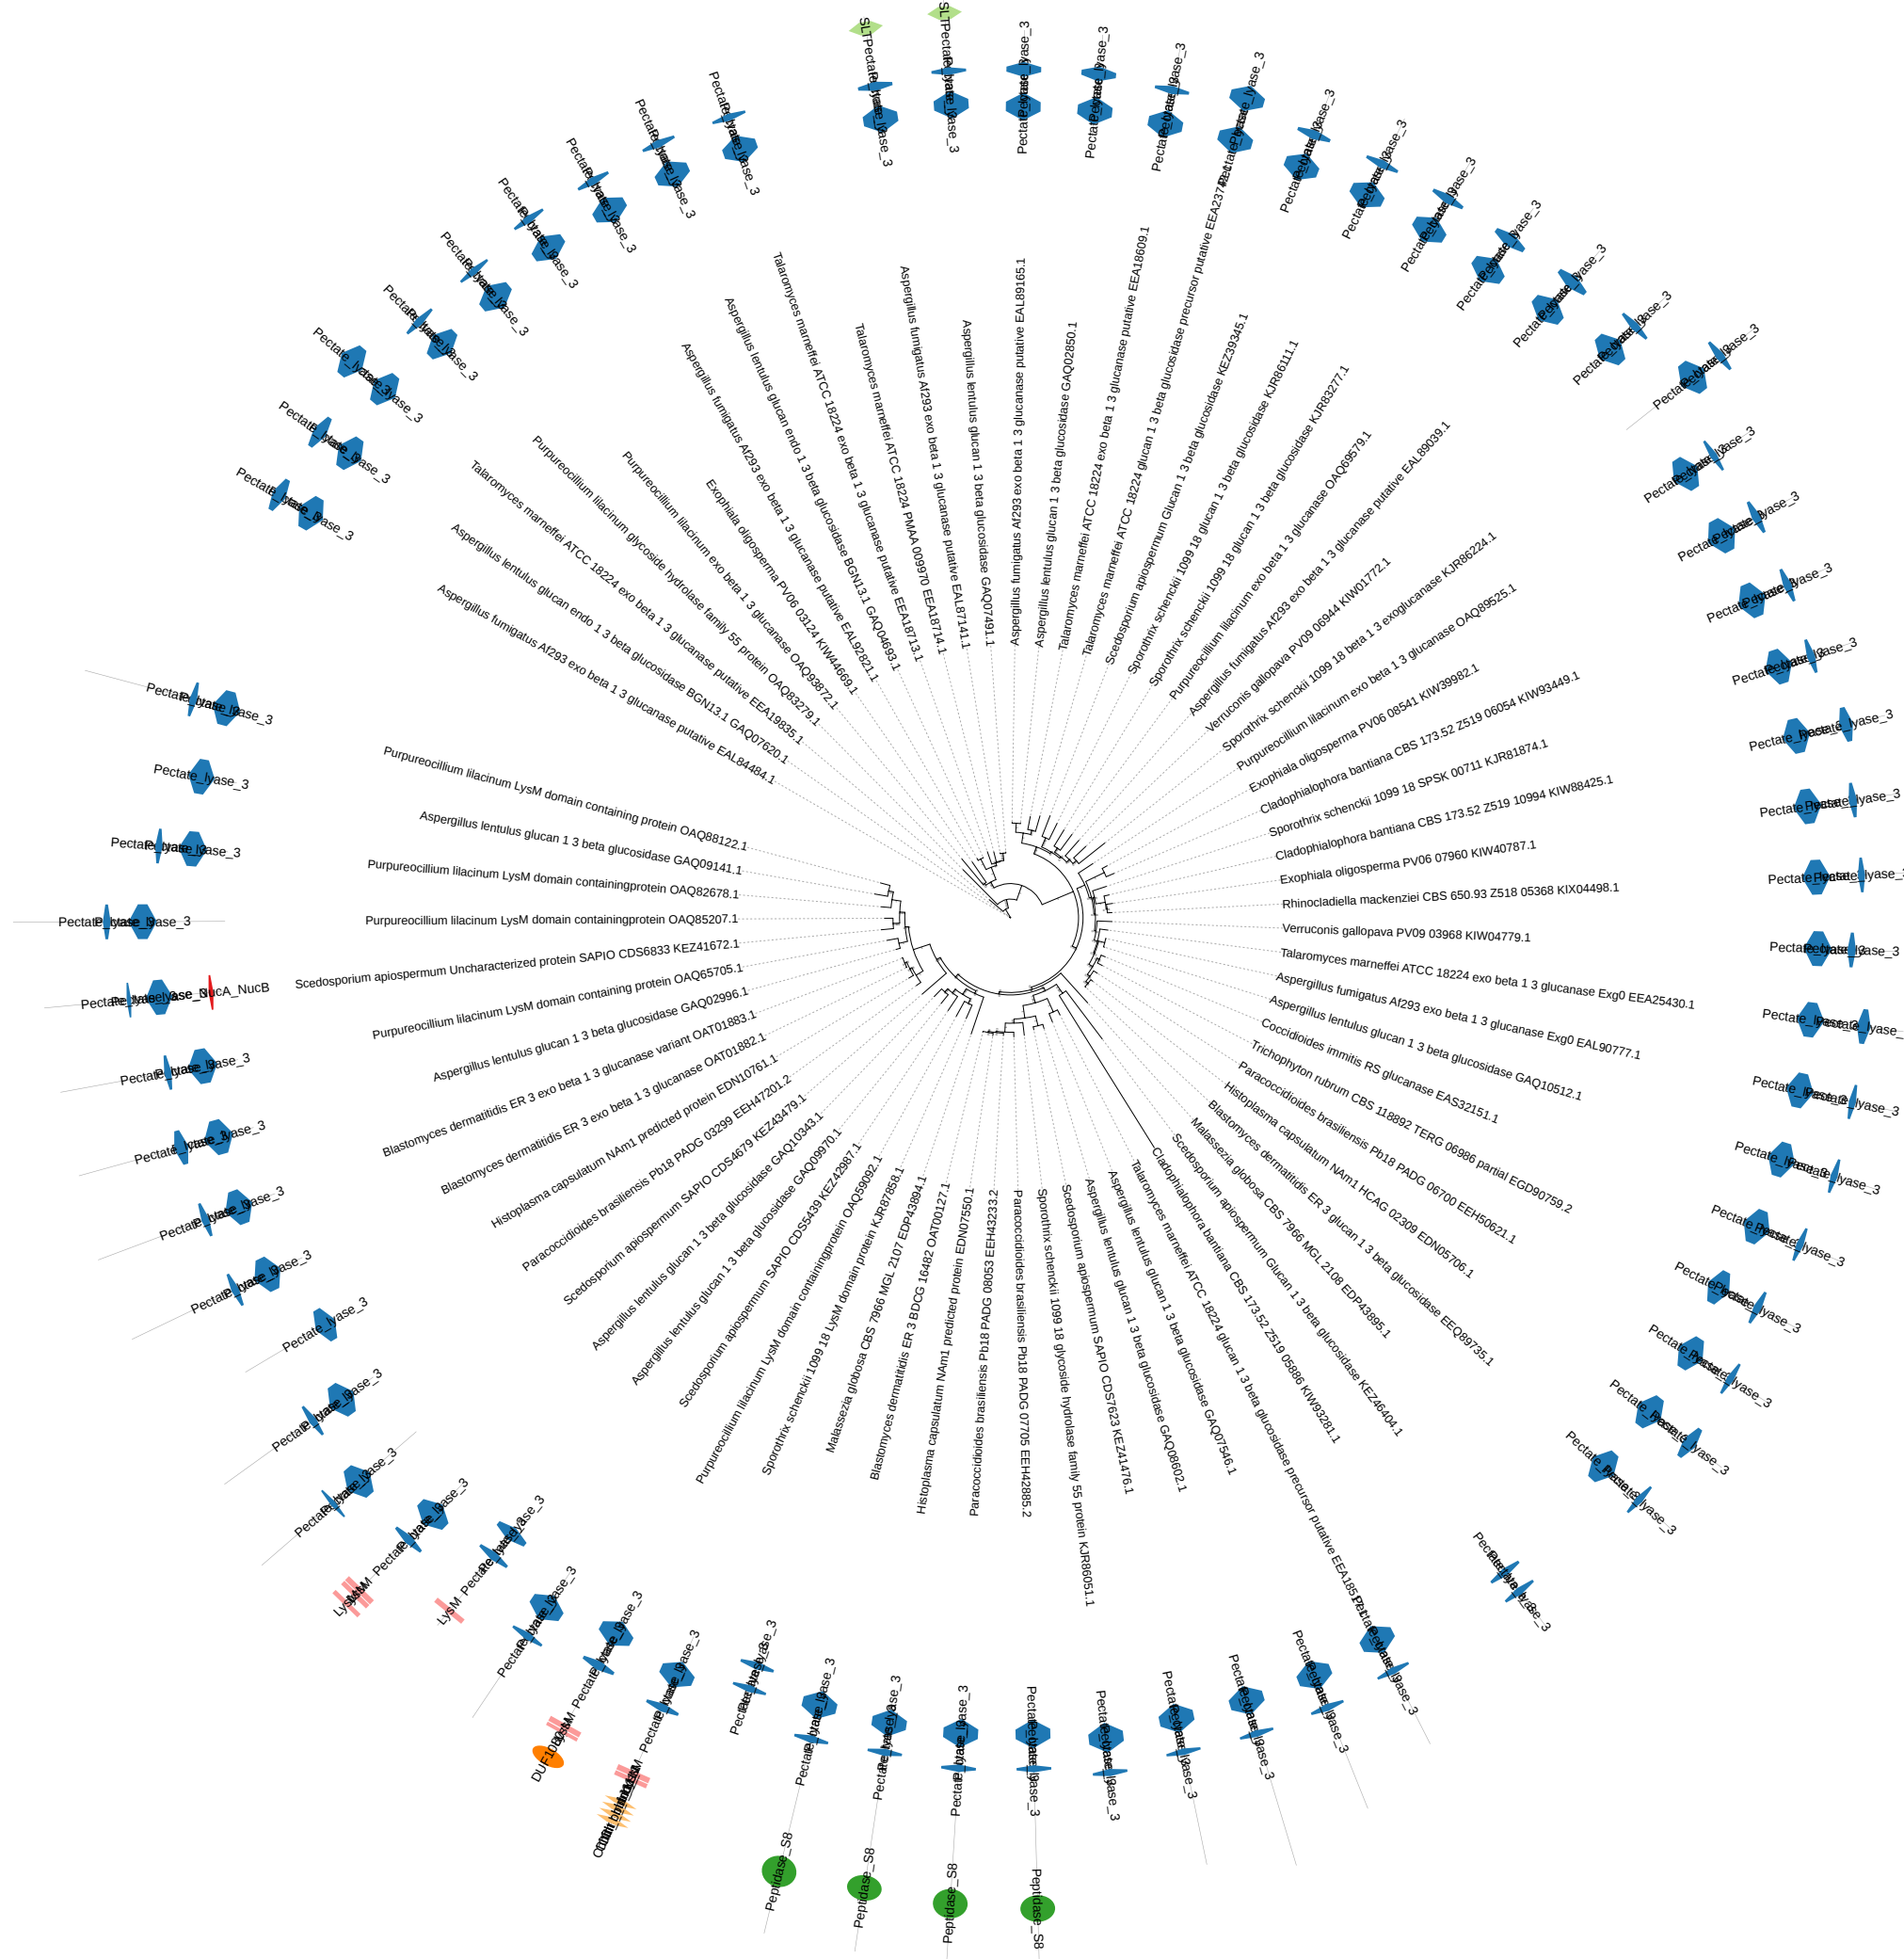

Supplement: s1 [file s1]

## Colored ranges

capsule biosynthesis

 1,6manno

SurA

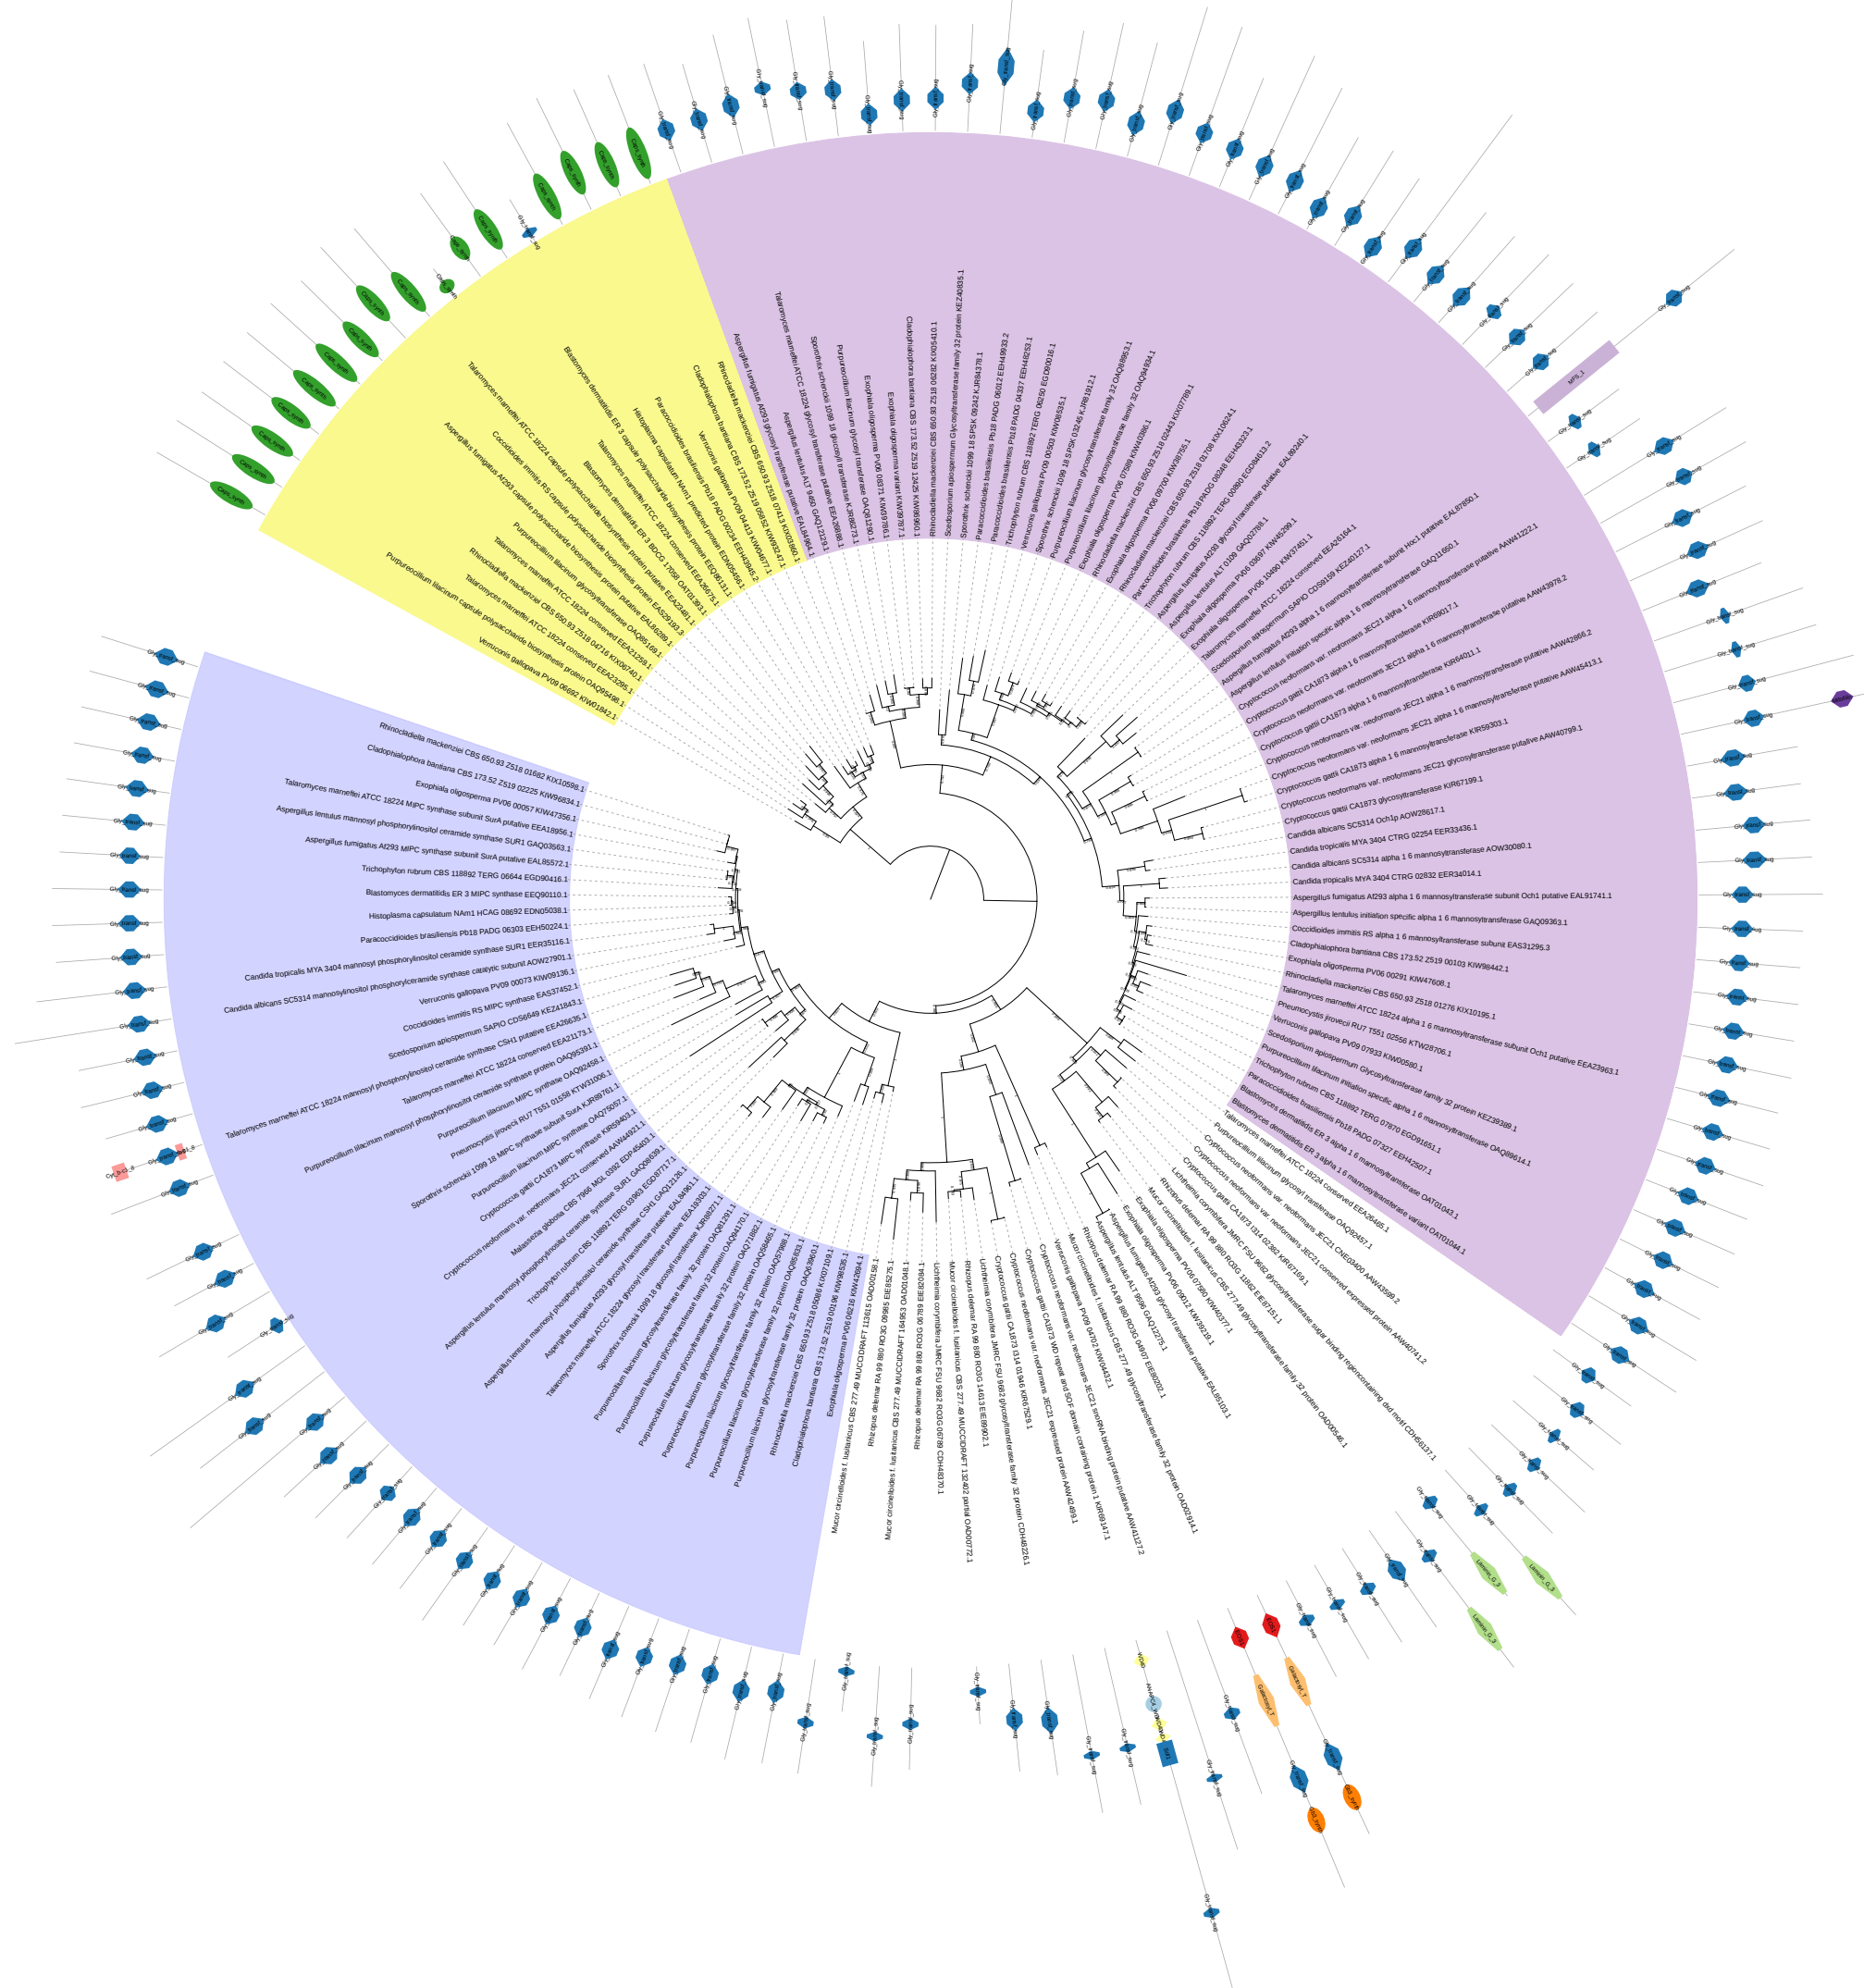

Supplement: s1 [file s1]

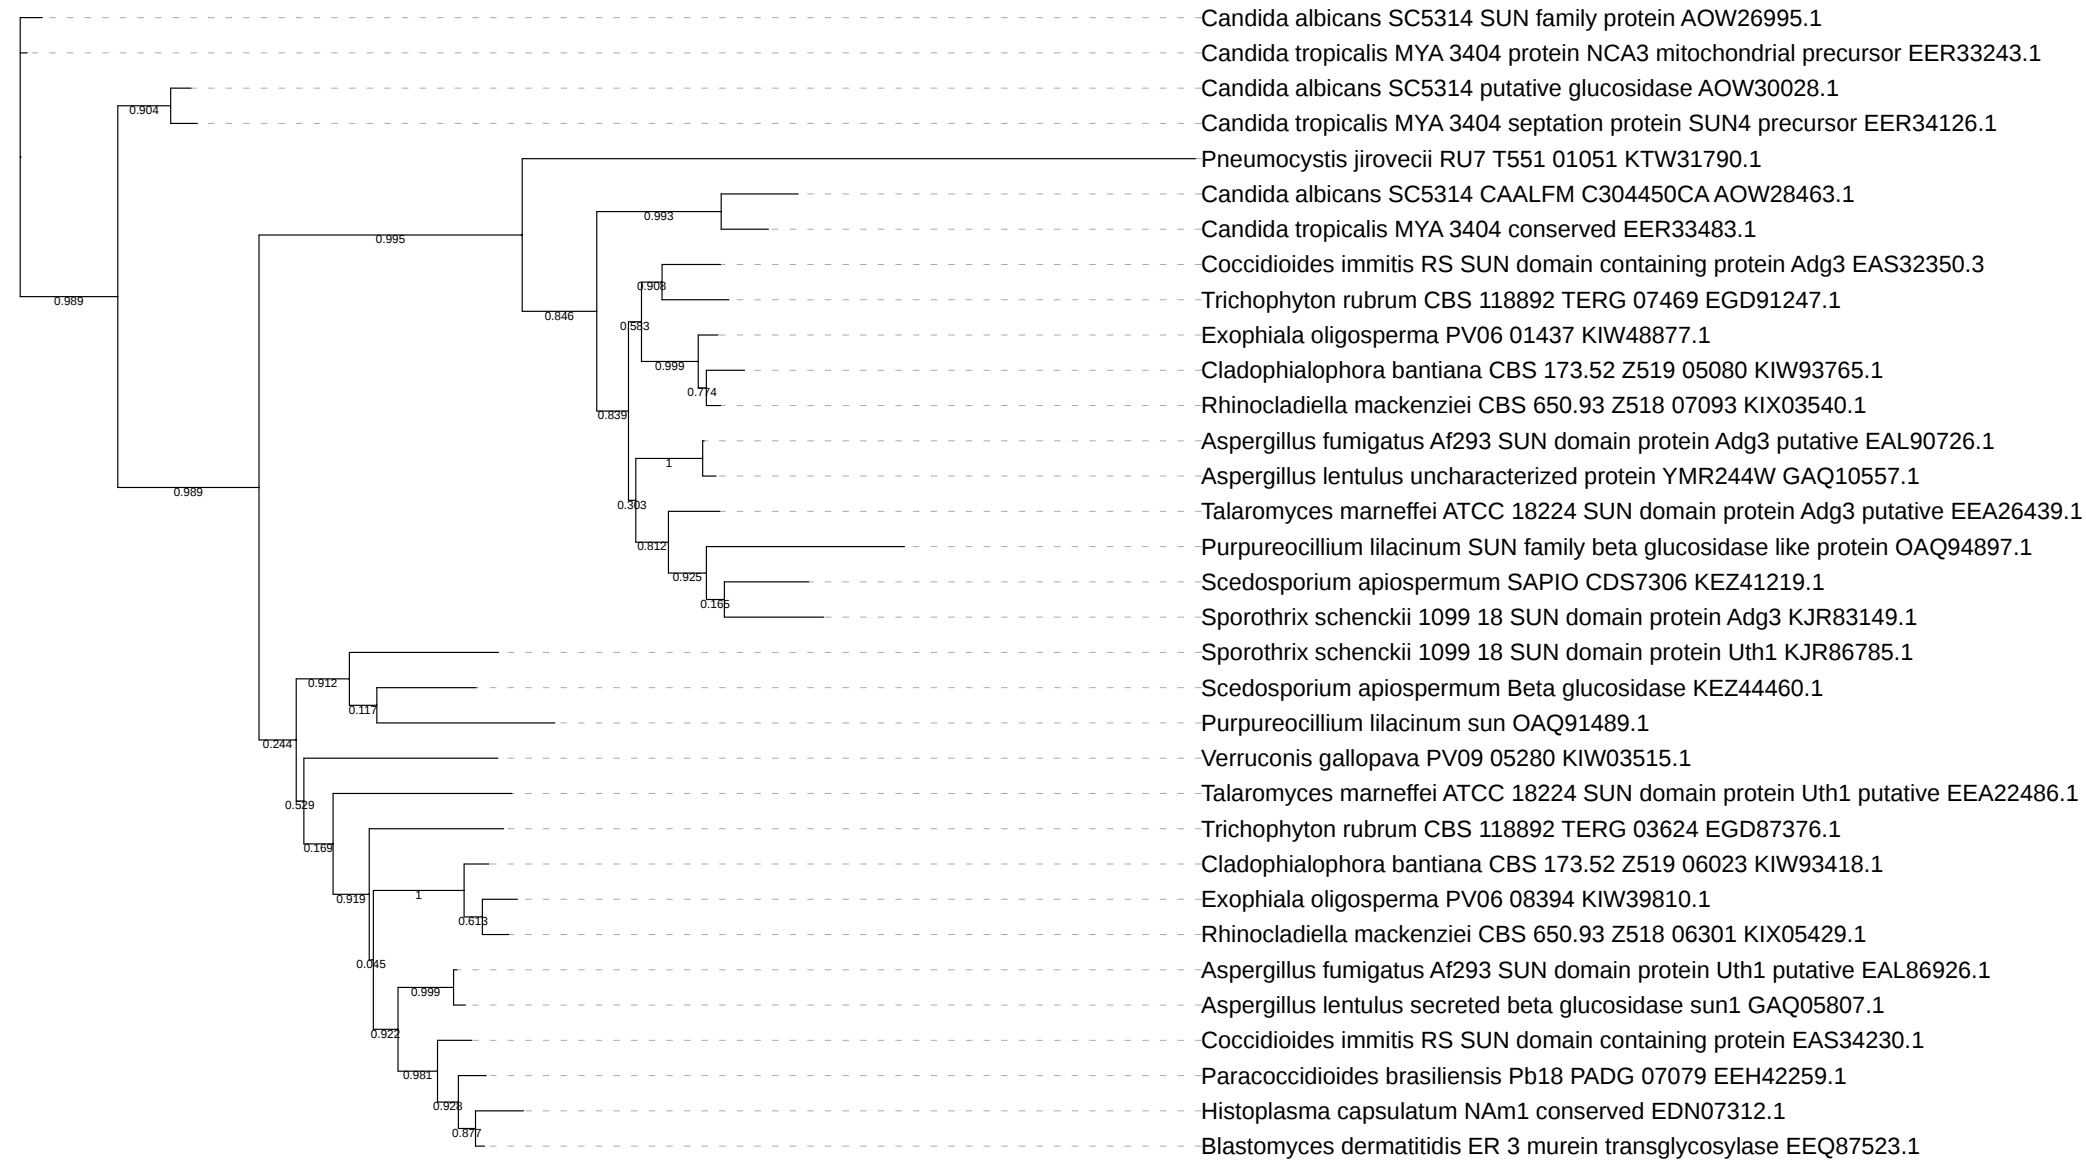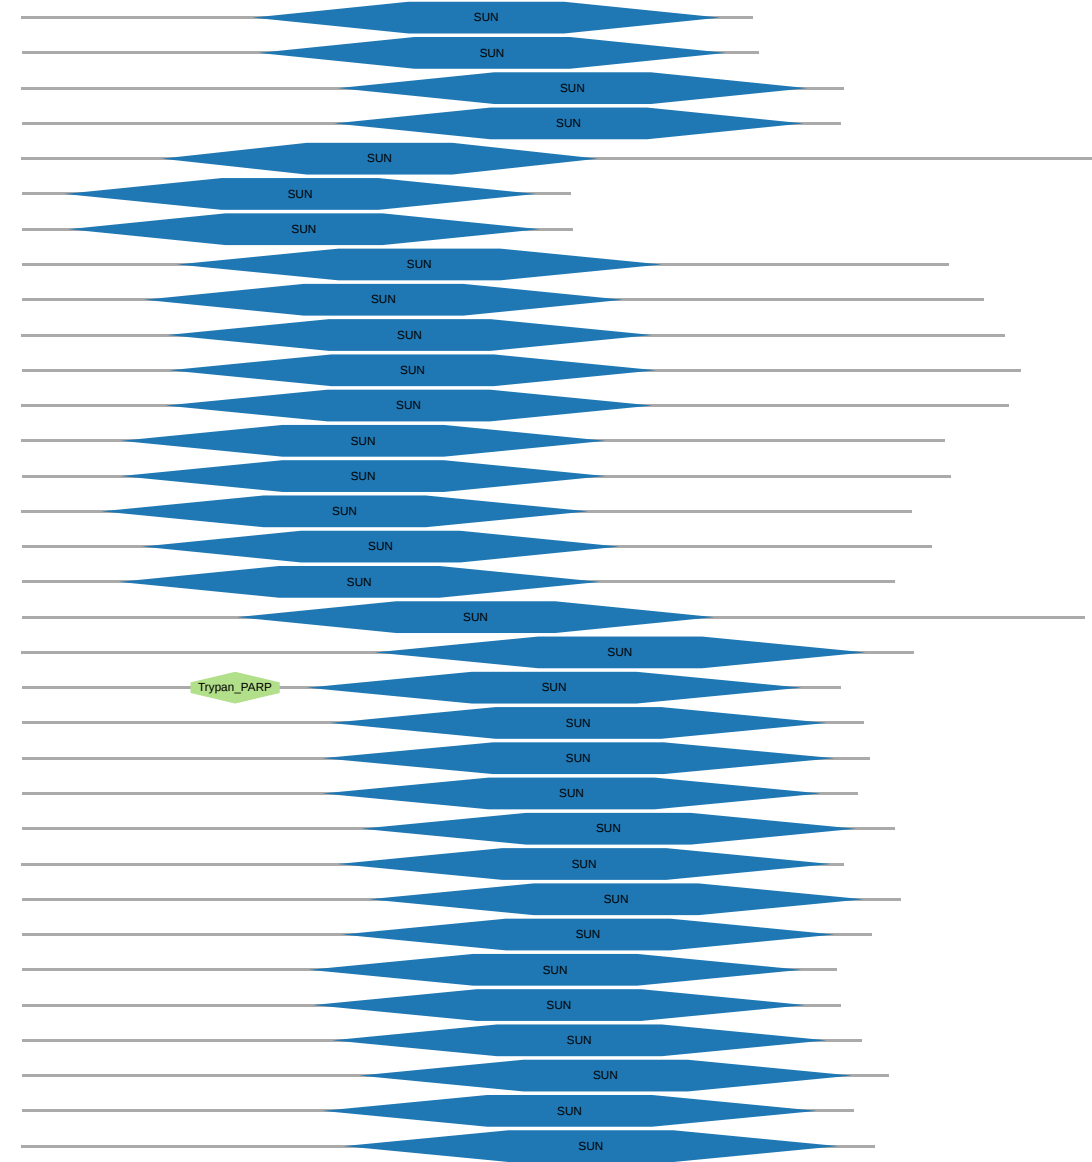

Supplement: s1 [file s1]

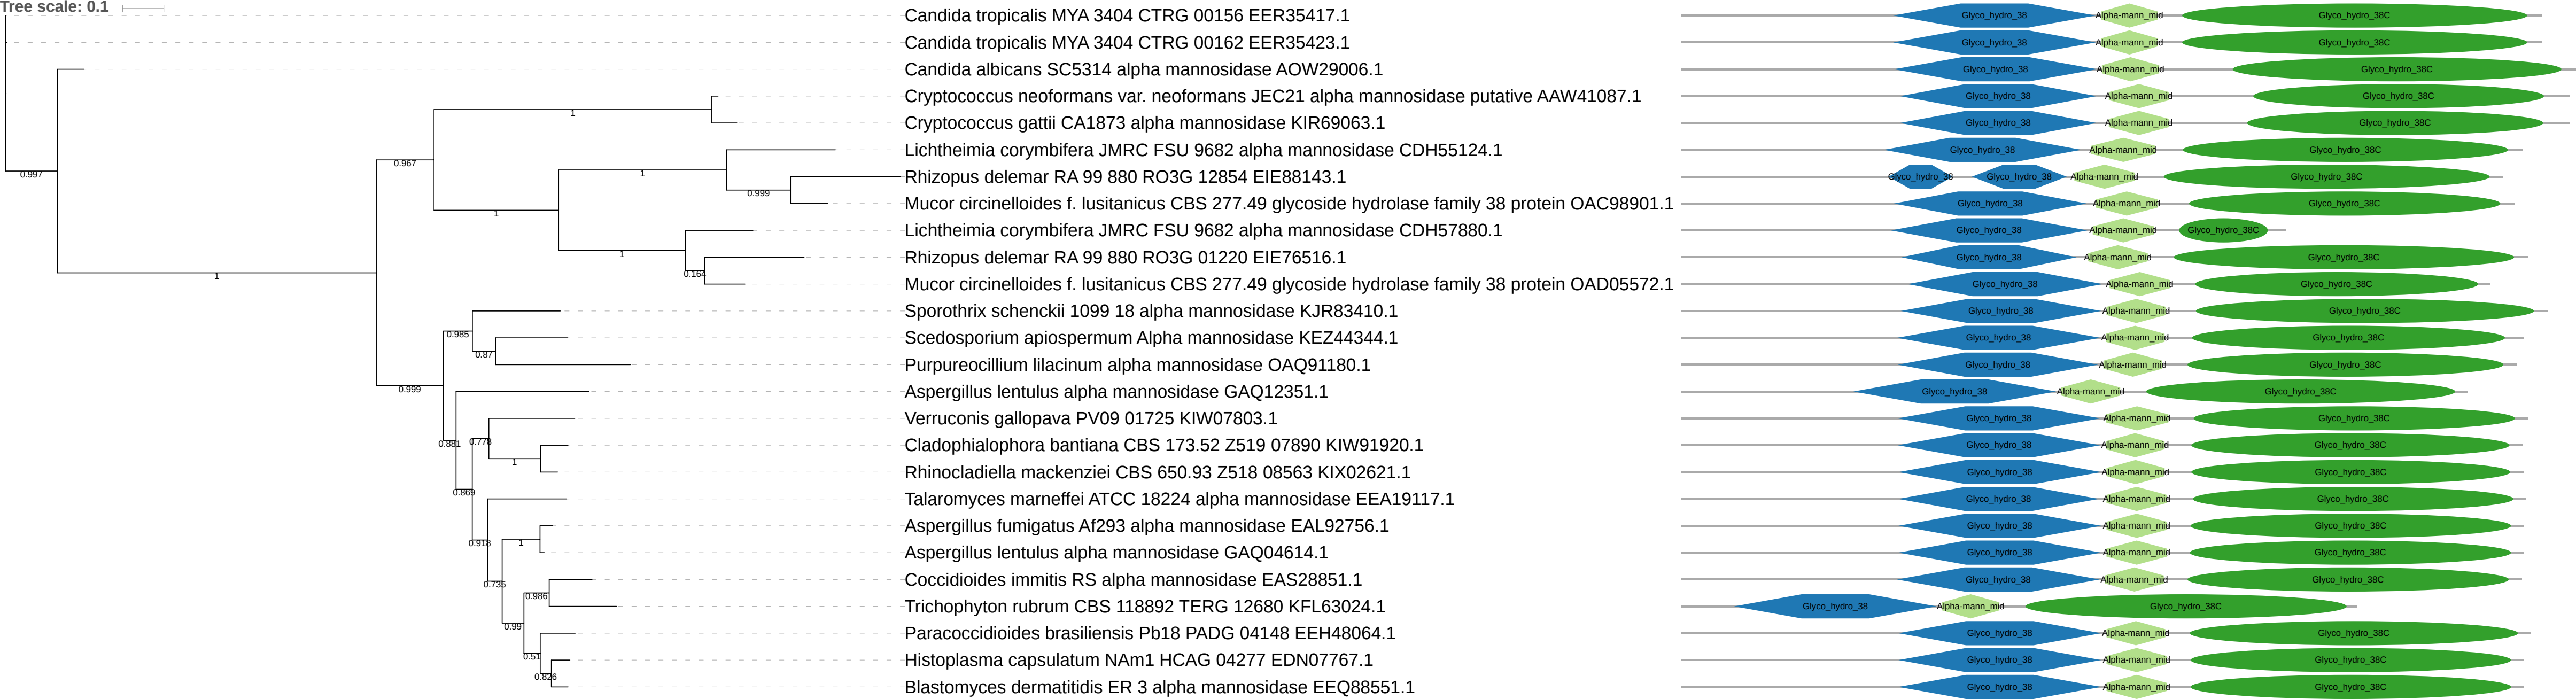

Supplement: s1 [file s1]

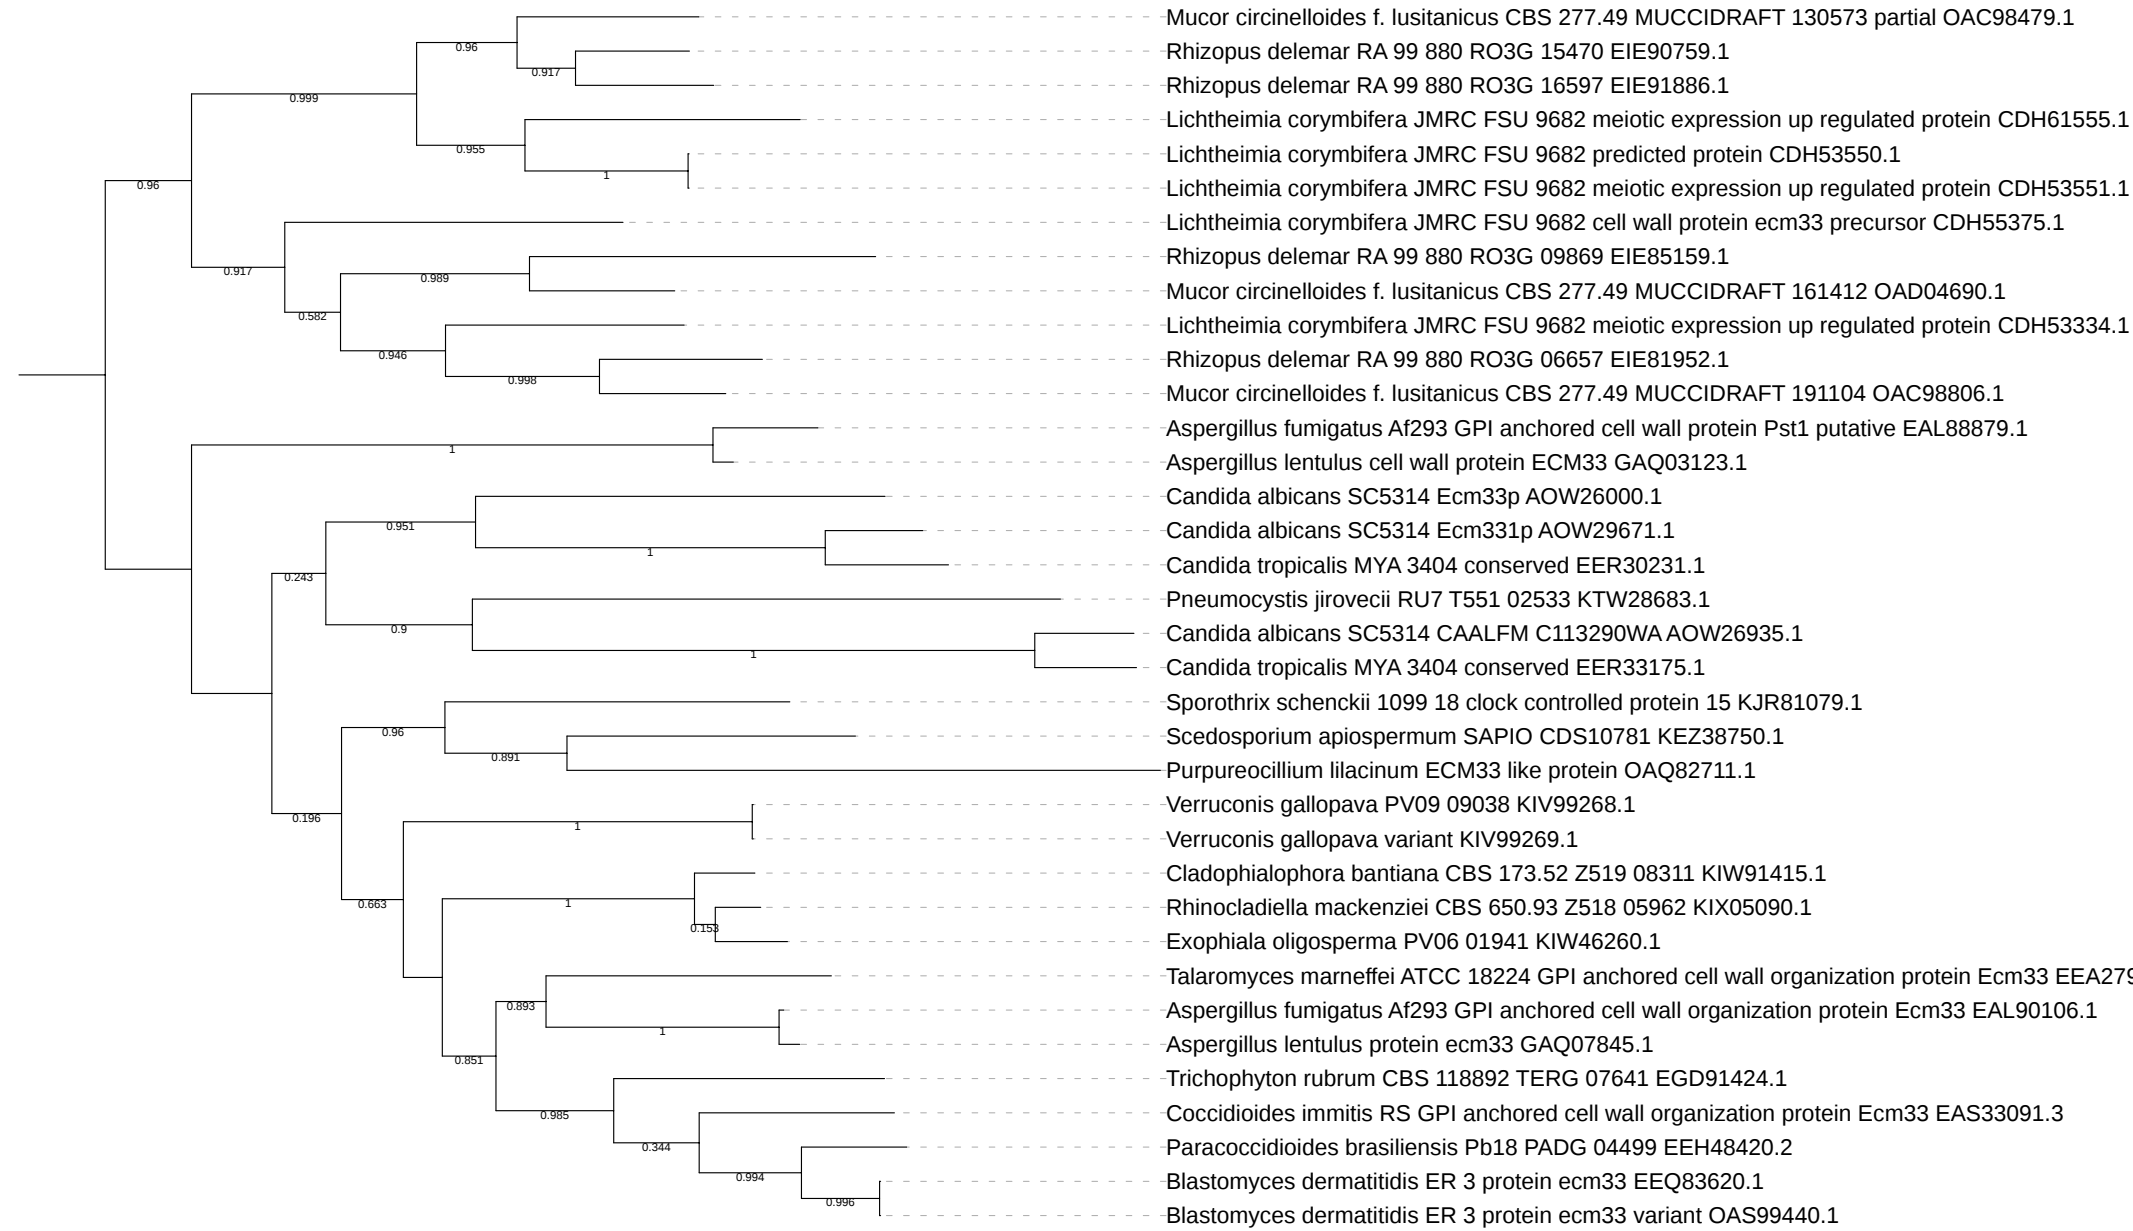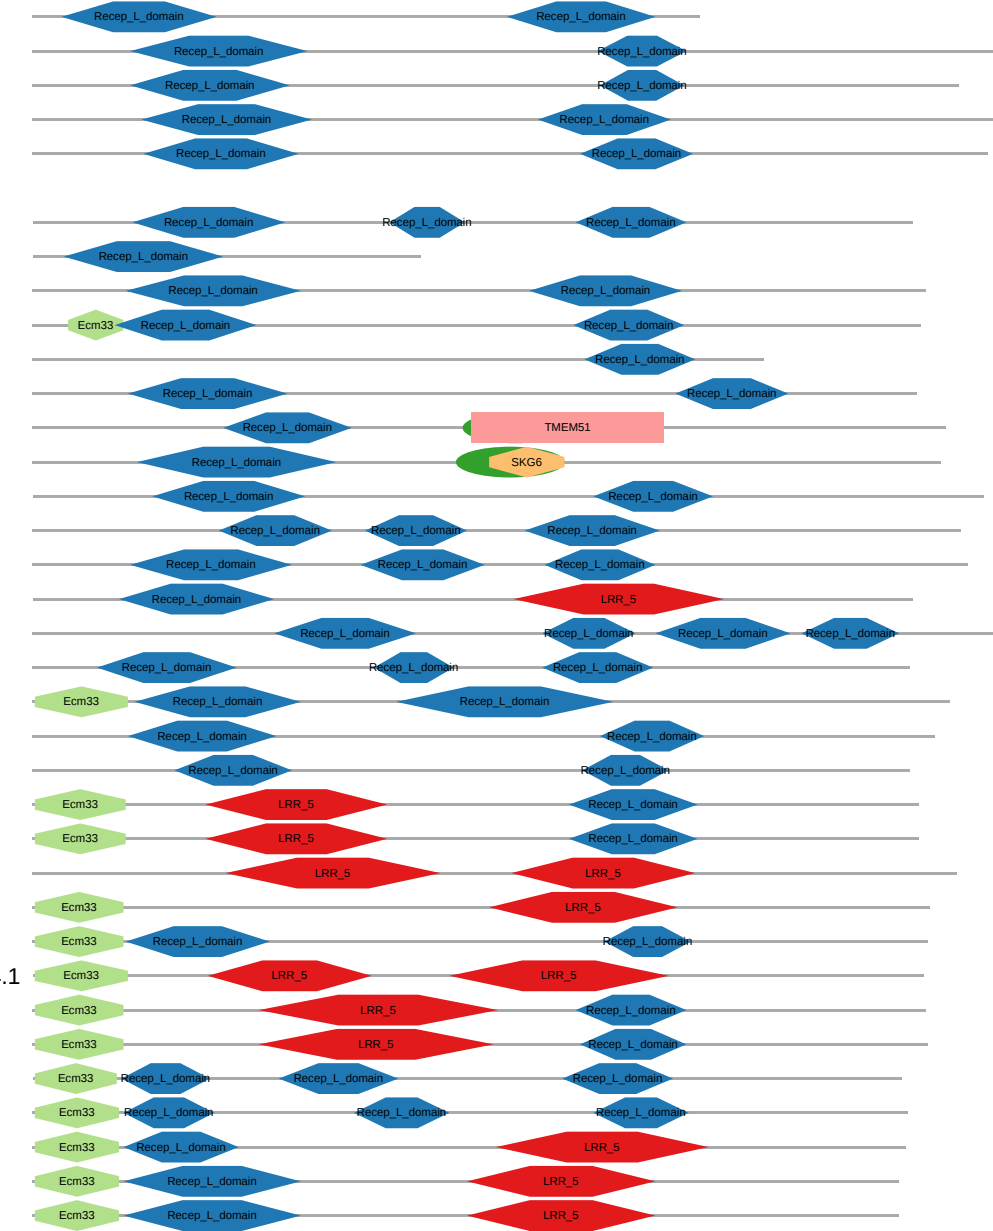

Supplement: s1 [file s1]

Tree scale: 1

Colored ranges

betaglucanase

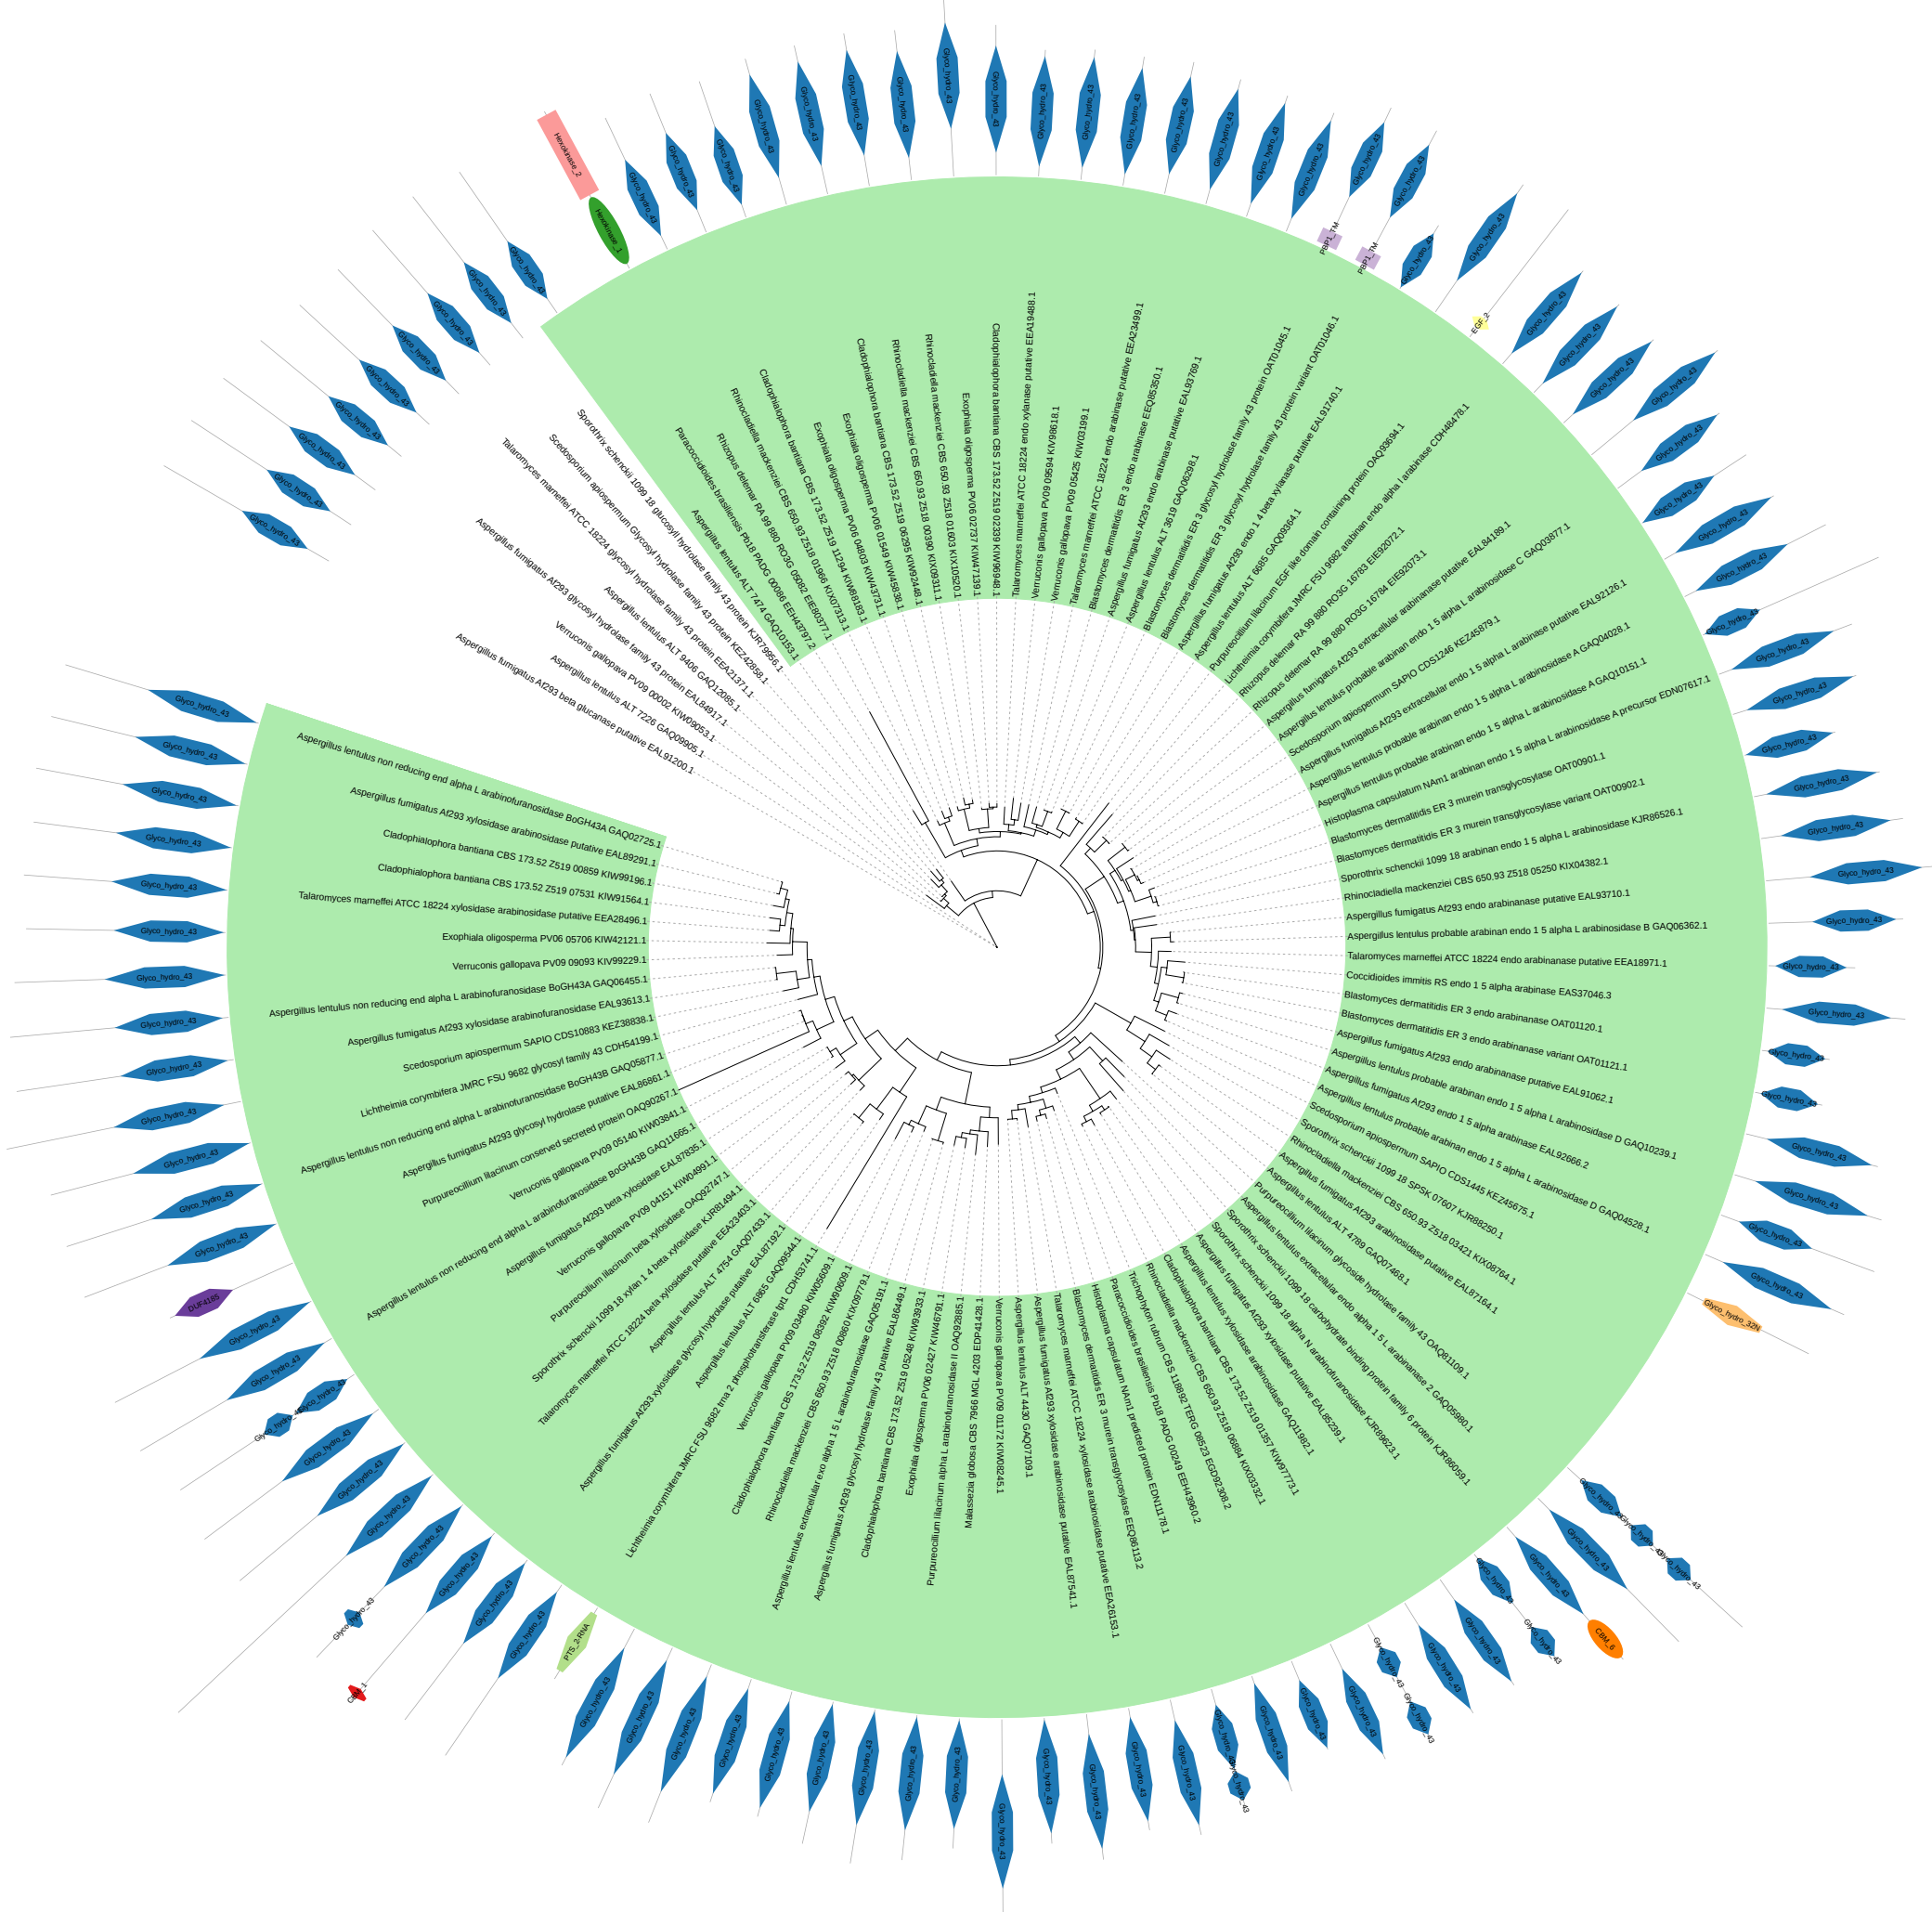

Supplement: s1 [file s1]

Tree scale: 1

Colored ranges

glucosaminidase

galactosidase

mannosidase

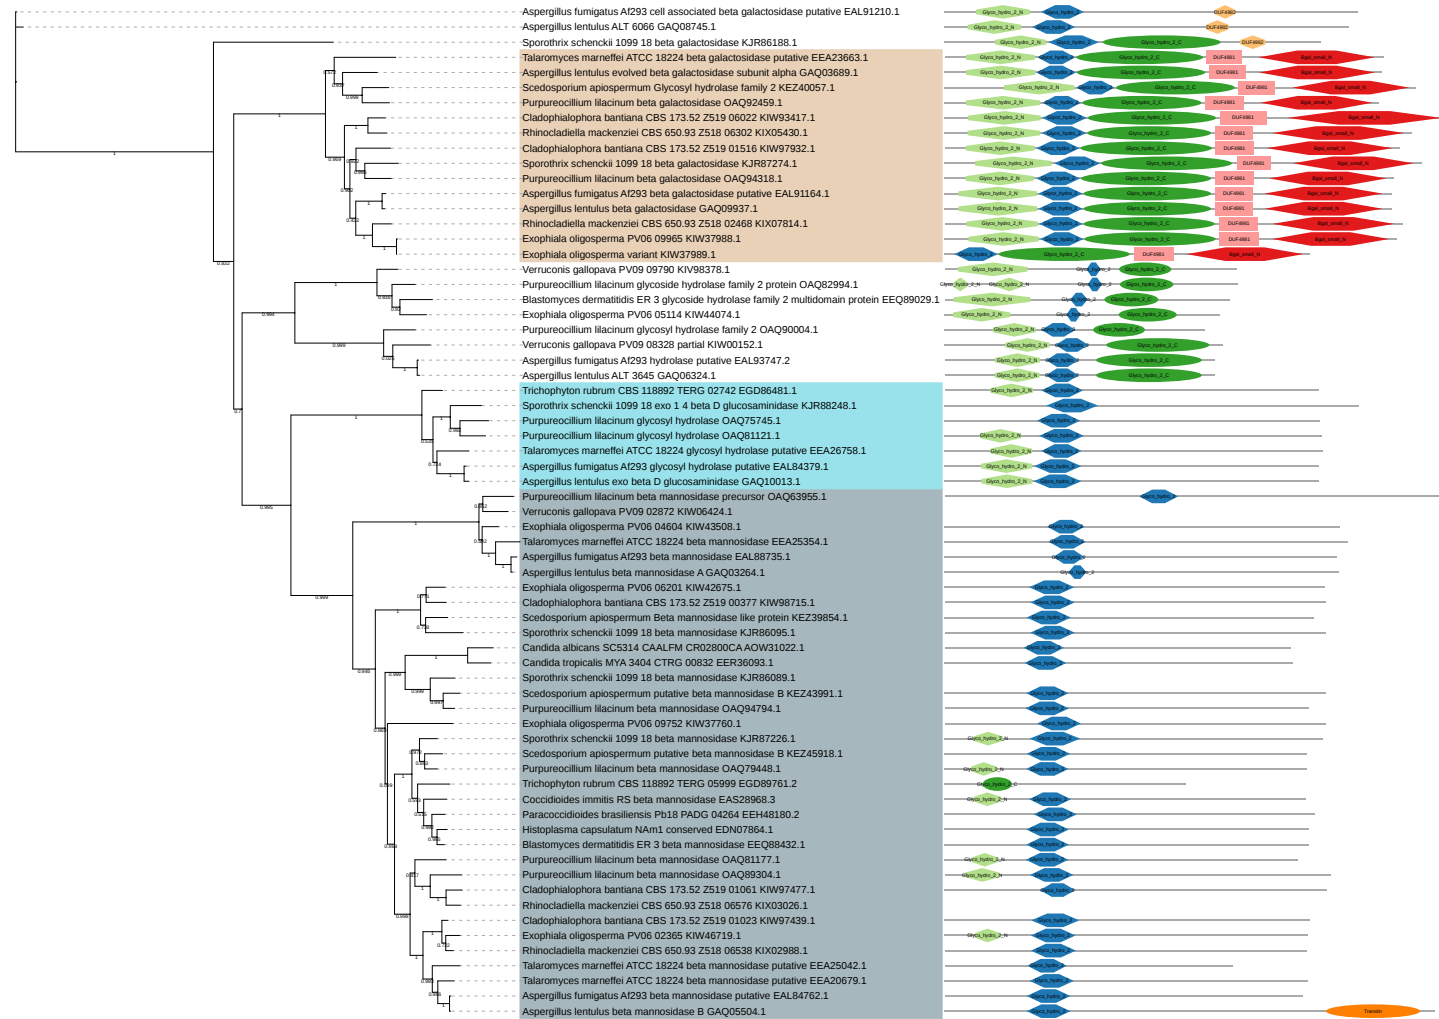

Supplement: s1 [file s1]

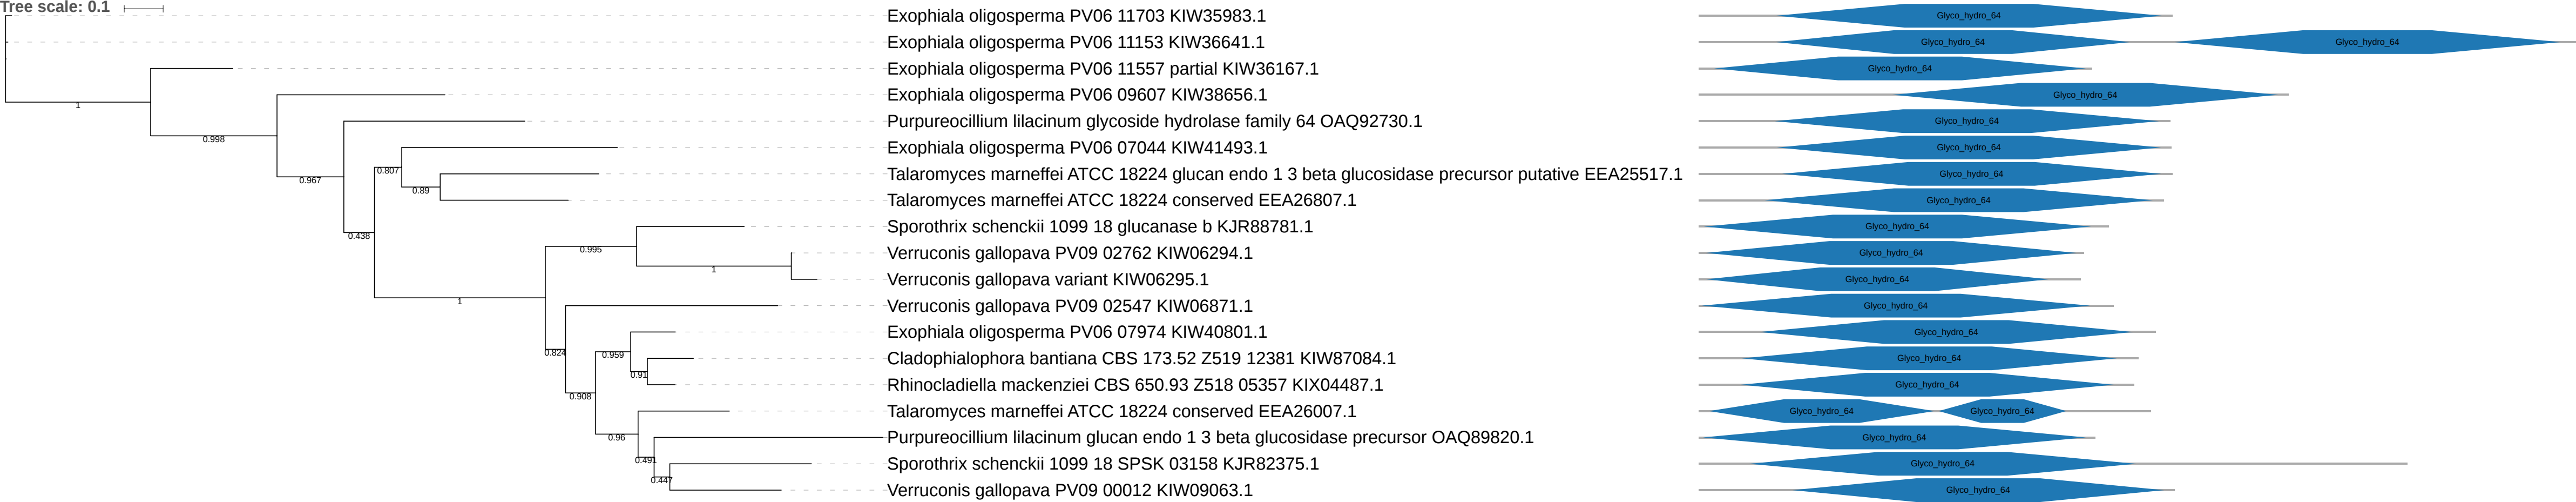

Supplement: s1 [file s1]

Tree scale: 1

## Colored ranges

 SOD Cu dismutase

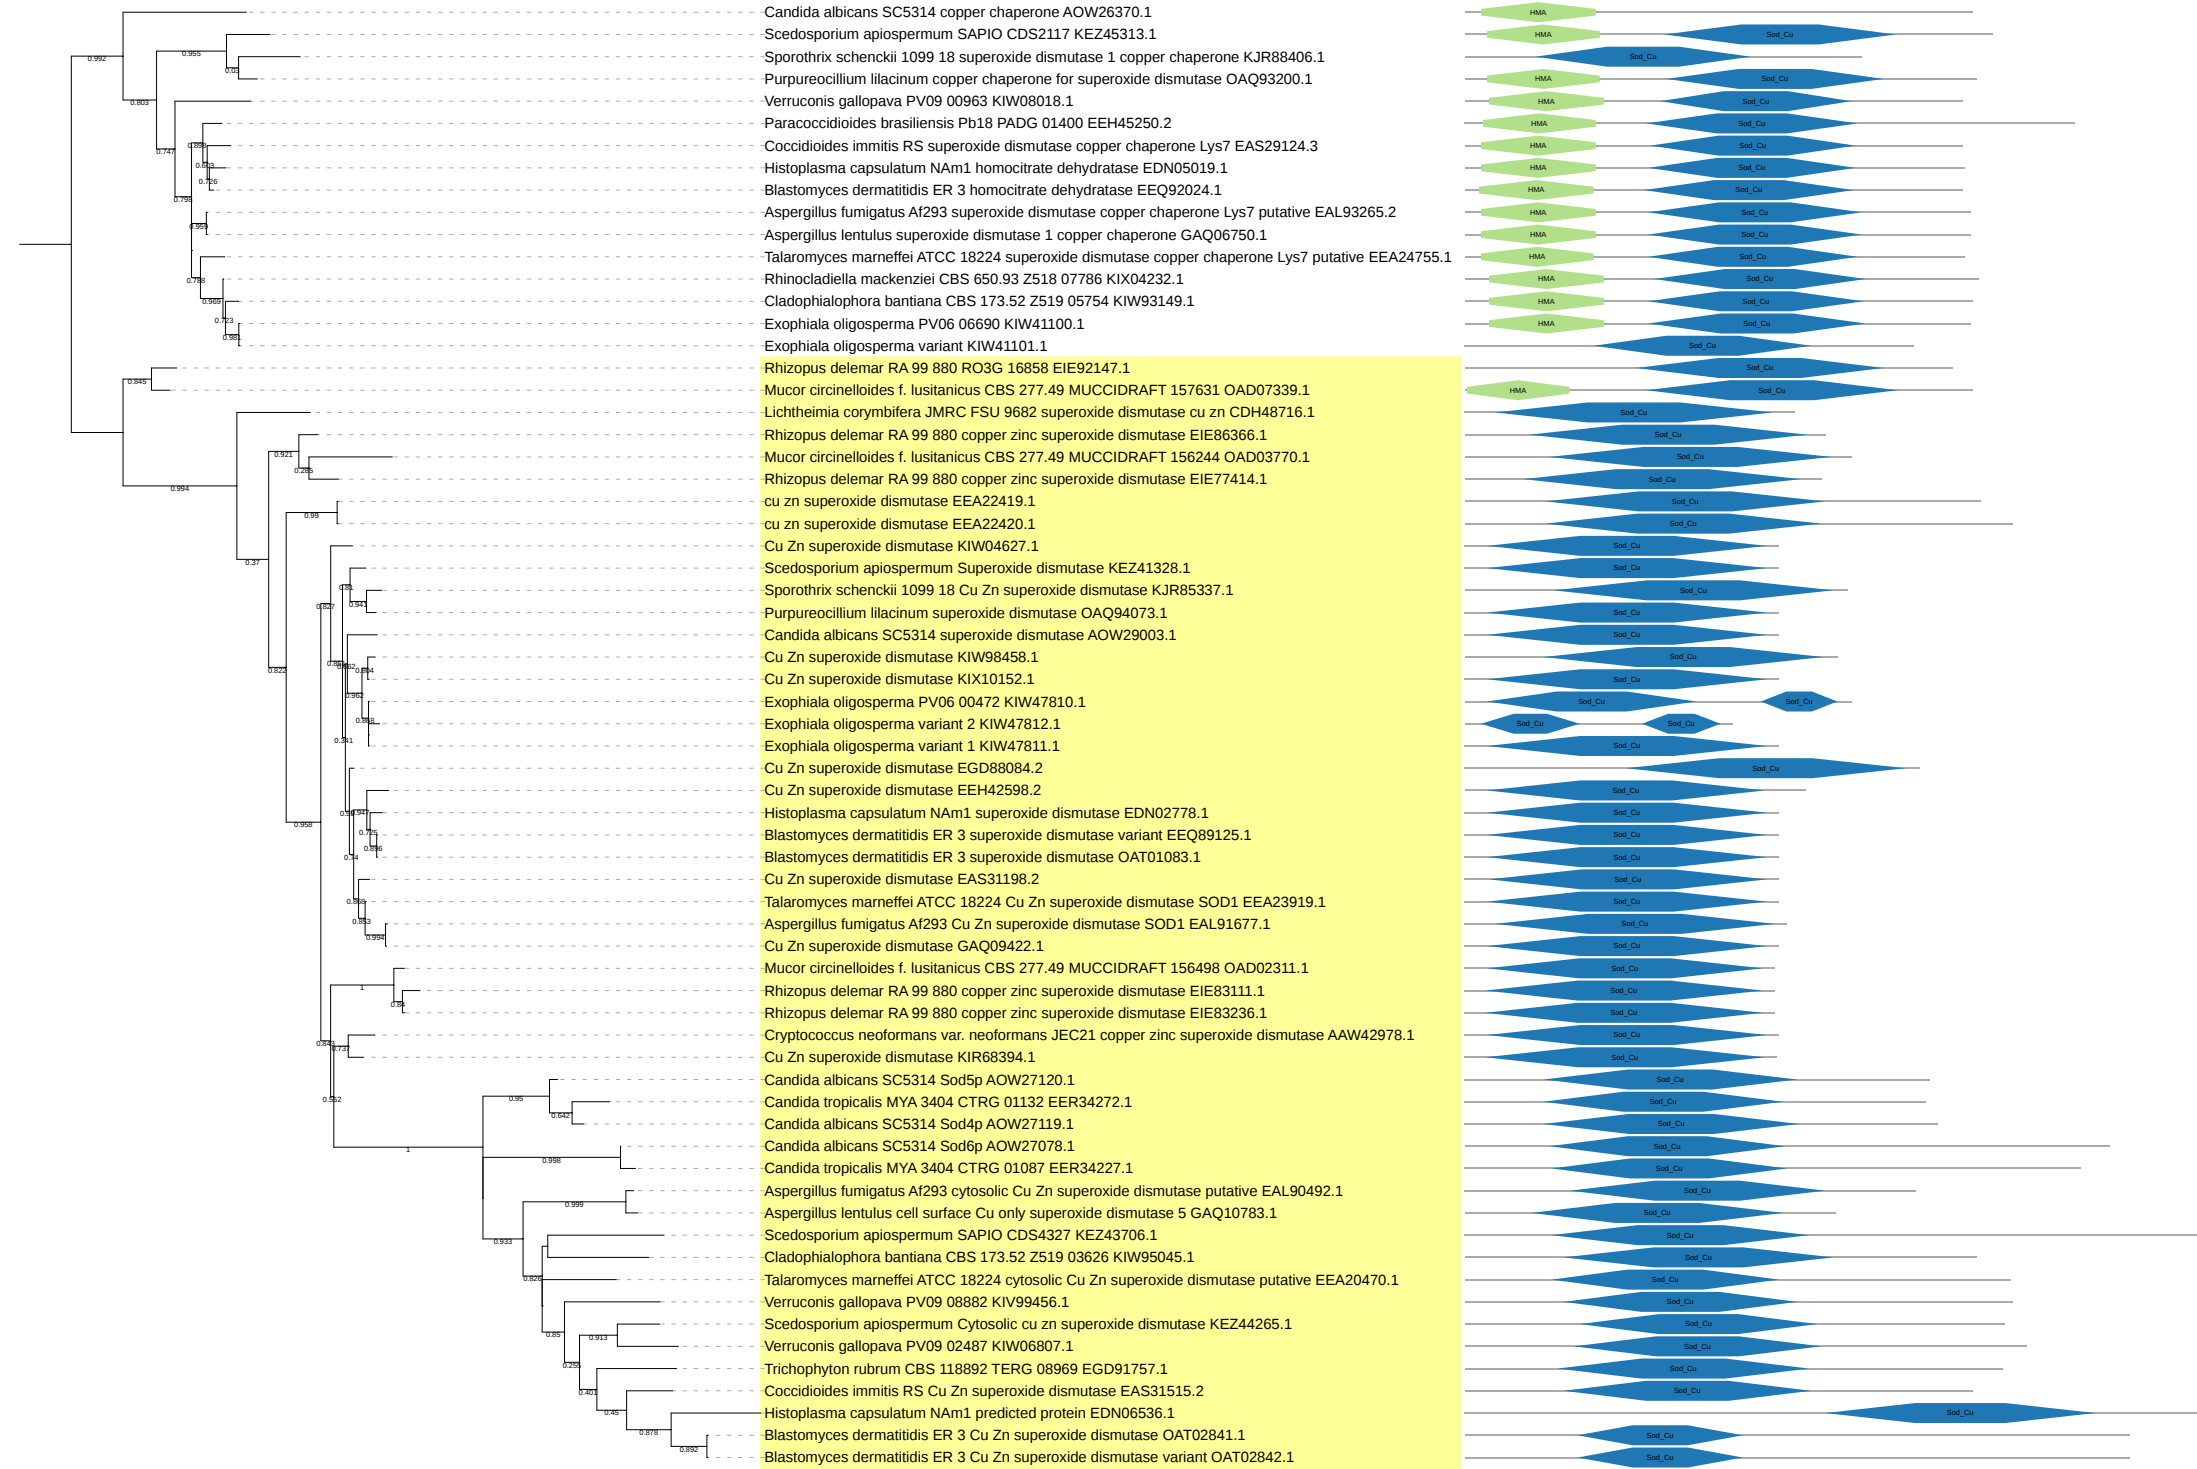

Supplement: s1 [file s1]

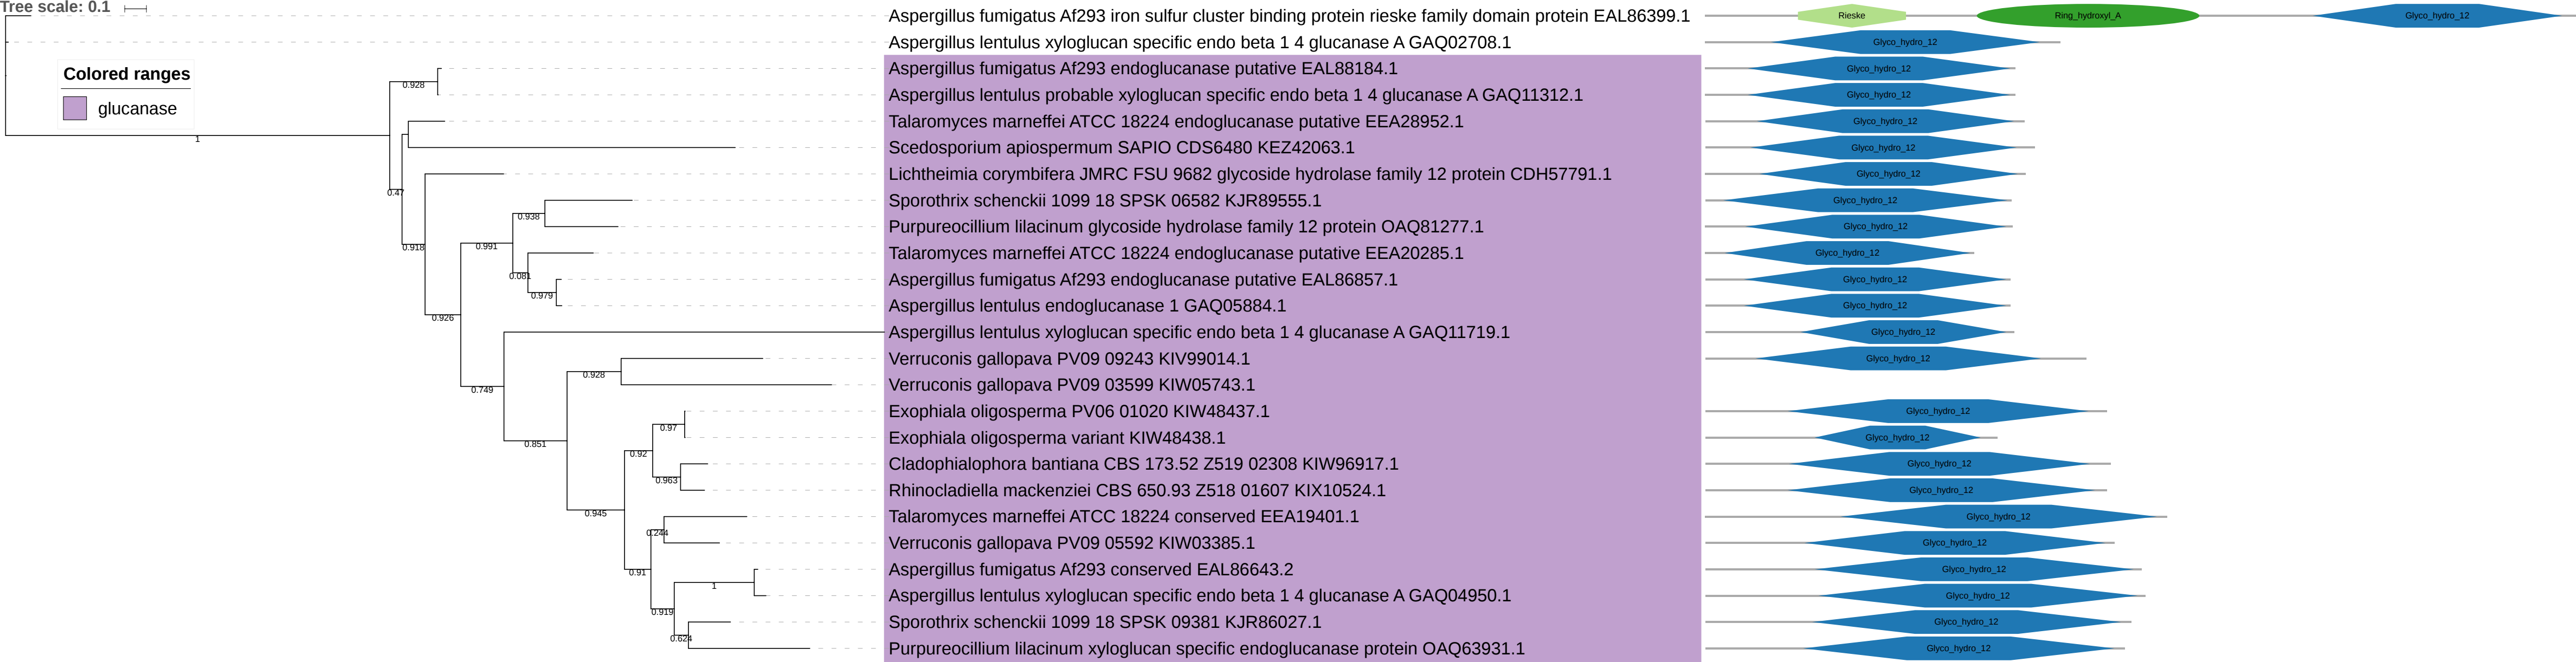

Supplement: s1 [file s1]

Tree scale: 0.1

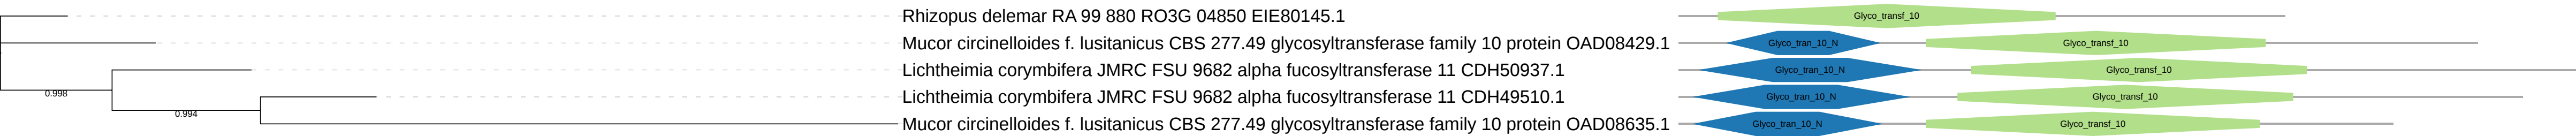

Supplement: s1 [file s1]

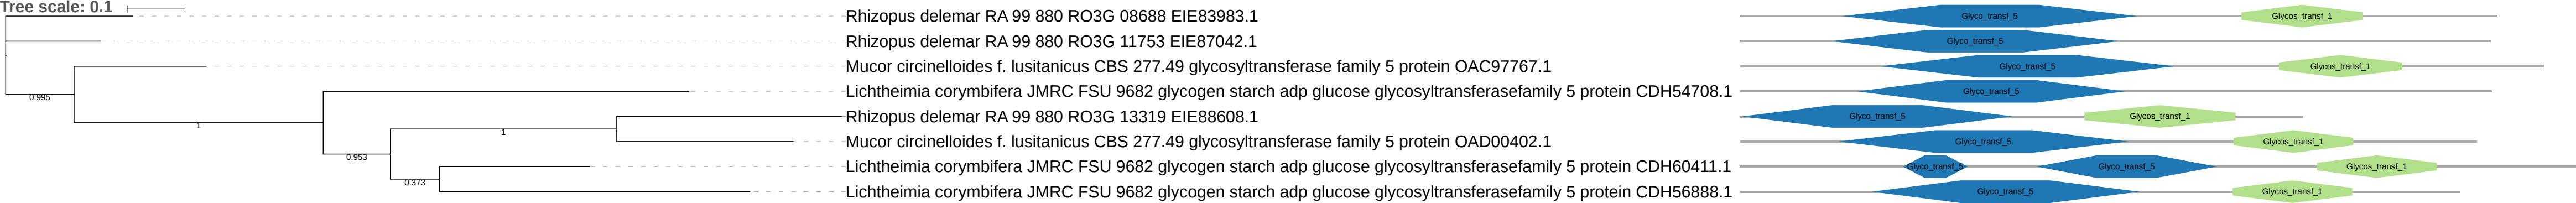

Supplement: s1 [file s1]

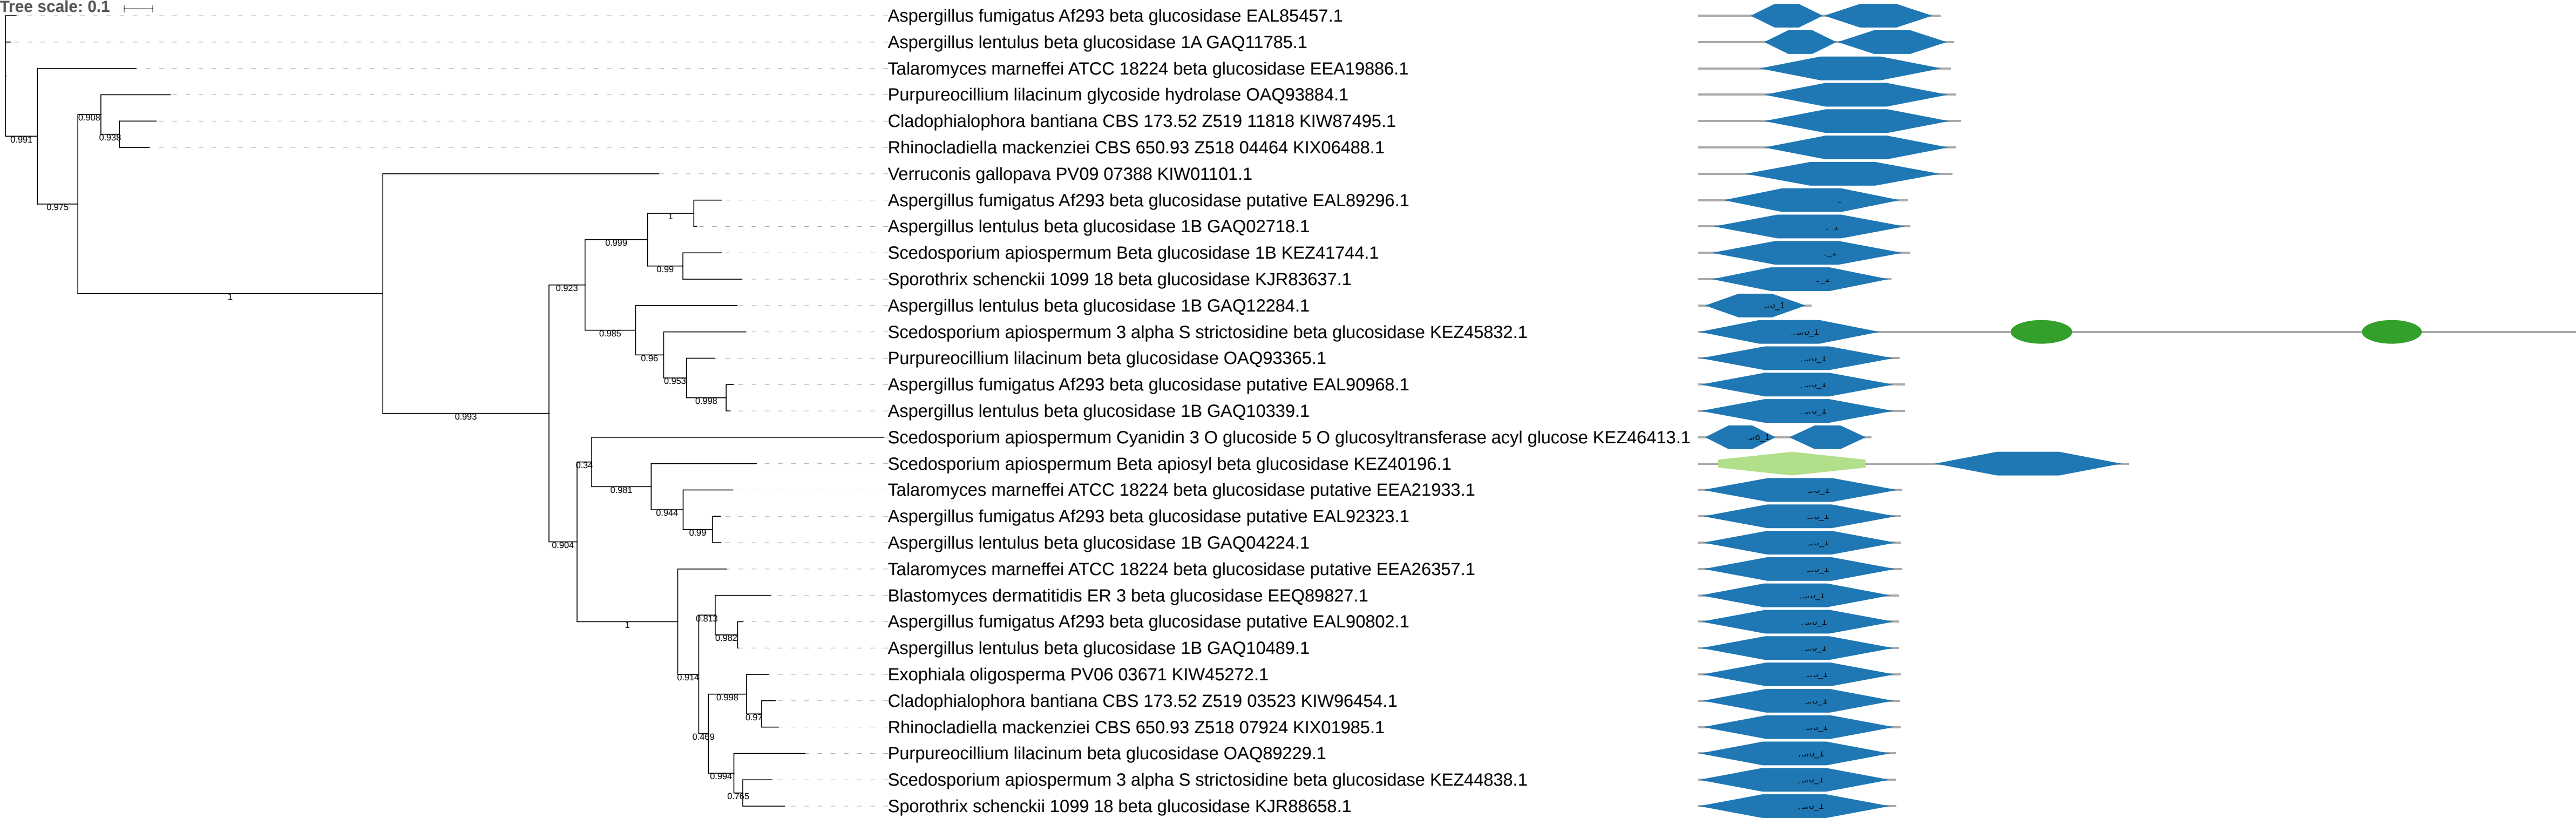

Supplement: s1 [file s1]

Tree scale: 0.1

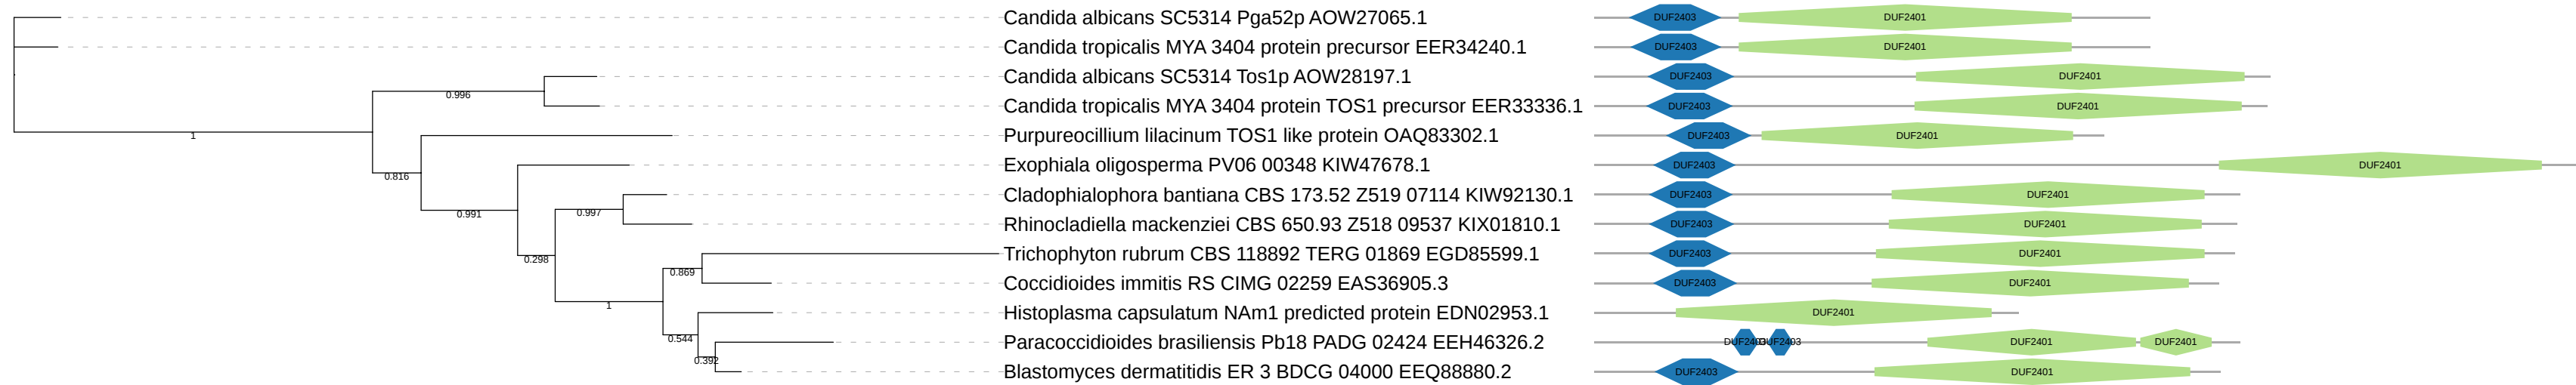

Supplement: s1 [file s1]

Tree scale: 0.1

Colored ranges

chitosanase

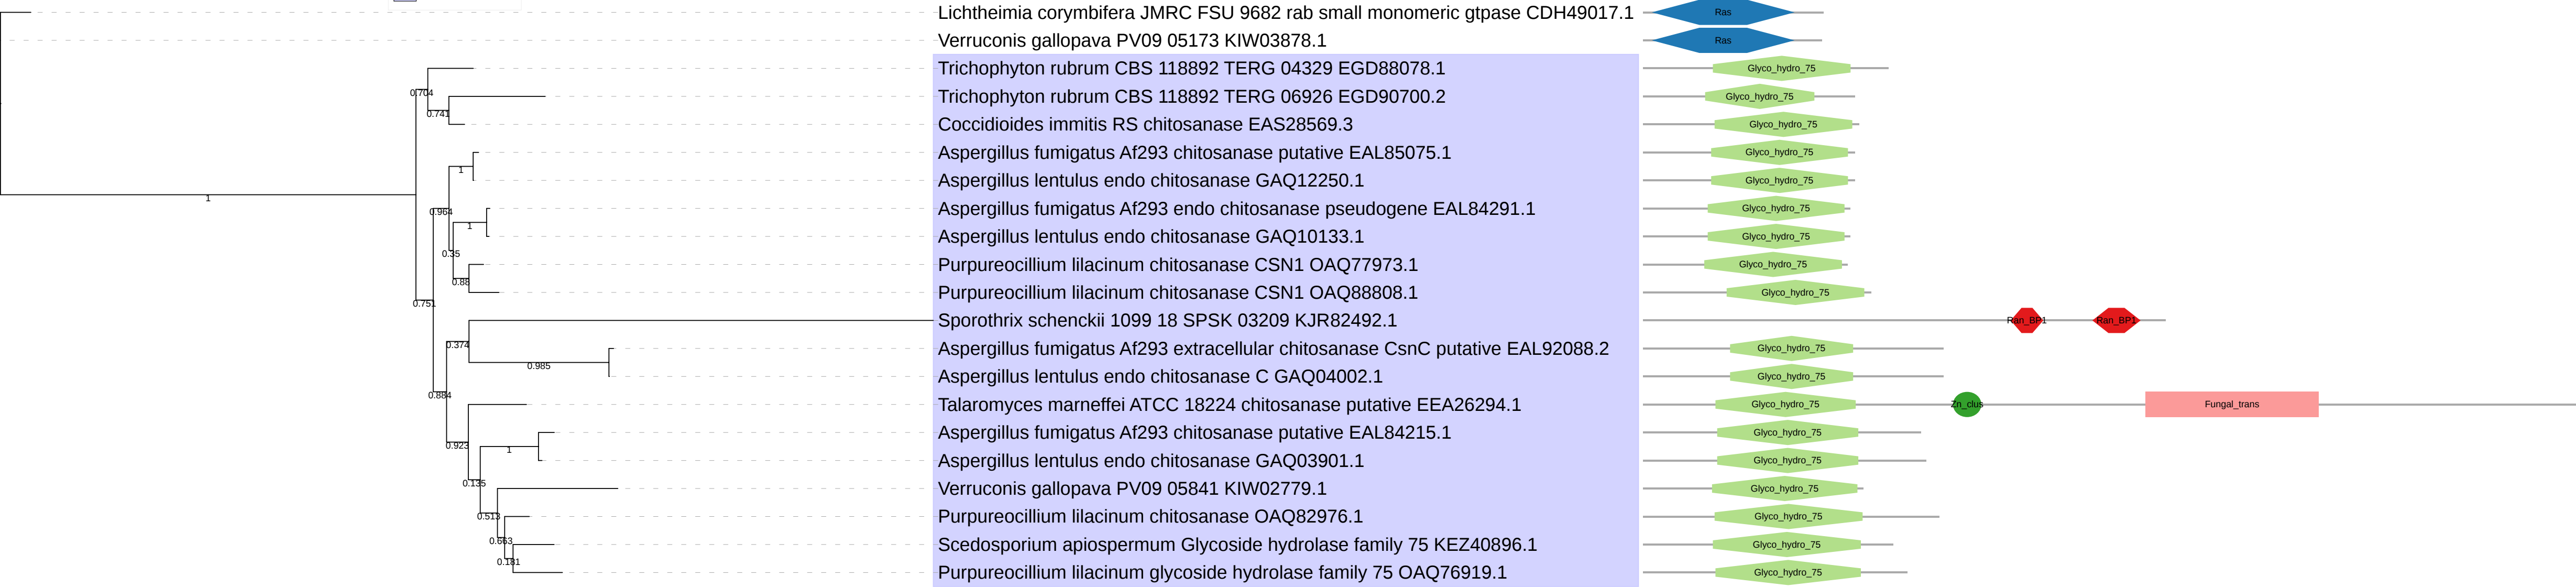

Supplement: s1 [file s1]

Tree scale: 0.1

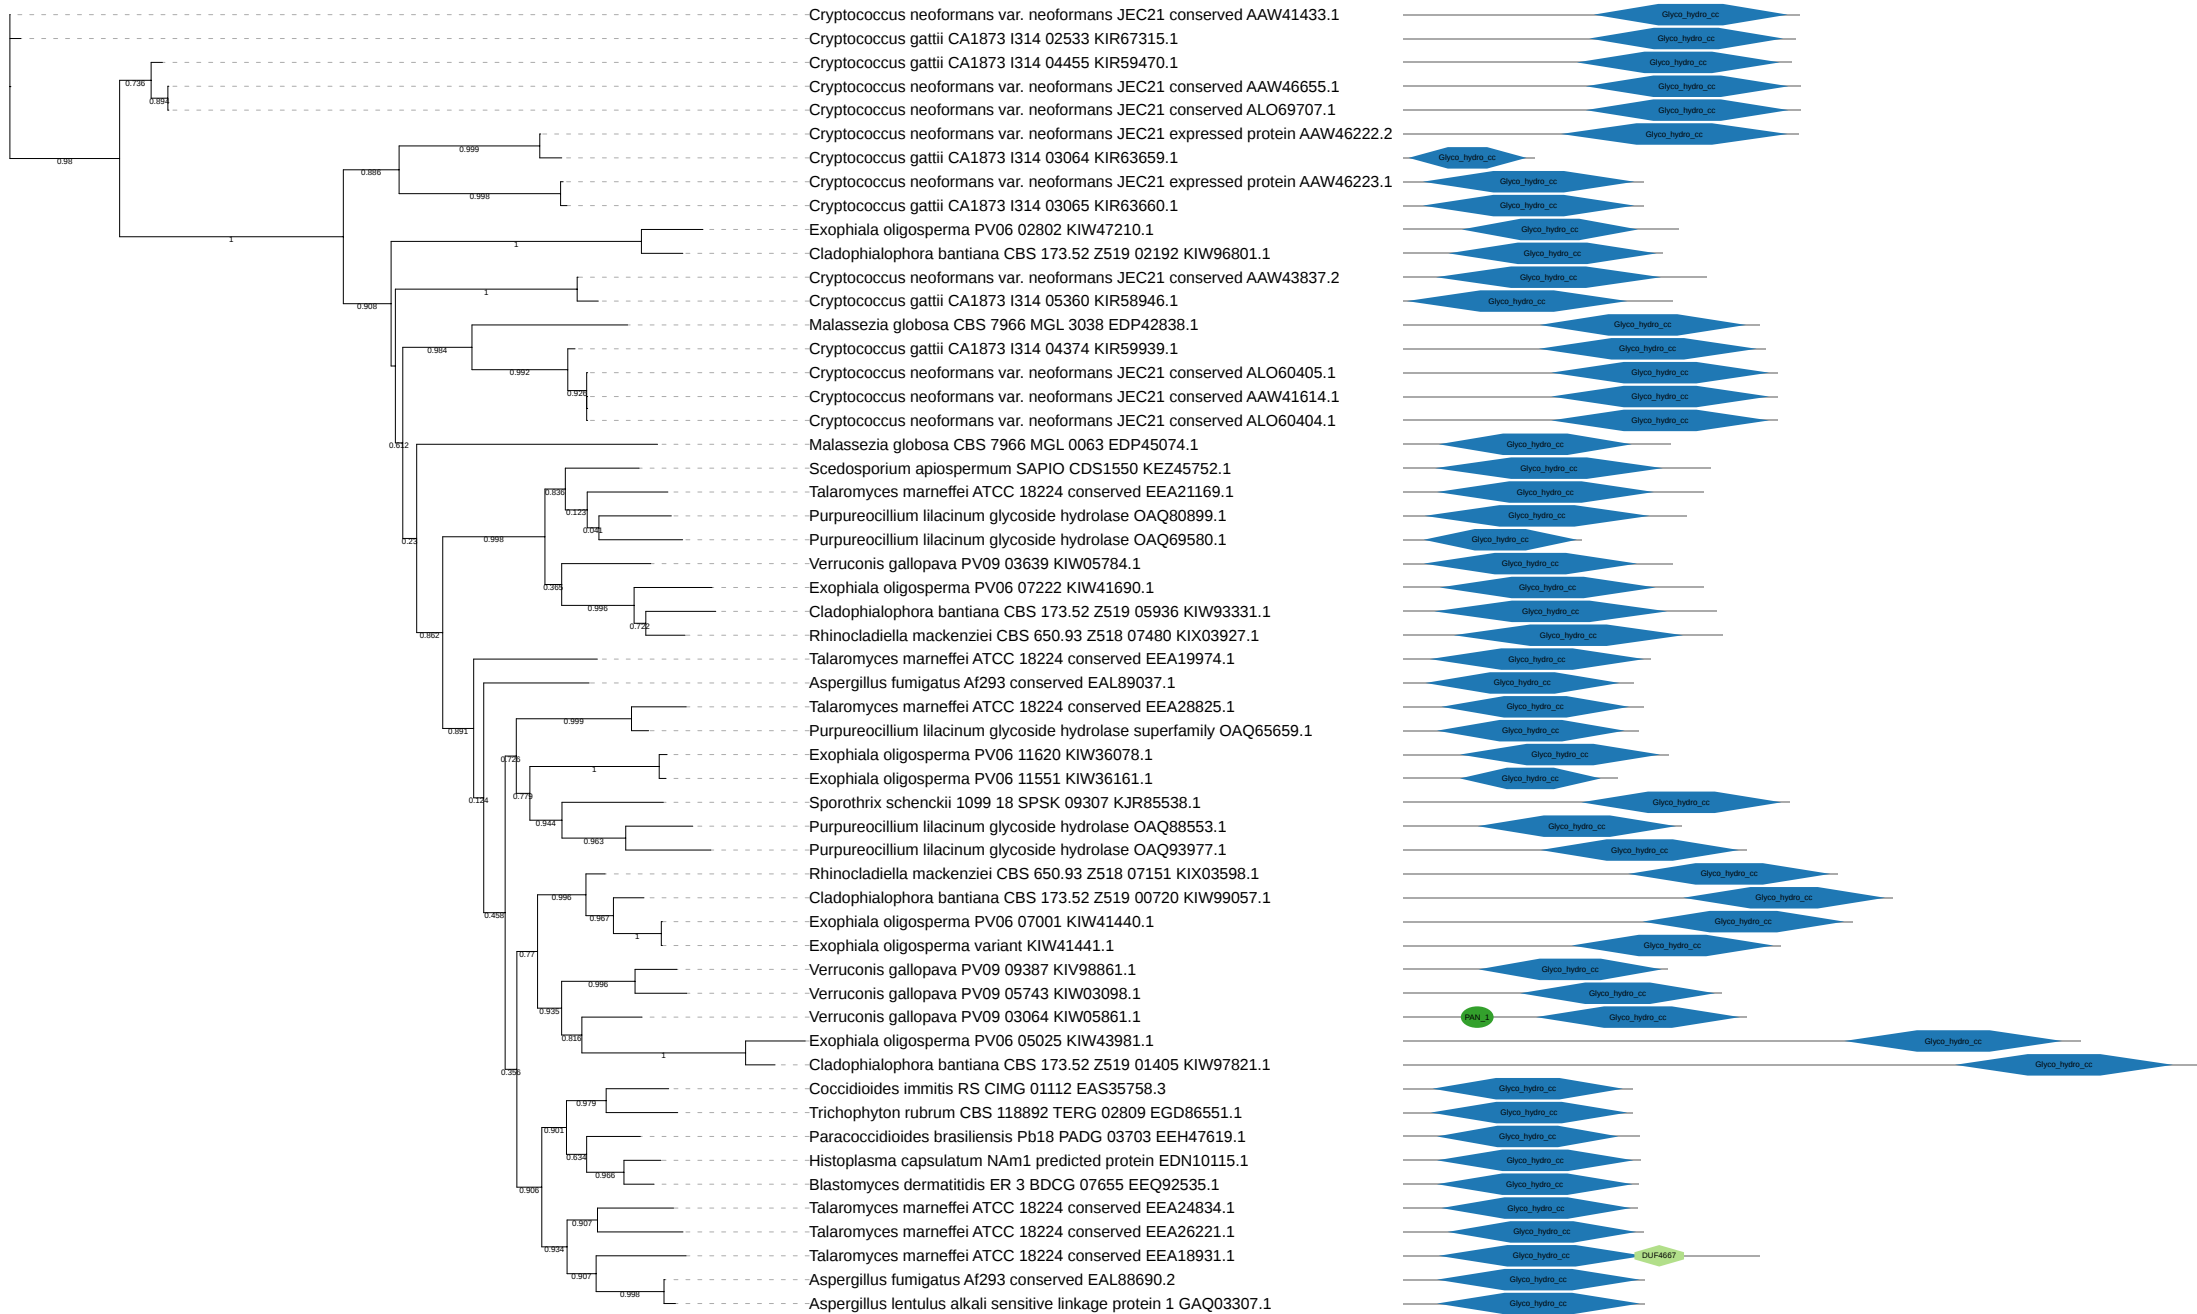

Supplement: s1 [file s1]

Tree scale: 1

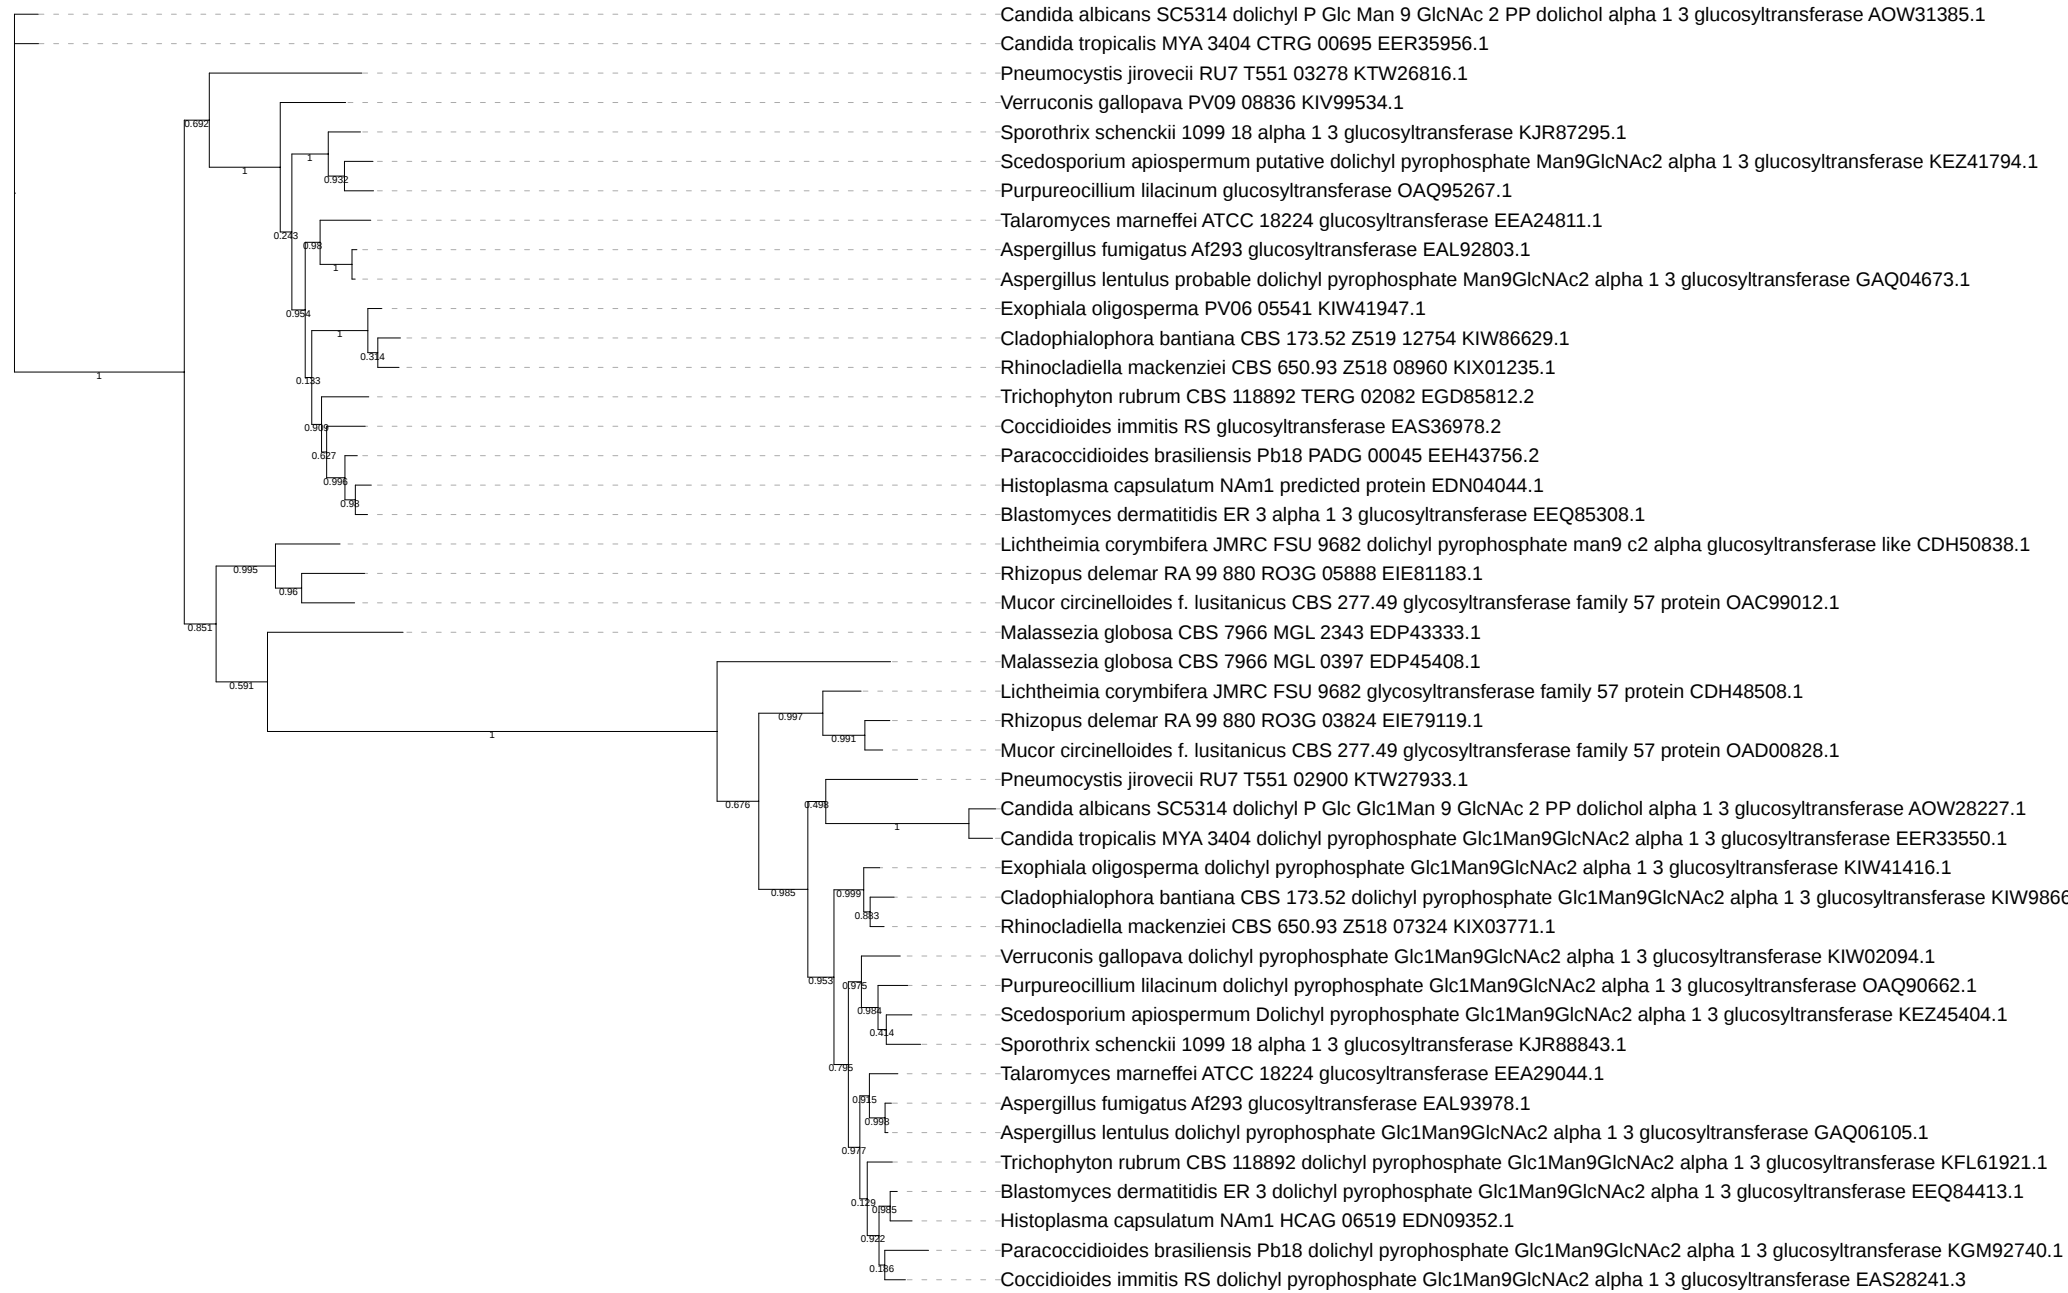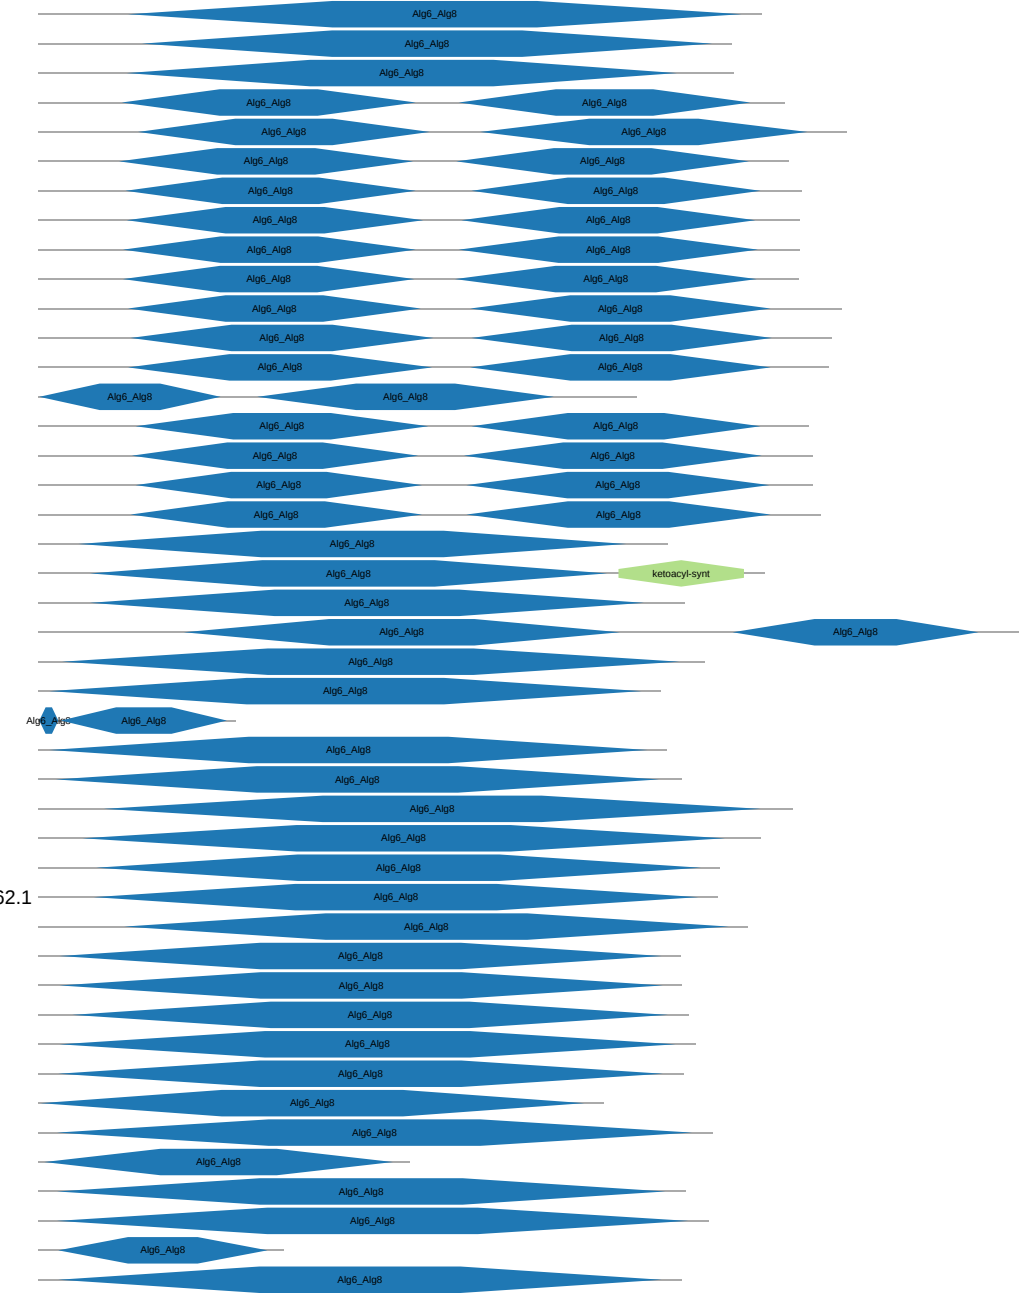

Supplement: s1 [file s1]

Tree scale: 1

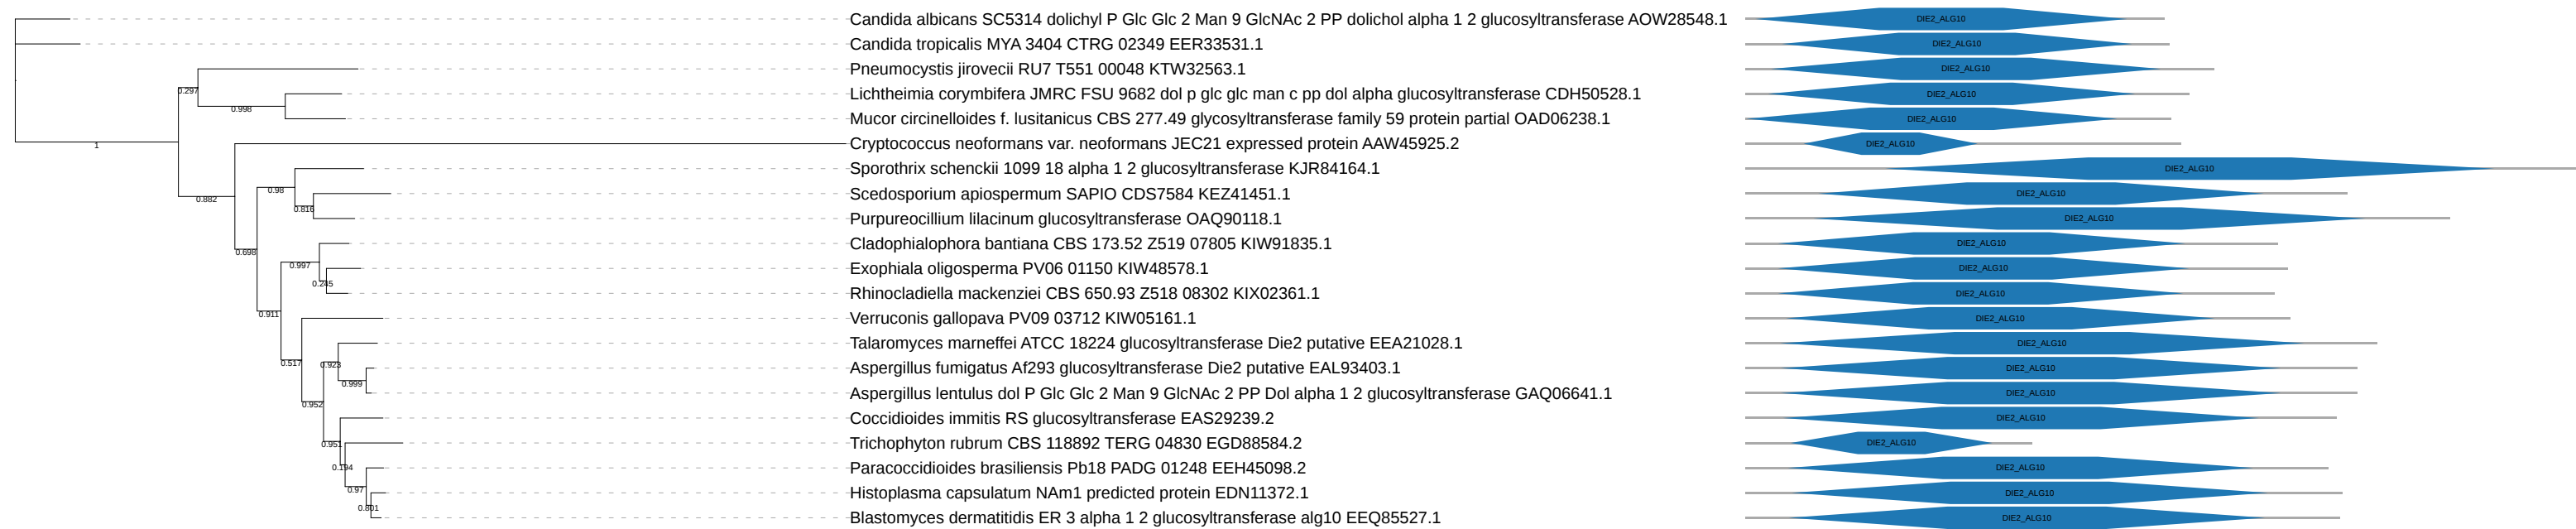

Supplement: s1 [file s1]

Tree scale: 0.1

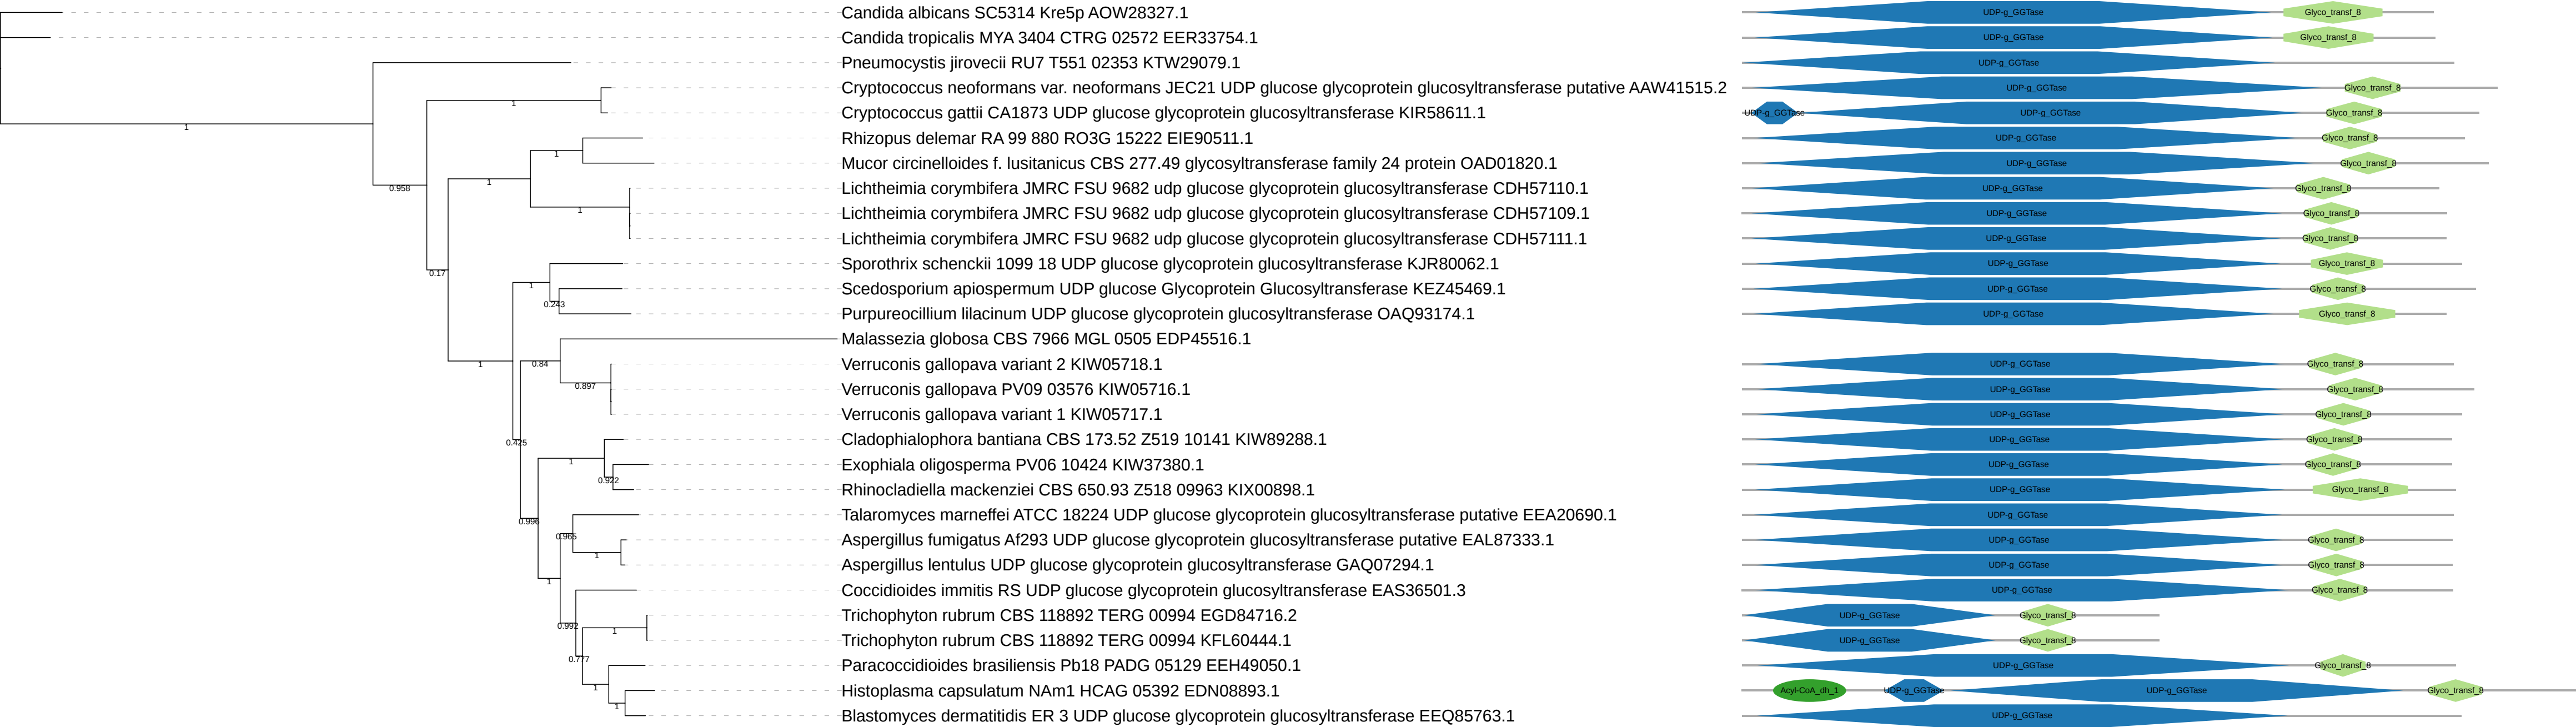

Supplement: s1 [file s1]

Tree scale: 1

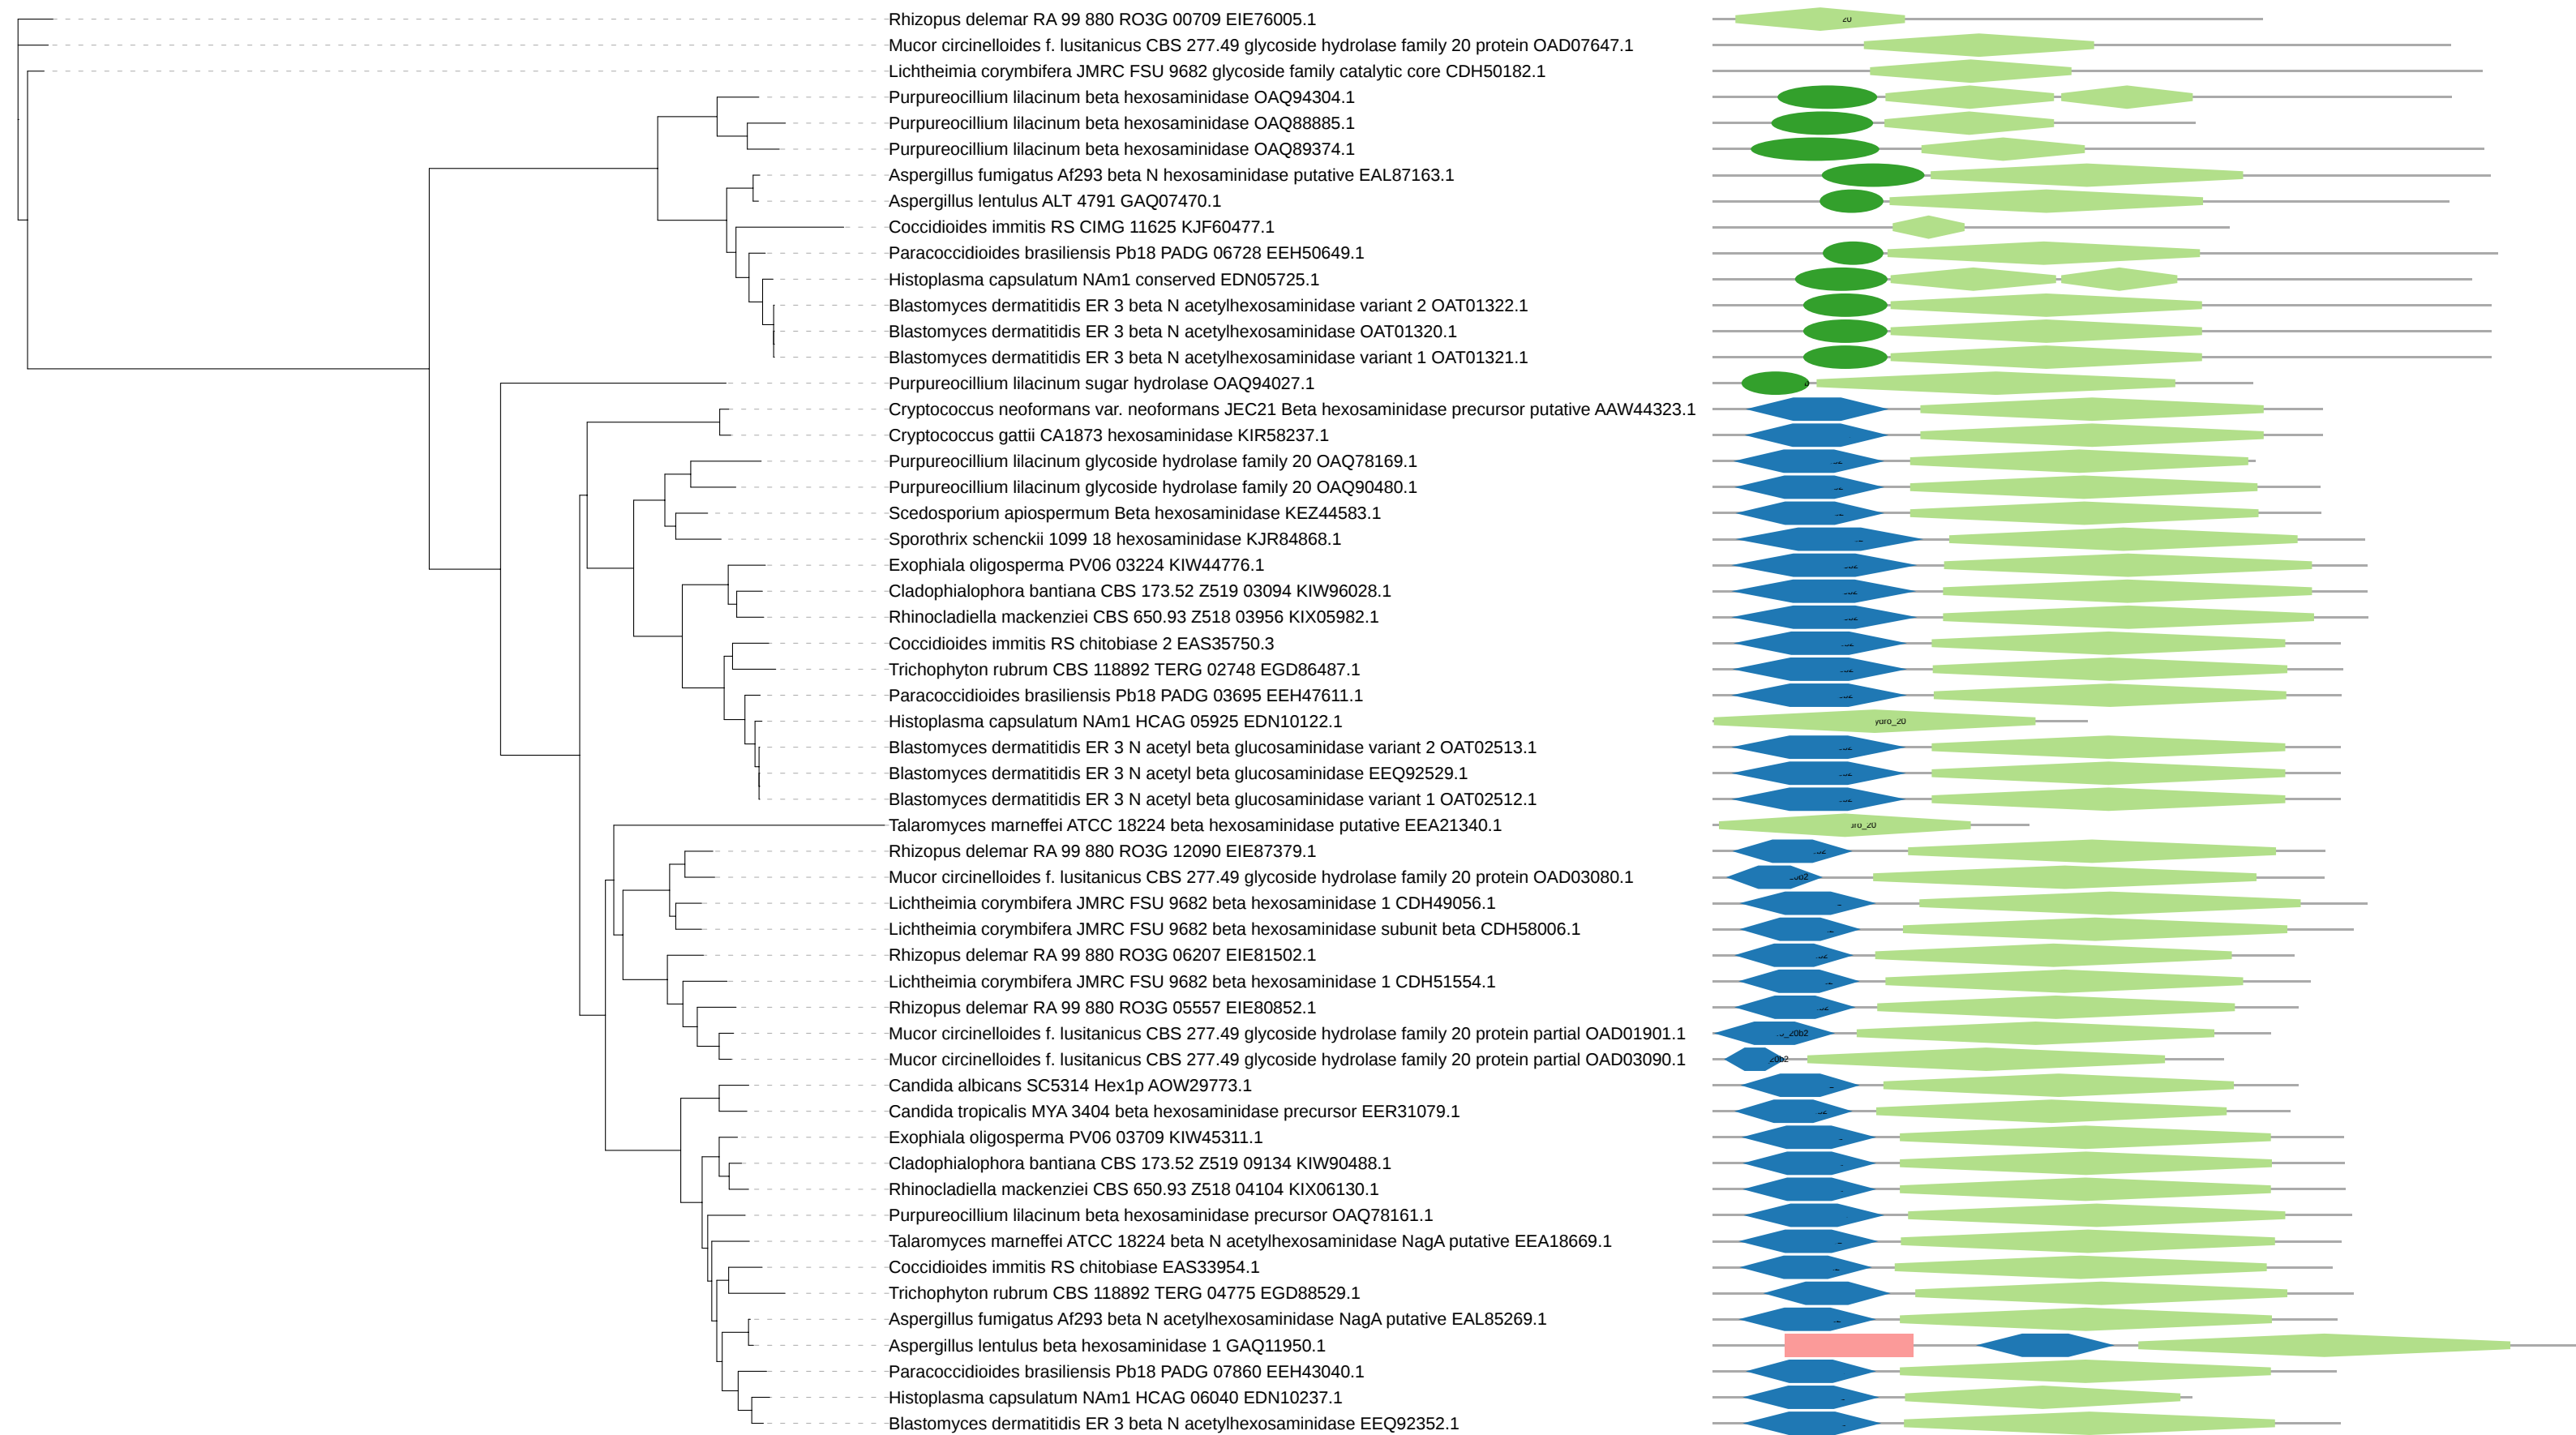

Supplement: s1 [file s1]

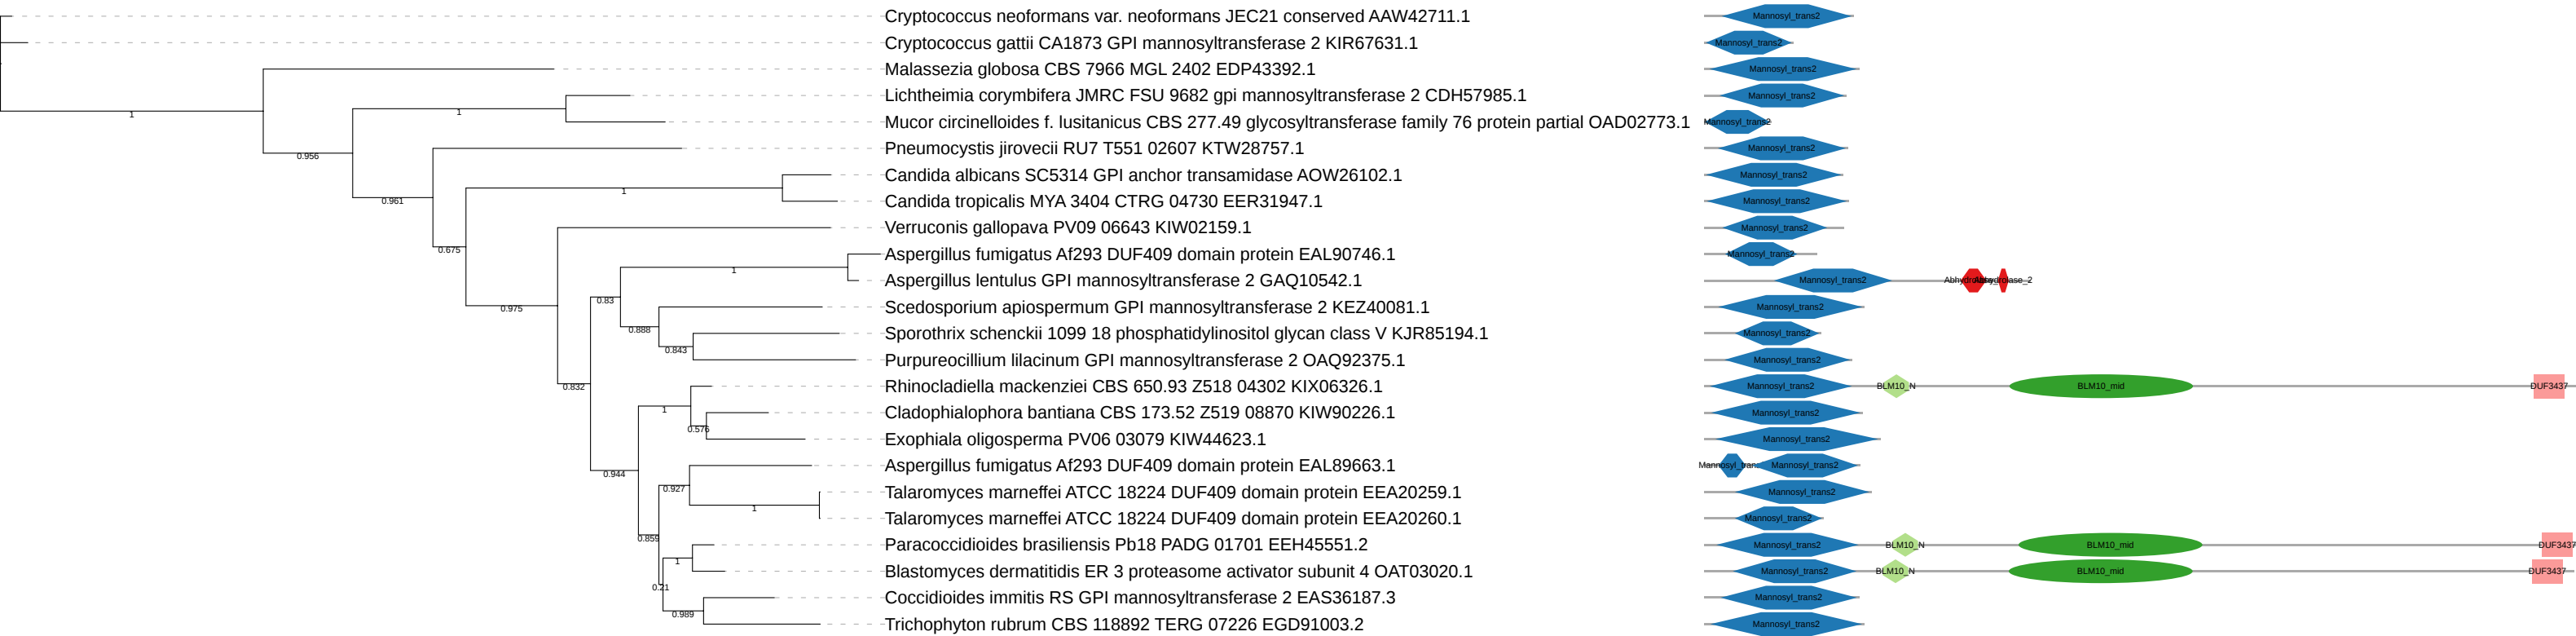

Supplement: s1 [file s1]

---

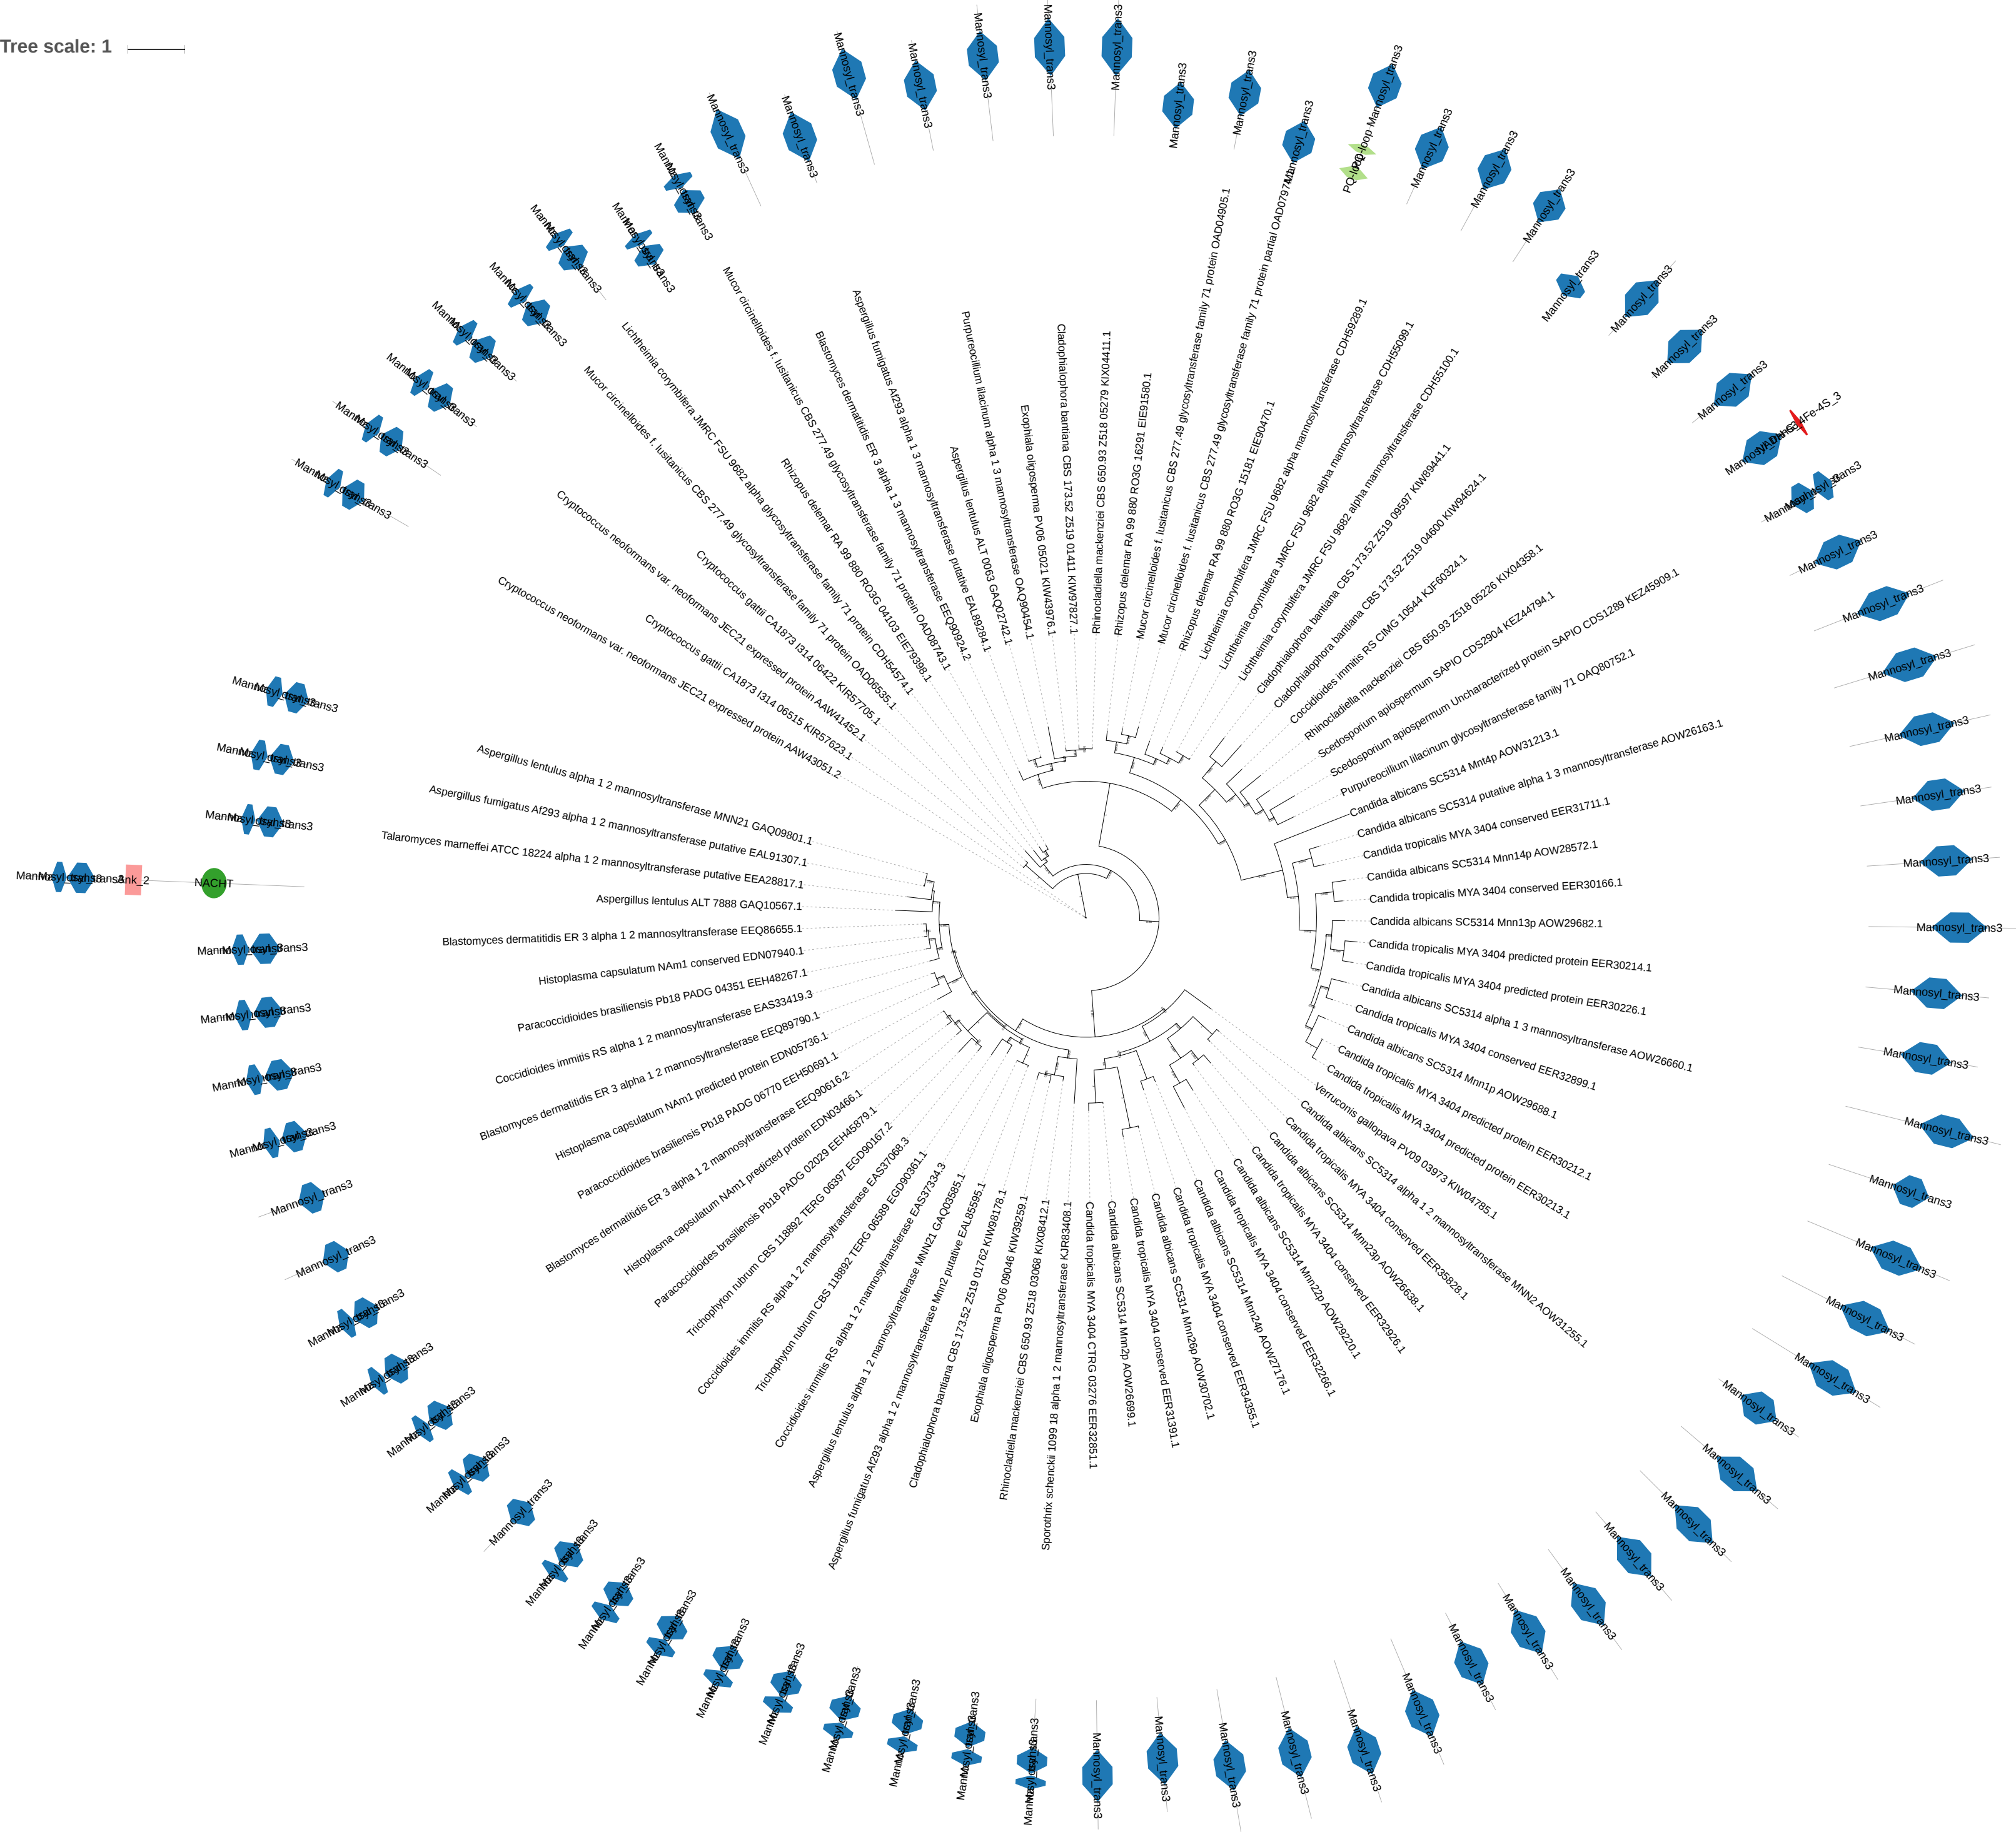

Supplement: s1 [file s1]

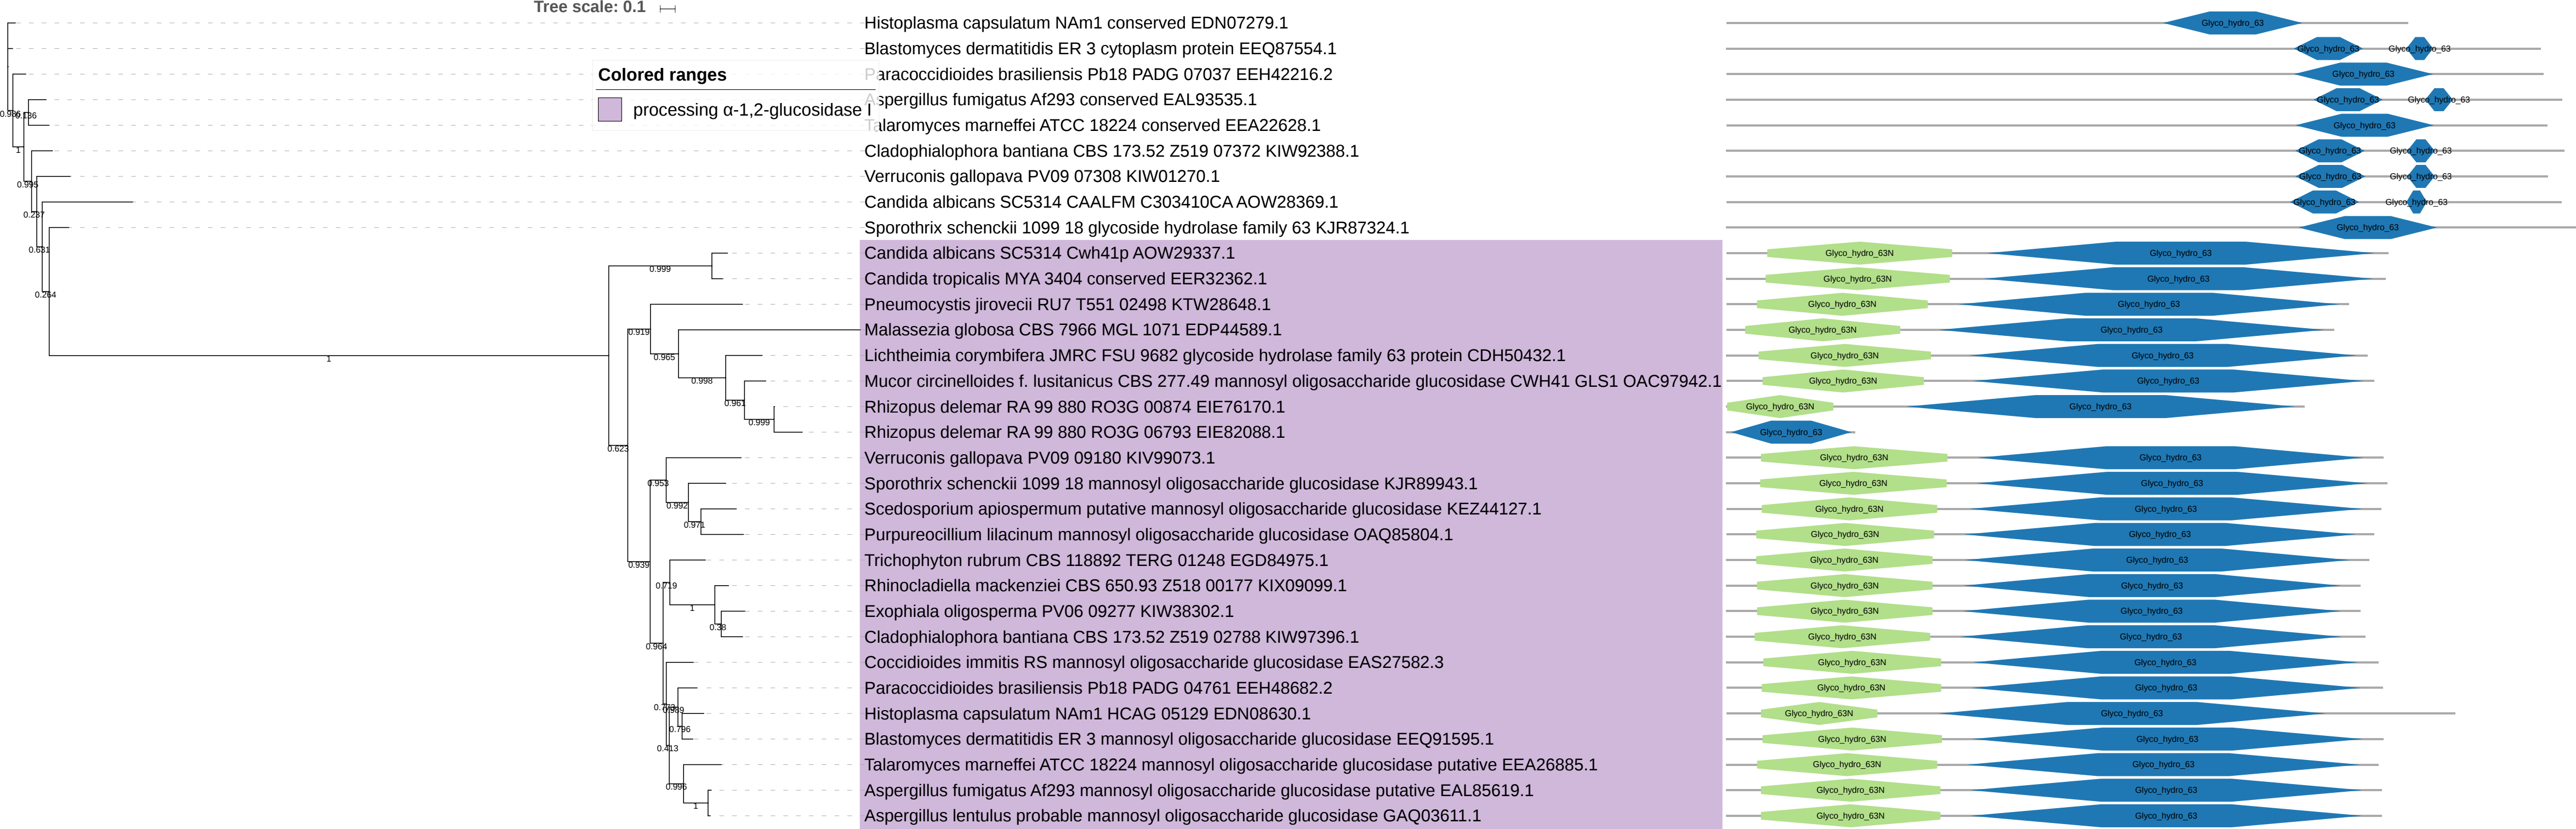

Supplement: s1 [file s1]

ugt51

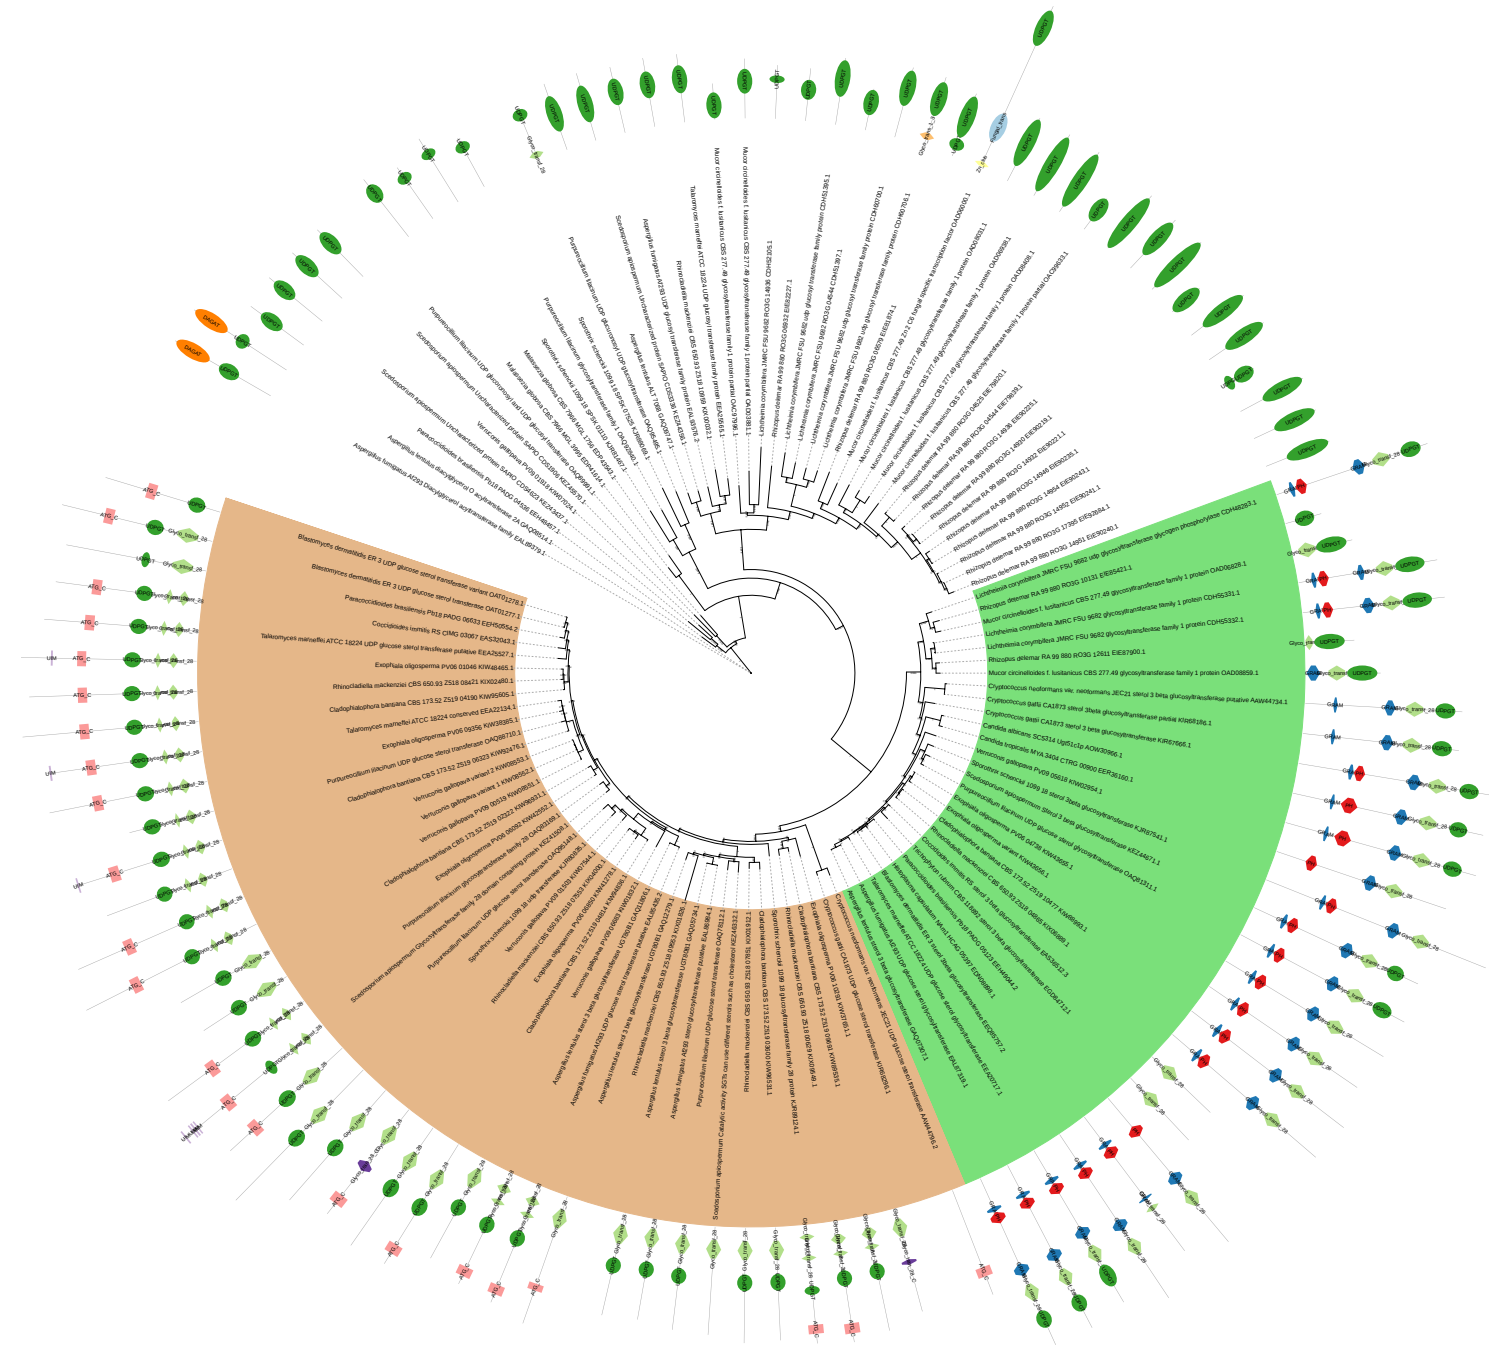

Supplement: s1 [file s1]

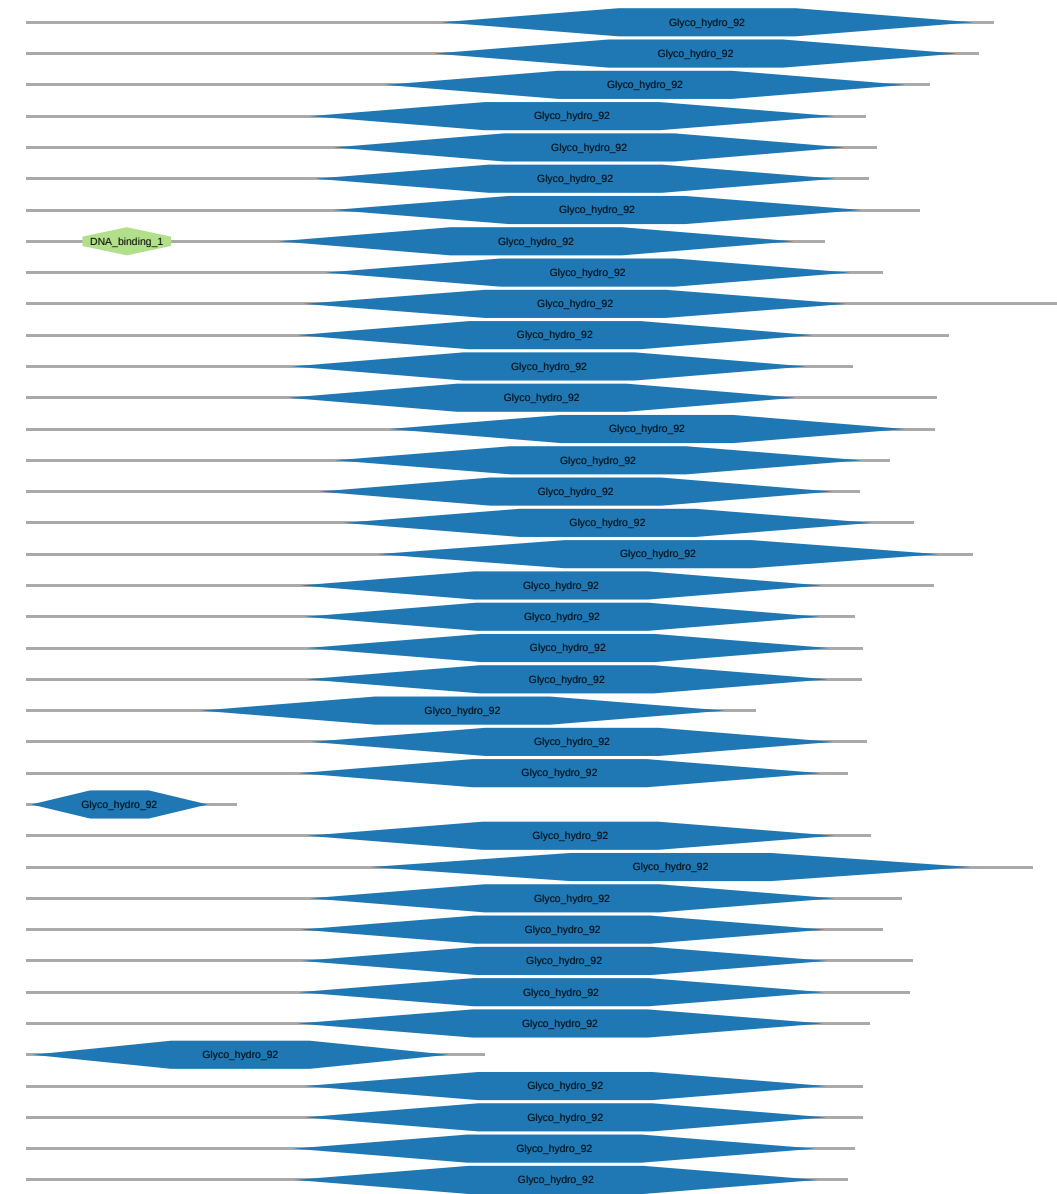

Supplement: s1 [file s1]

## Colored ranges

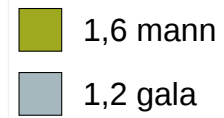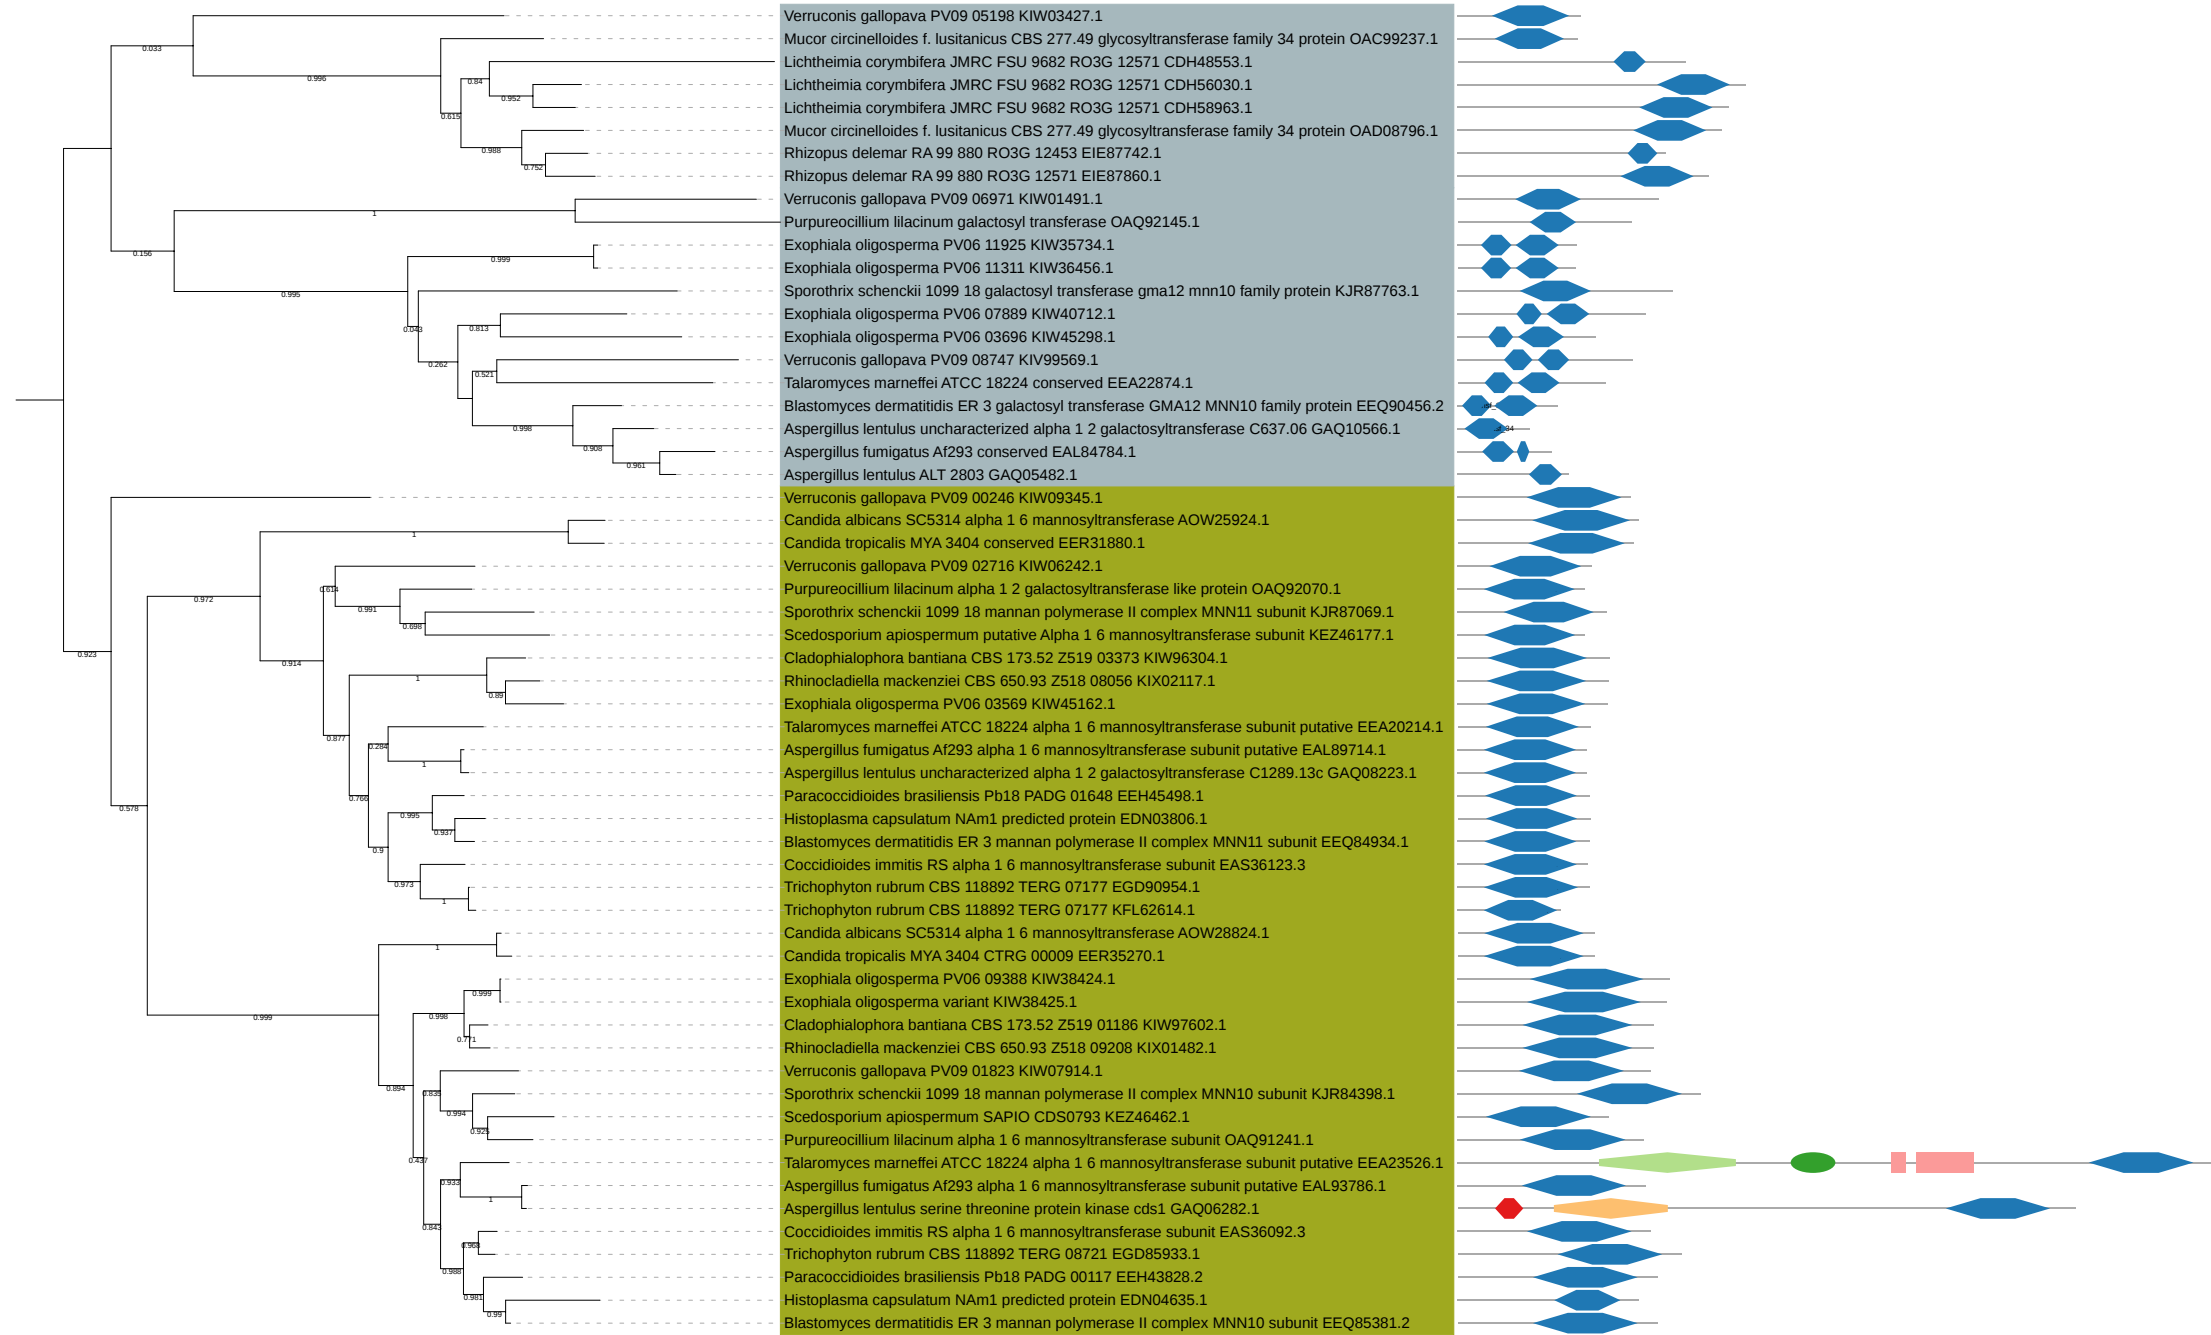

Supplement: s1 [file s1]

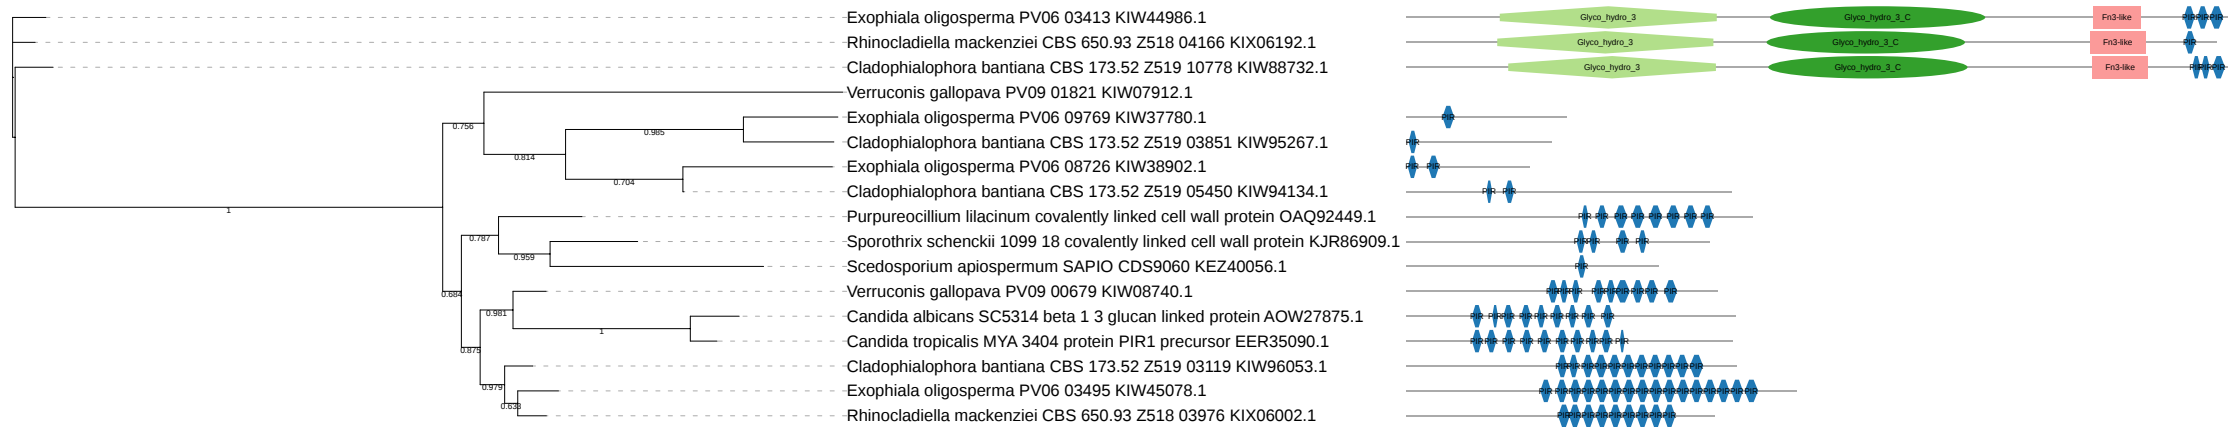

Supplement: s1 [file s1]

## Colored ranges

β-1,2-xylosyltransferase

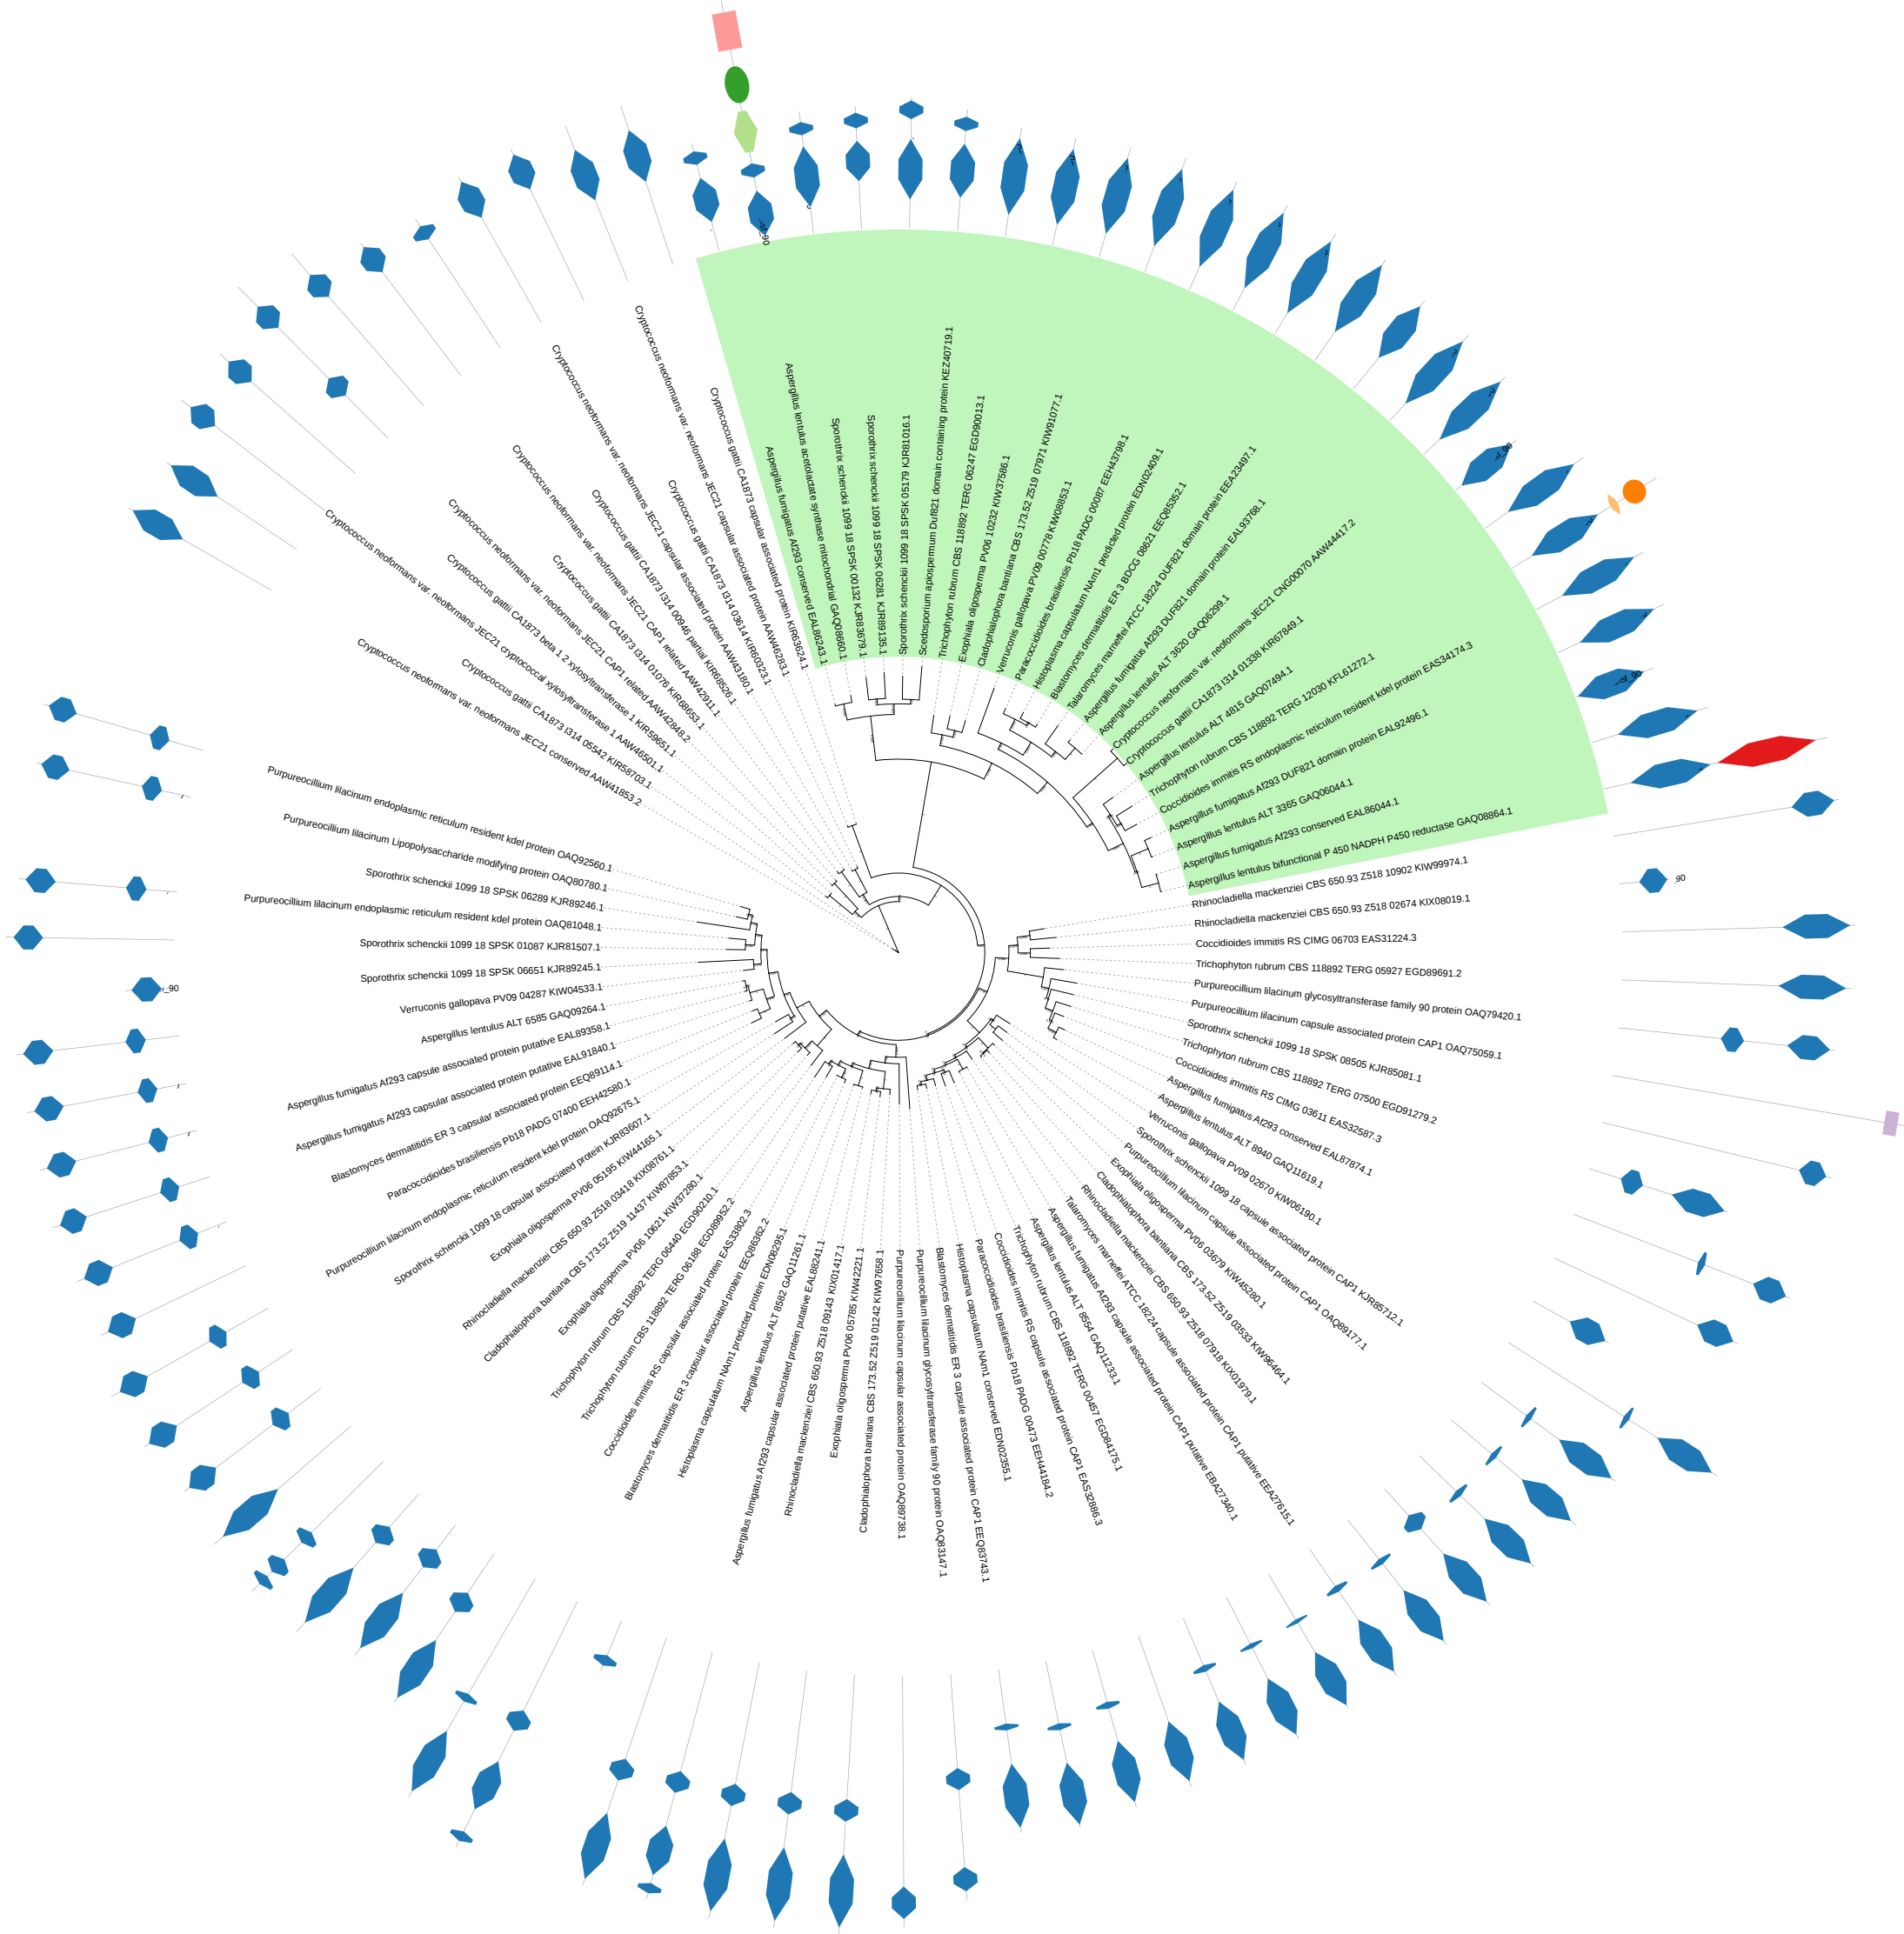

Supplement: s1 [file s1]

Tree scale: 1 

## Colored ranges

 glucosidase

 ceramidase

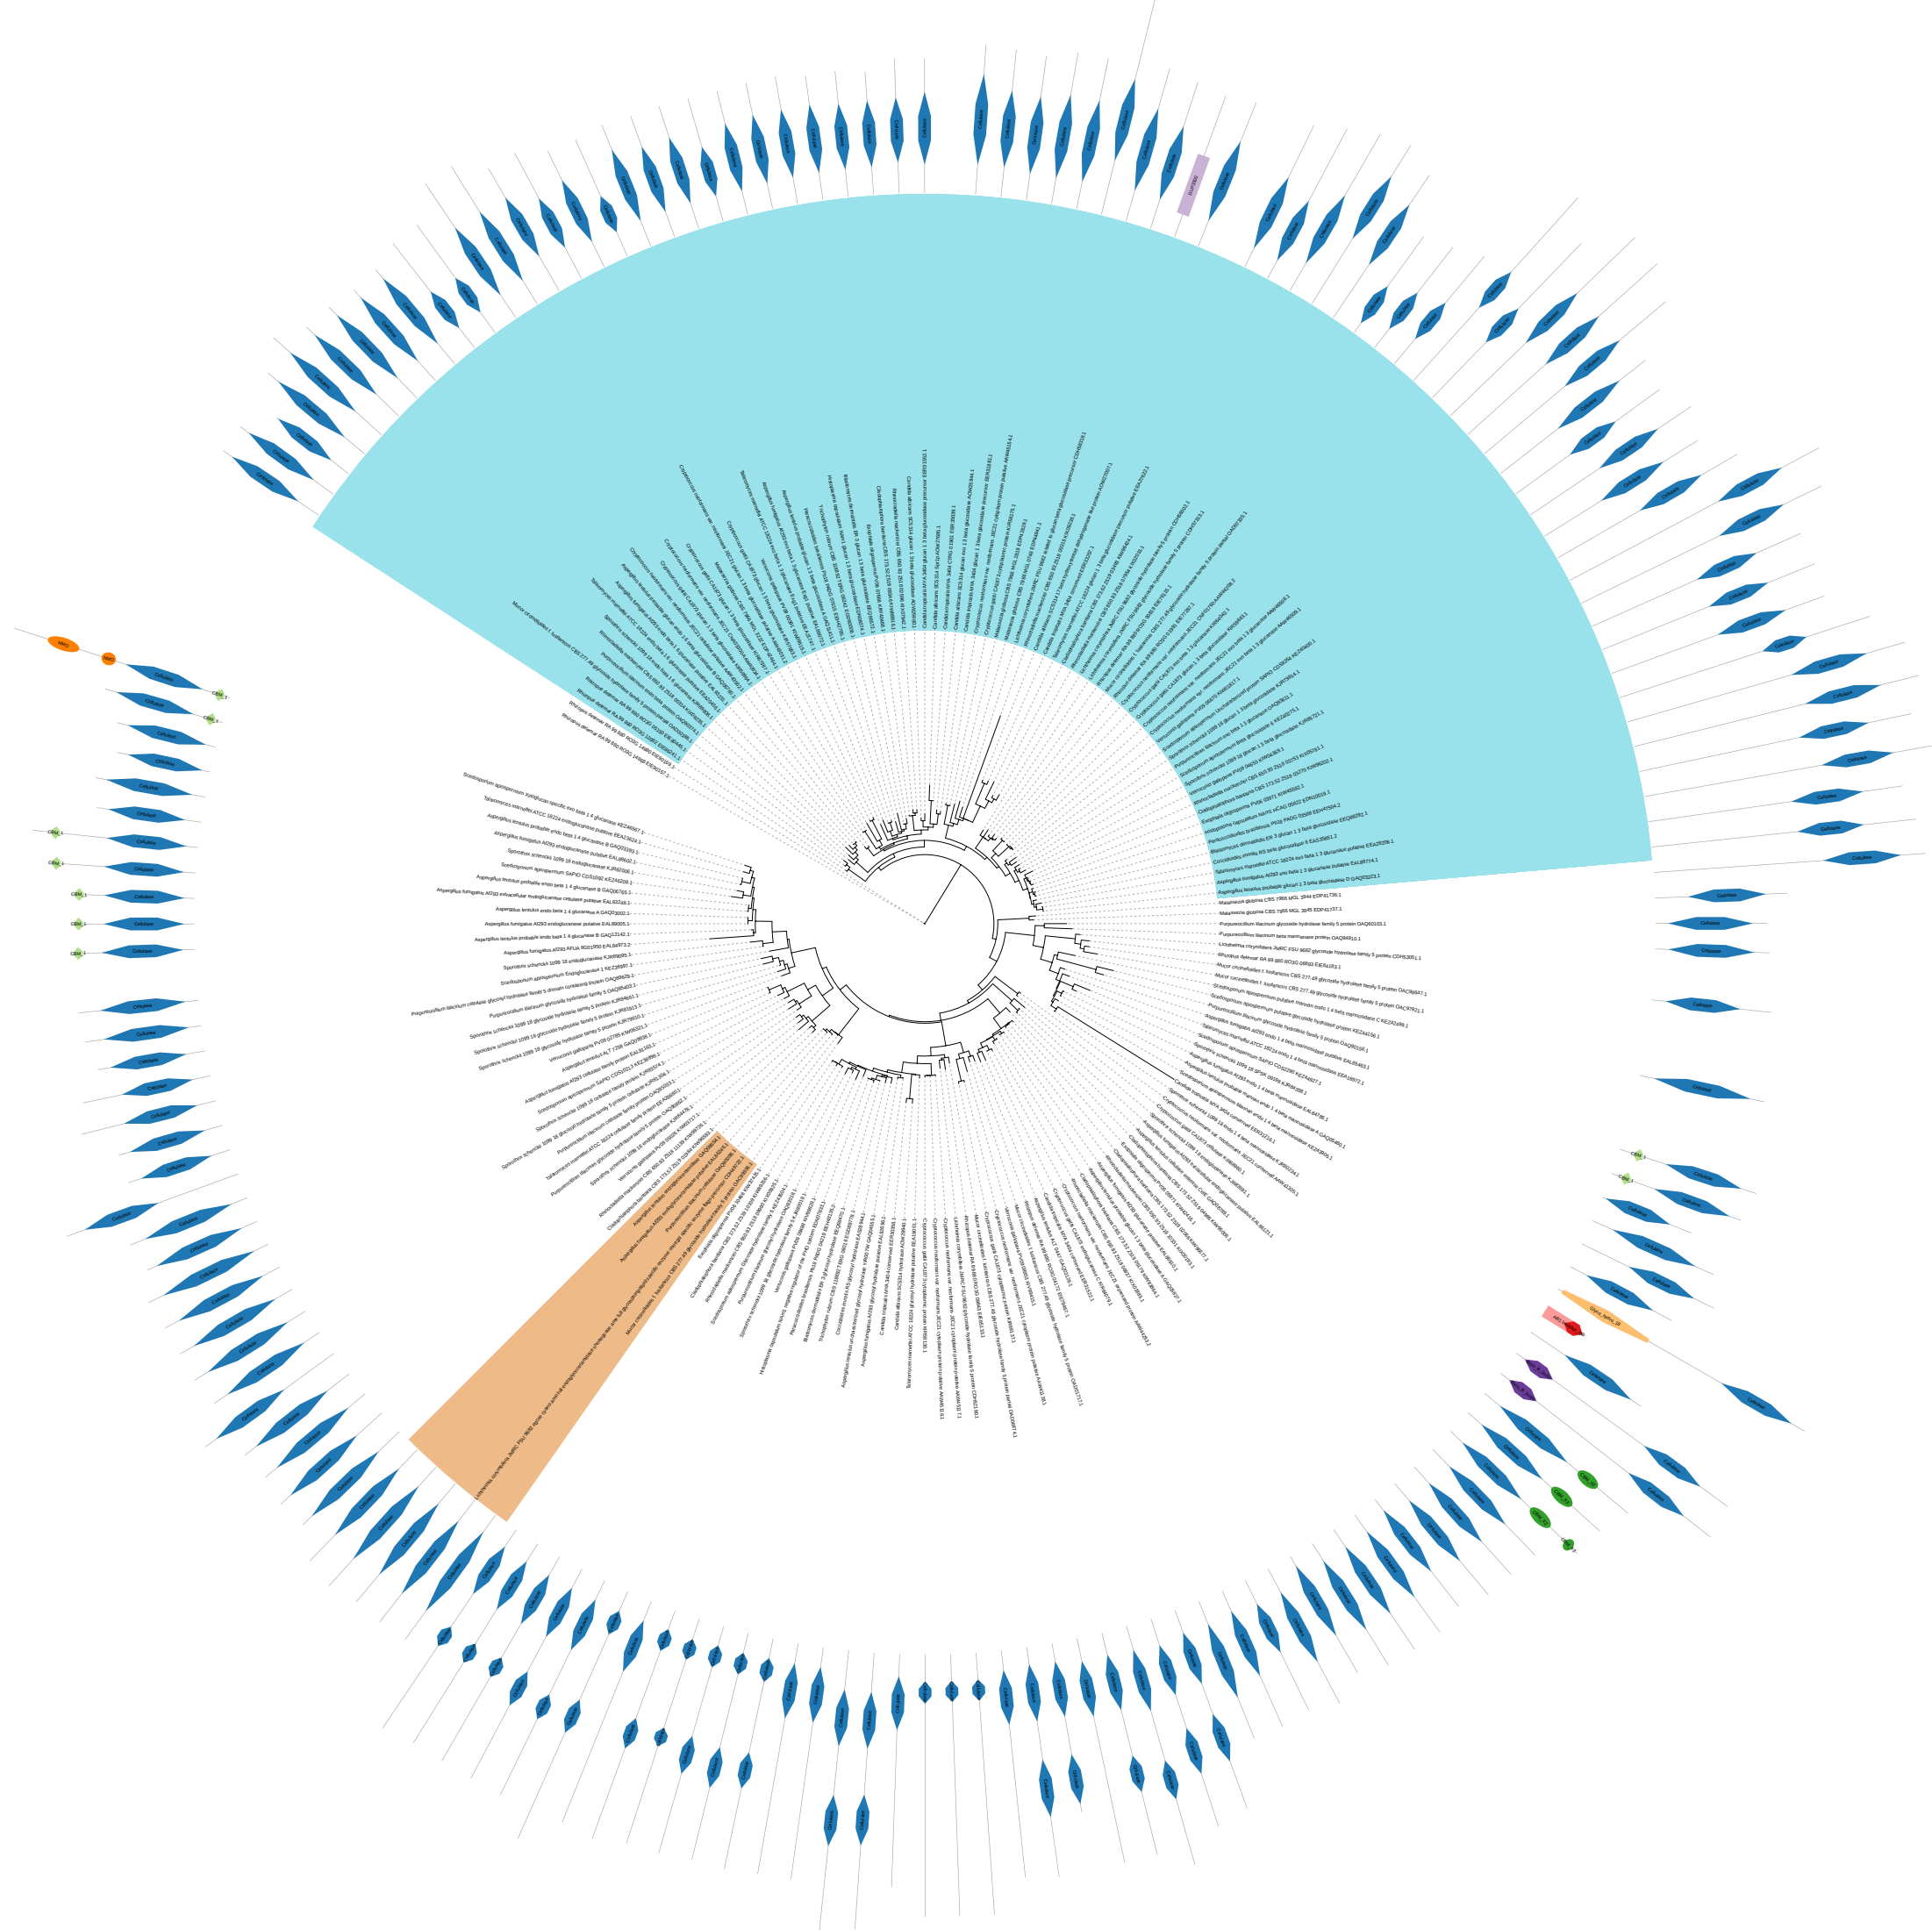

Supplement: s1 [file s1]

1

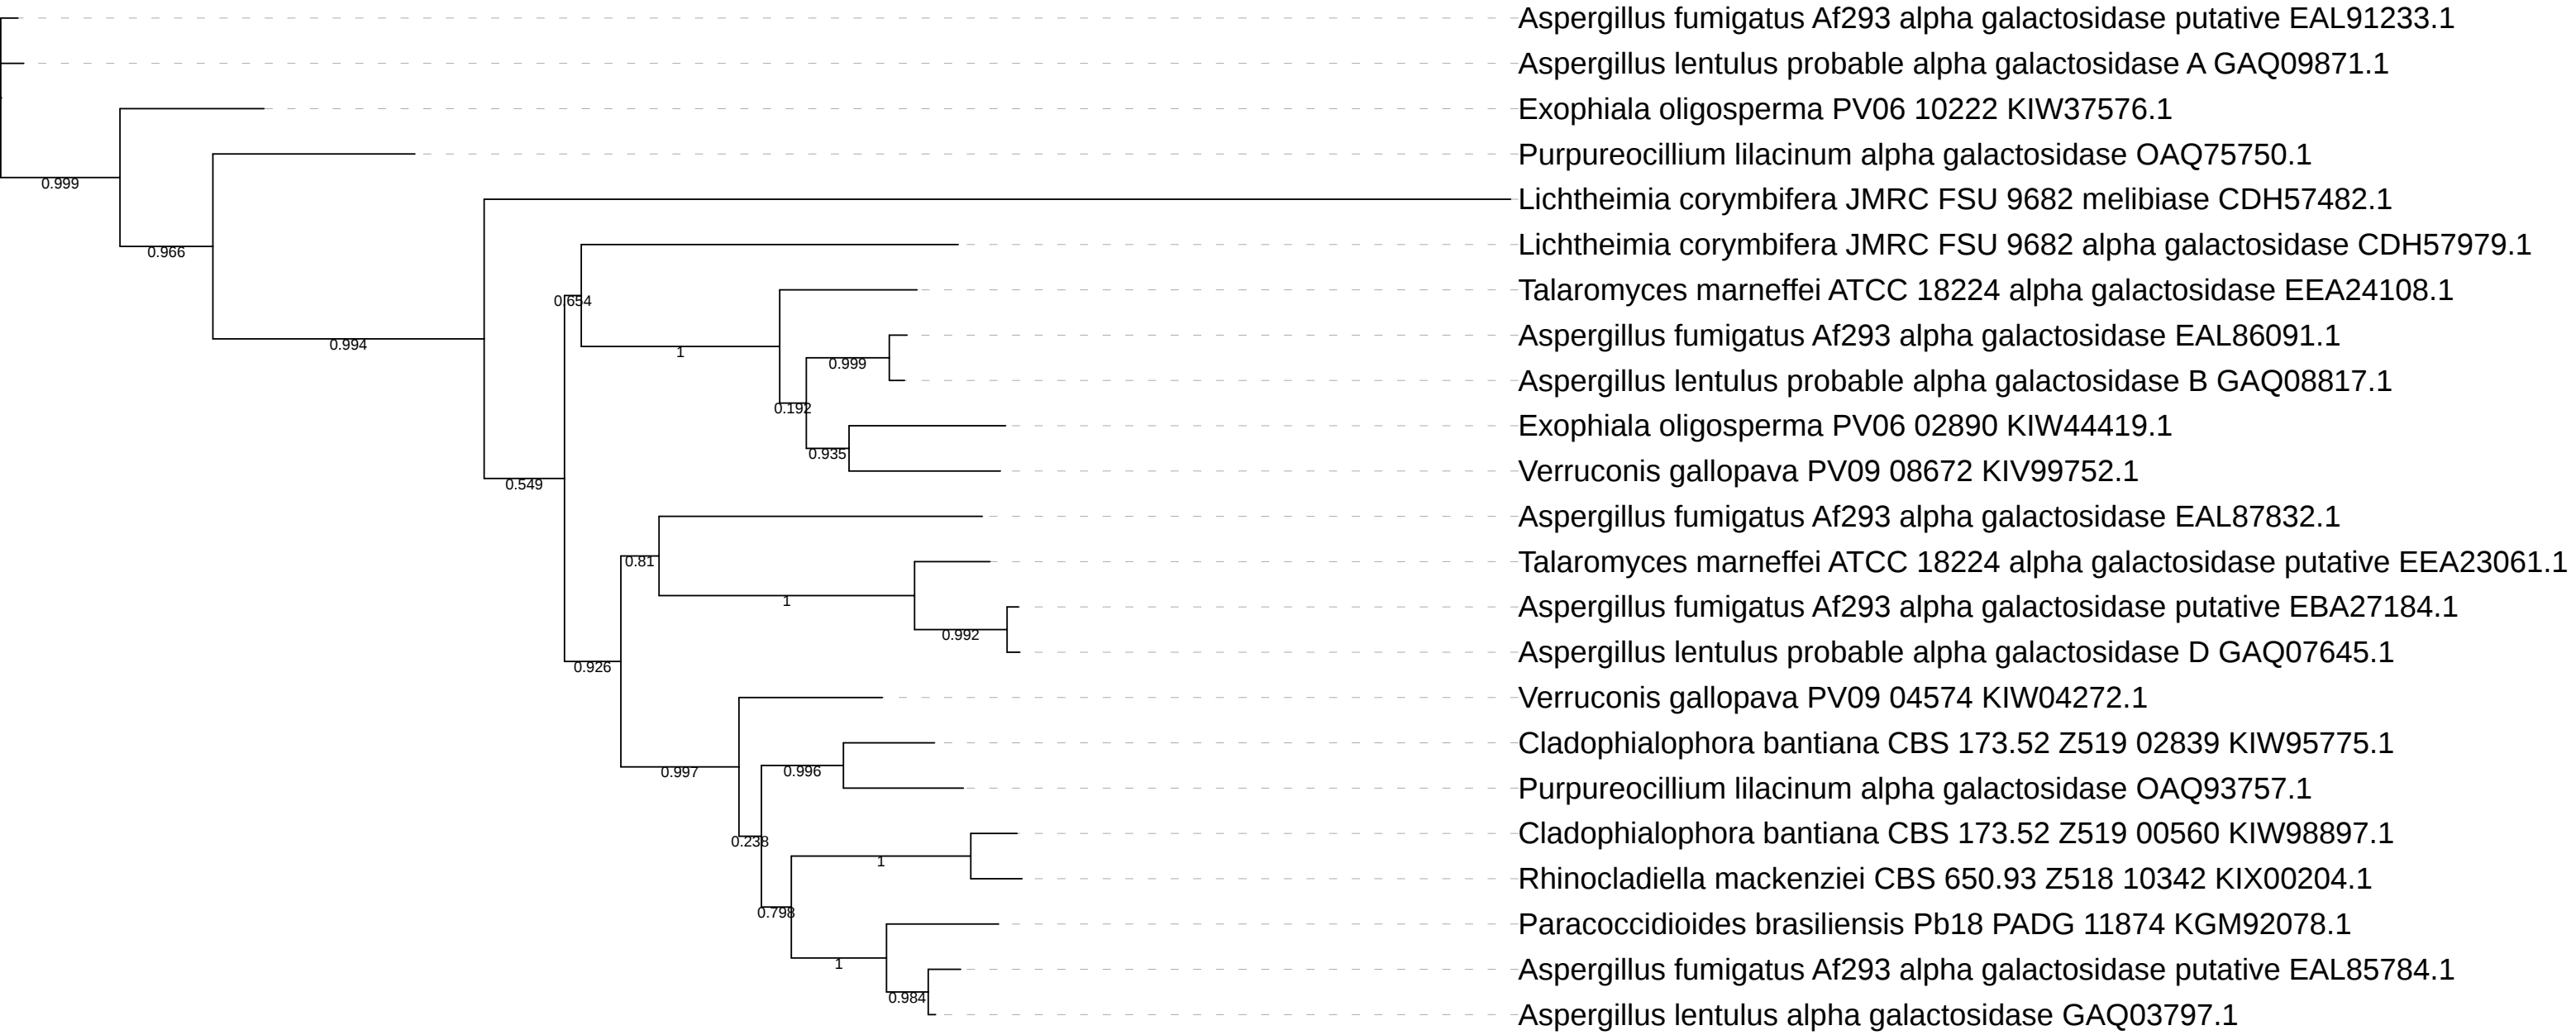

Supplement: s1 [file s1]

**Tree scale: 1**

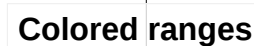

 rhamnogalacturonase

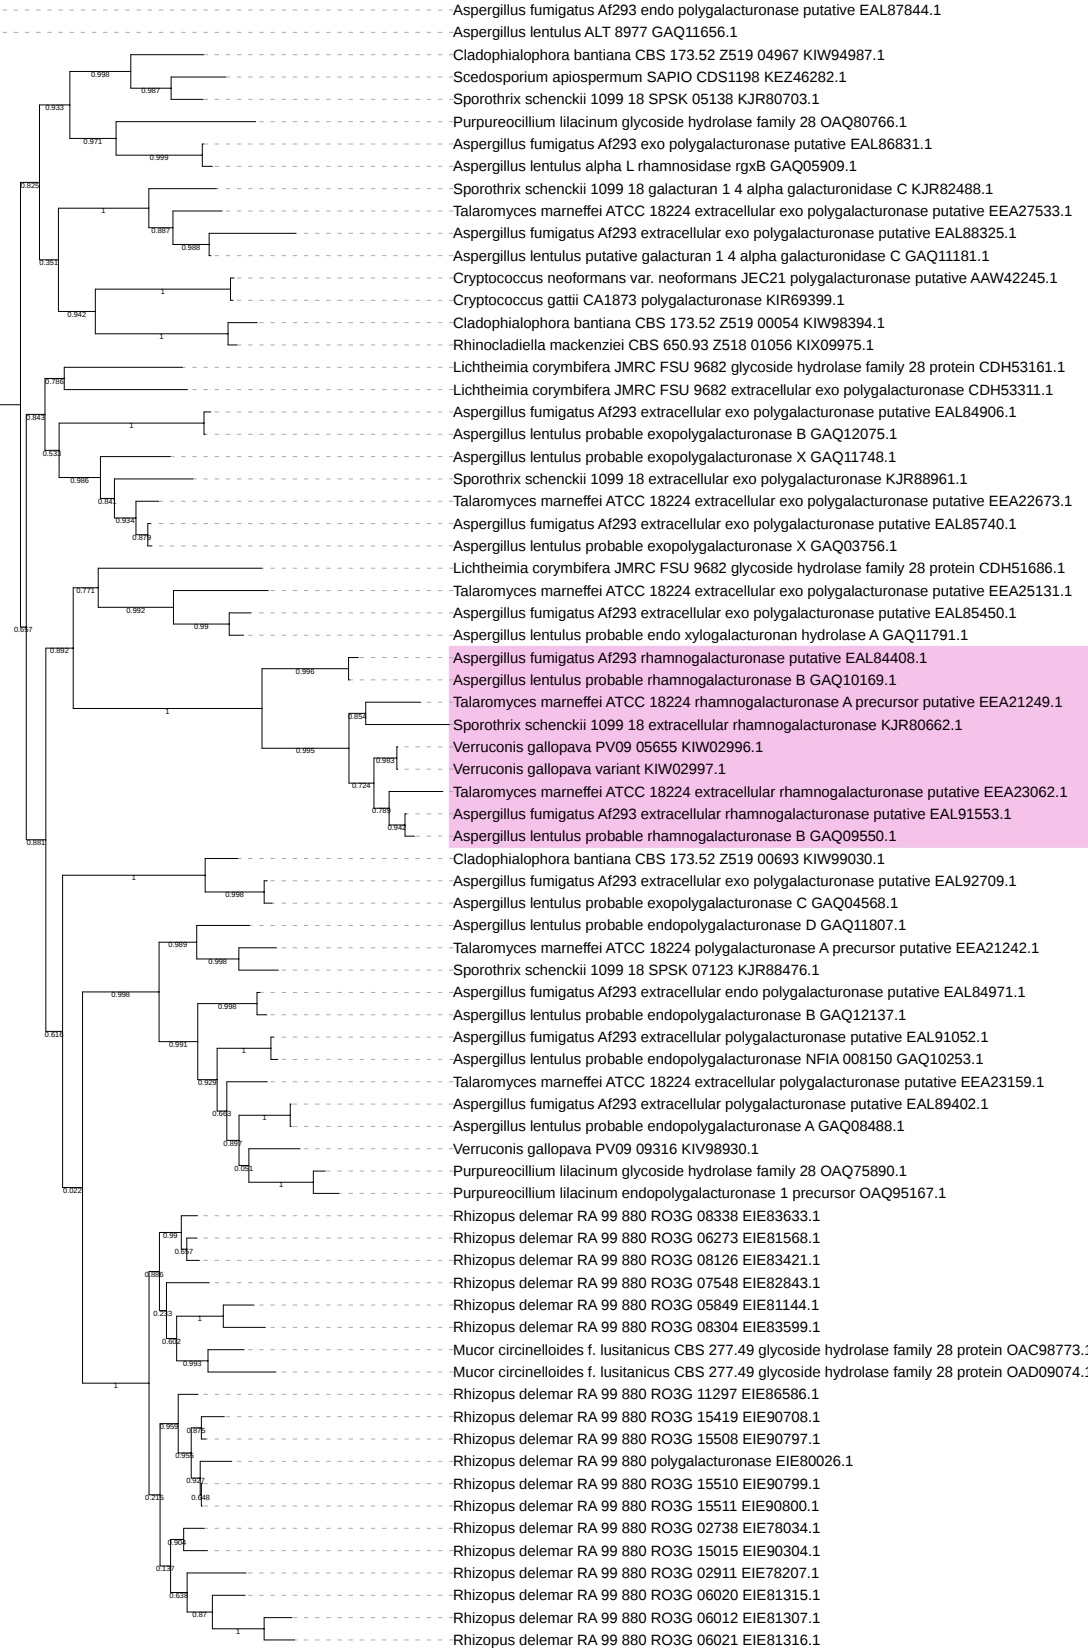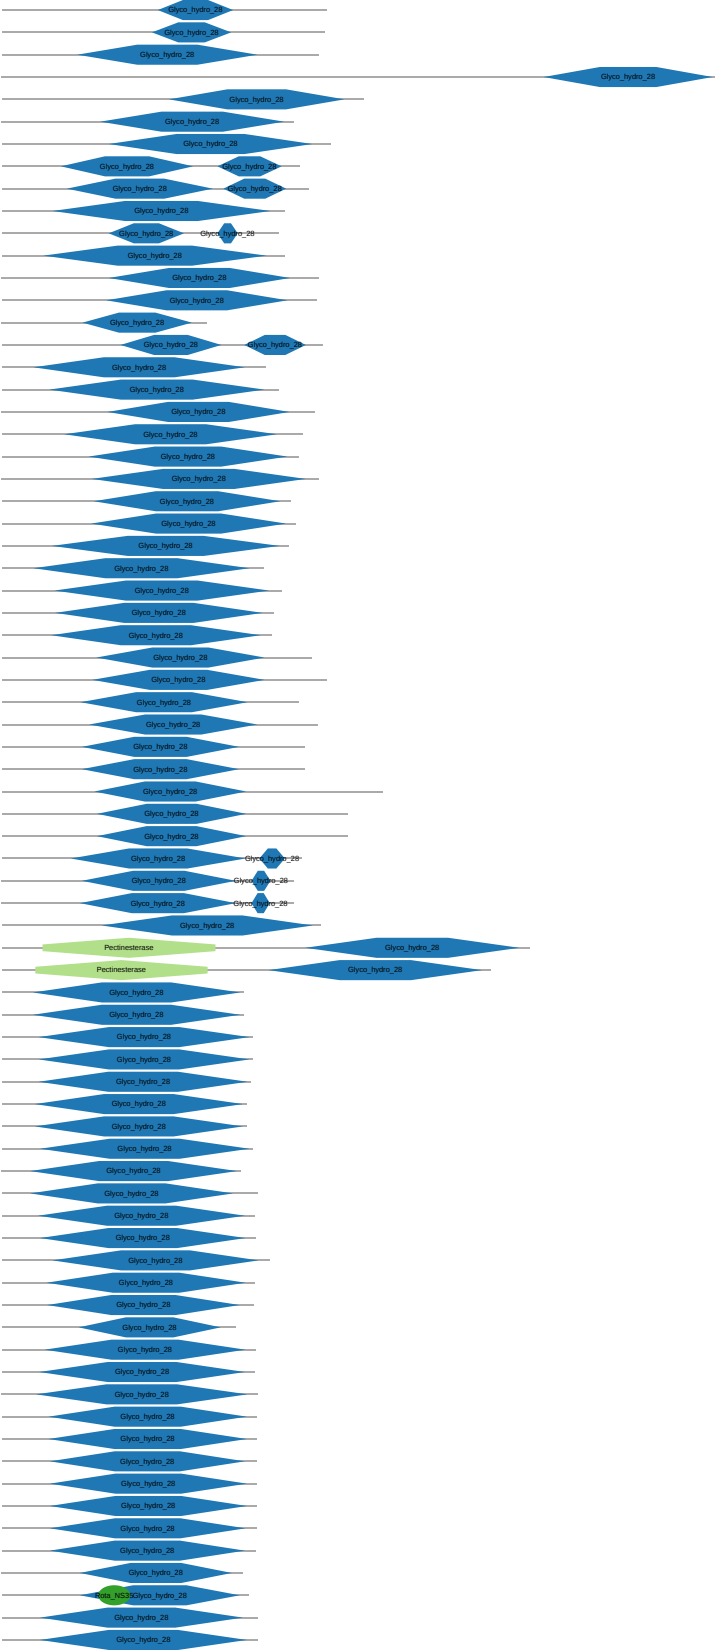

Supplement: s1 [file s1]

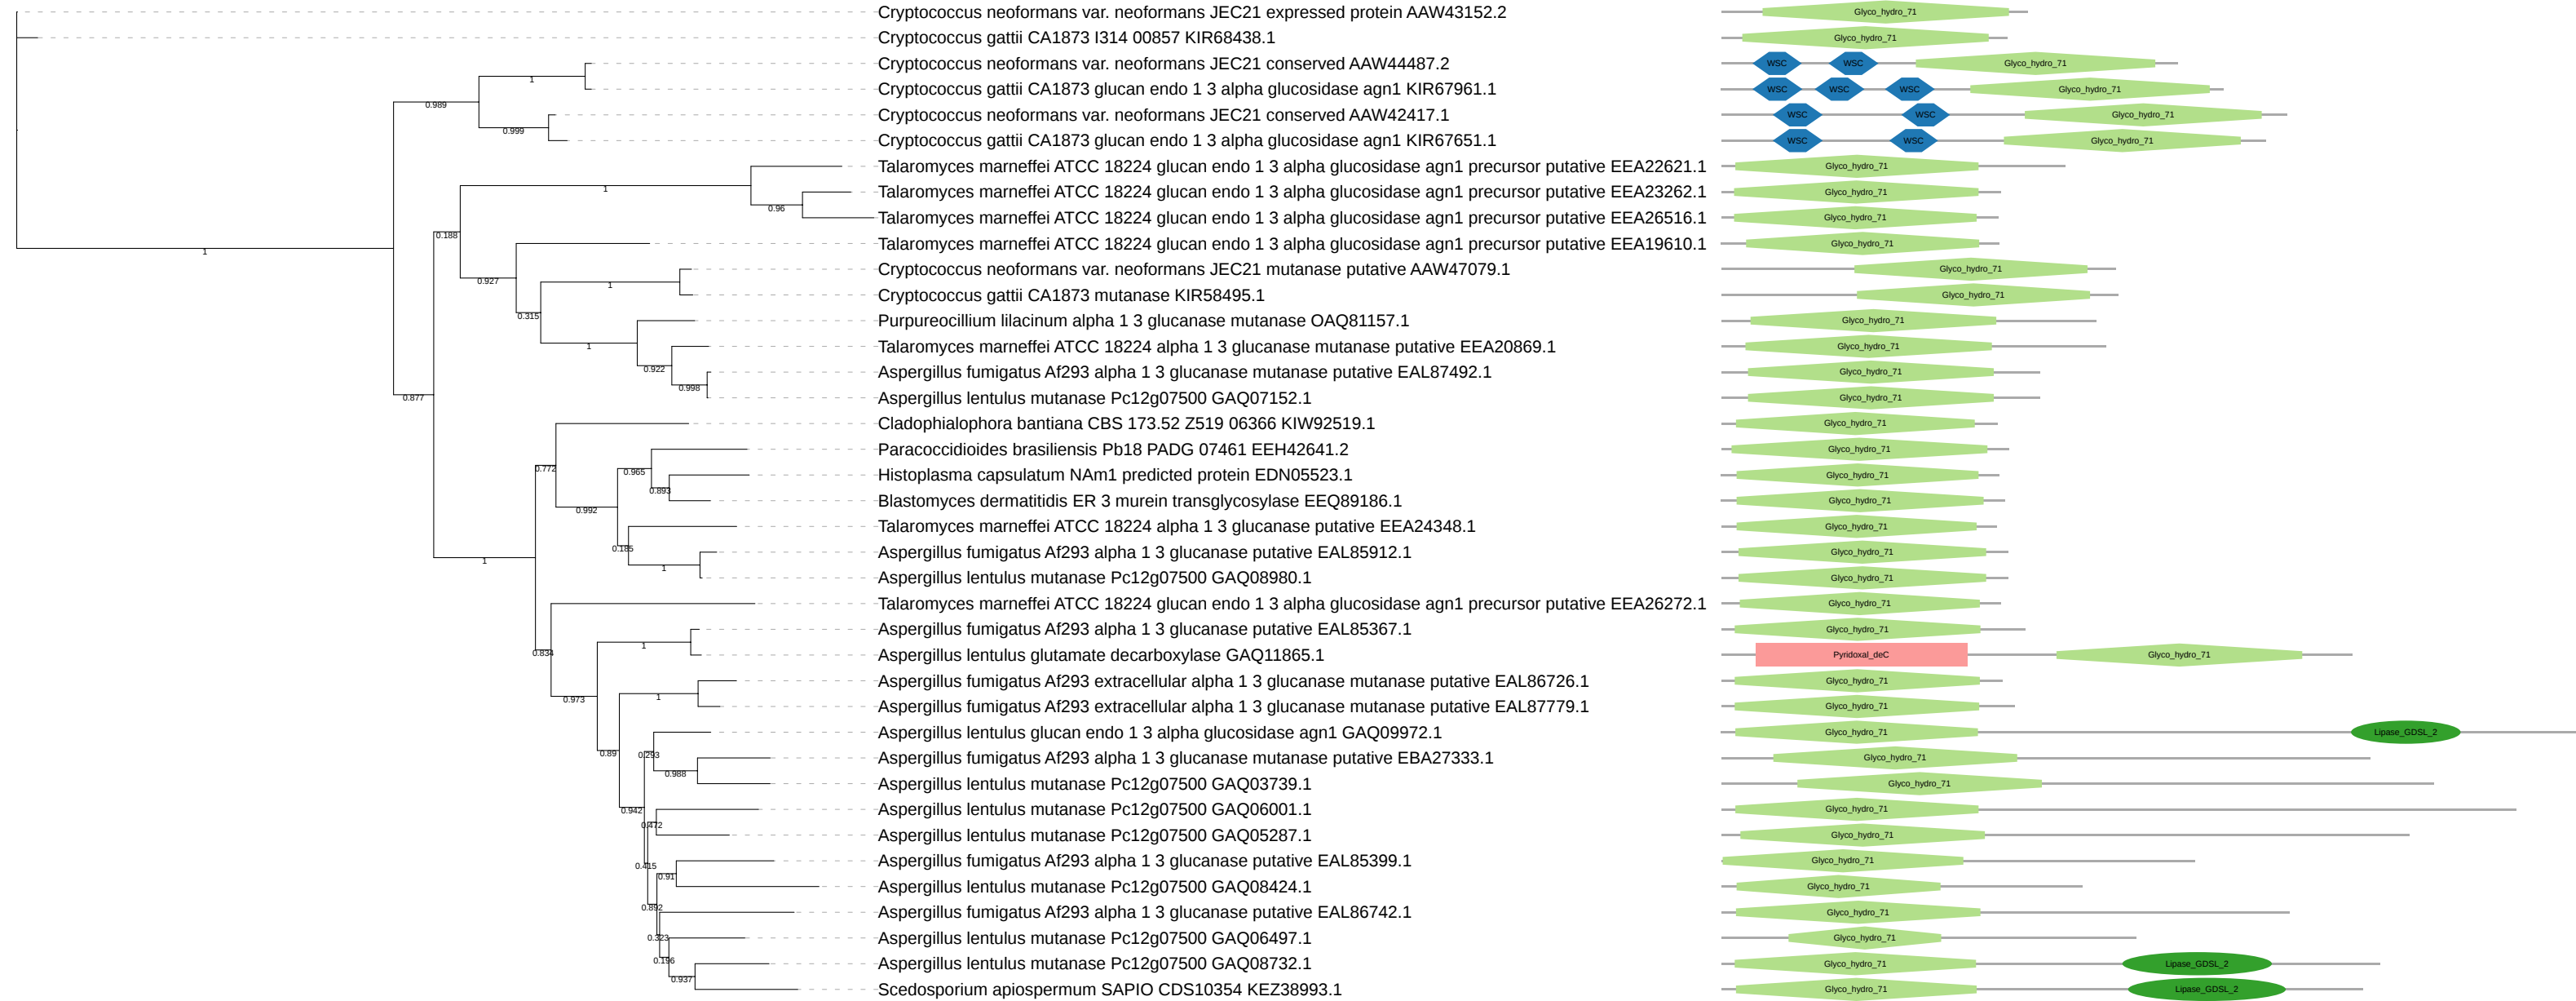

Supplement: s1 [file s1]
